# Supplementary material for: Ru-catalyzed highly chemo- and enantioselective hydrogenation of γ-halo-γ,δ-unsaturated-β-keto esters under neutral conditions
Source: Royal Society of Chemistry journal article supplement (doi:10.1039/c2cc30925d), 2012-01-01
Supplement: c2cc30925d.pdf [file c2cc30925d.pdf]

# Supporting Information

## Ru-Catalyzed Highly Chemo- and Enantioselective Hydrogenation of $\gamma$ -Halo- $\gamma,\delta$ -Unsaturated- $\beta$ -Keto Esters under Neutral Conditions

Xin Ma,<sup>†</sup> Wanfang Li,<sup>†</sup> Xiaoming Li,<sup>†</sup> Xiaoming Tao,<sup>†</sup> Weizheng Fan,<sup>†</sup> Xiaomin Xie,<sup>†</sup> Tahar Ayad,<sup>§</sup> Virginie Ratovelomanana-Vidal<sup>§</sup> and Zhaoguo Zhang<sup>\*†‡</sup>

<sup>†</sup>*School of Chemistry and Chemical Engineering, Shanghai Jiao Tong University, 800 Dongchuan Road, Shanghai 200240, China,* <sup>‡</sup>*Shanghai Institute of Organic Chemistry, 345 Lingling Road, Shanghai 200032, China,* <sup>§</sup>*ENSCP Chimie ParisTech, Laboratoire Charles Friedel (LCF), CNRS, UMR 7223, 75005 Paris, France*

[zhaoguo@sjtu.edu.cn](mailto:zhaoguo@sjtu.edu.cn)

### Contents

|                                                                                              |    |
|----------------------------------------------------------------------------------------------|----|
| General and Materials .....                                                                  | 1  |
| 1. Preparations of 1a-n and their spectra data .....                                         | 2  |
| 2. Preparations of 3a-c and their spectra data.....                                          | 13 |
| 3. Typical procedure for the asymmetric hydrogenation.....                                   | 16 |
| 4. Spectra and HPLC data of 2a-n and 4a-c .....                                              | 16 |
| 5. Typical procedure for the racemates of 2a-n and 4a-c .....                                | 20 |
| 6. Typical procedure for debromination of 4a-c and spectra data of 4a'-c' .....              | 21 |
| References.....                                                                              | 22 |
| Copy of <sup>1</sup> H & <sup>13</sup> C NMR of 1-4 and 5e, 5g, 5j, 6d, 6i, 6k, 7c, 8c ..... | 23 |
| HPLC copies of 2a-n and 4a-c, 4a'-c' .....                                                   | 71 |

### General and Materials

**General:** All reactions were carried out under an atmosphere of nitrogen using standard Schlenk techniques unless otherwise noted. <sup>1</sup>H NMR, <sup>13</sup>C NMR and spectra were obtained on a 400 MHz NMR spectrometer. The chemical shifts for <sup>1</sup>H NMR were recorded in ppm downfield from tetramethylsilane (TMS) with the solvent resonance as the internal standard. The chemical shifts for <sup>13</sup>C NMR were recorded in ppm using the central peak of CDCl<sub>3</sub> (77.16 ppm), DMSO-*d*<sub>6</sub> (39.52 ppm) or Acetone-*d*<sub>6</sub> (29.84 ppm) as the internal standard. Coupling constants (*J*) are reported in Hz and refer to apparent peak multiplications. Flash column chromatography was performed on silica gel (300-400 mesh).

**Materials:** Commercially available reagents were used throughout without further purification other than those detailed below. The solvents used in catalyst preparation and hydrogenation reactions were pretreated by the following procedures: MeOH and EtOH were distilled over magnesium under nitrogen. CH<sub>2</sub>Cl<sub>2</sub> were distilled over calcium hydride under nitrogen. *n*-PrOH was distilled over first sodium tetrahydroborate then calcium hydride under nitrogen.

## 1. Preparations of 1a-n and their spectra data

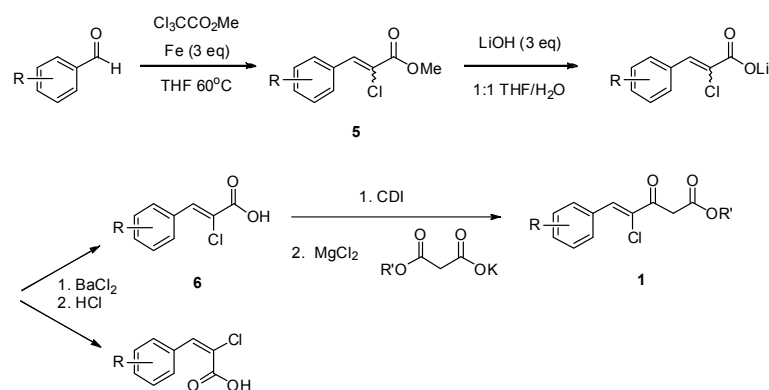

### 1.1 Preparations of methyl 2-chloro-3-arylacrylates

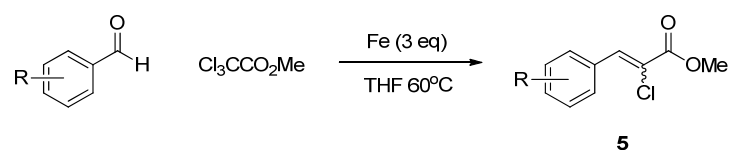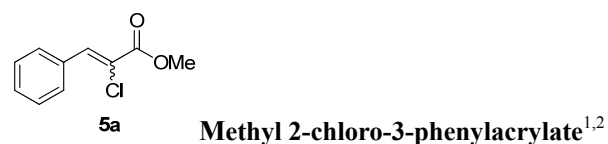

**5a** was synthesized follow a modified reported procedure.<sup>3</sup> To a pre-heated (oil bath temperature 55-60 °C) suspension of reduced iron powder (95.0 g, 1.70 mol, 3.0 eq. commercial, activated by stirring in 3% HCl for 10 min, washed with pure water, EtOH and Et<sub>2</sub>O successively, dried under vacuum.) in 1.3 L anhydrous THF, a THF solution (170 mL) of benzaldehyde (60.0 g, 0.57 mol, 1.0 eq.) and methyl trichloroacetate (126.6 g, 0.68 mol, 95% wt, 1.2 eq.) was added dropwise within 6 hours. The reaction was exothermic and the color of reaction mixture darkened gradually. After addition, stirred for another 1-2 h then quenched by water. (The dechlorinated byproduct methyl cinnamate formed when aldehyde was only partial converted, quenched the reaction when the amount of methyl cinnamate was >2%, monitored by GC) Filtered through Celite, the solvent was evaporated off, and the residual was dissolved with EtOAc (500 mL), dried over Na<sub>2</sub>SO<sub>4</sub>. The solvent was removed under vacuum, the residual was purified by flash chromatography on silica gel (petrol ether/EtOAc = 50/1) to give 66.5 g product, as pale yellow oil (*Z/E* = 7/1). Yield: 60%.

**Z-5a**<sup>1</sup>: <sup>1</sup>H NMR (400 MHz, CDCl<sub>3</sub>) δ 7.92 (s, 1H), 7.86 – 7.83 (m, 2H), 7.45 – 7.41 (m, 3H), 3.91 (s, 3H). <sup>13</sup>C NMR (100 MHz, CDCl<sub>3</sub>) δ 164.0, 137.3, 132.9, 130.7, 130.3, 128.6, 121.8, 53.4.

**E-5a**<sup>2</sup>: <sup>1</sup>H NMR (400 MHz, CDCl<sub>3</sub>) δ 7.35 – 7.28 (m, 5H), 7.22 (s, 1H), 3.75 (s, 3H). <sup>13</sup>C NMR (100 MHz, CDCl<sub>3</sub>) δ 164.0, 137.4, 133.7, 129.0, 128.4, 128.3, 122.4, 52.8.

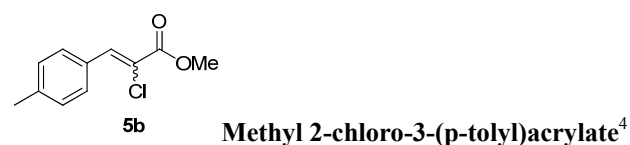

Yield: 59%, pale yellow solid (*Z/E* = 5/1).

**Z-5b**:  $^1\text{H}$  NMR (400 MHz,  $\text{CDCl}_3$ )  $\delta$  7.89 (s, 1H), 7.79 – 7.74 (m, 2H), 7.26 – 7.22 (m, 2H), 3.90 (s, 3H), 2.39 (s, 3H).  $^{13}\text{C}$  NMR (100 MHz,  $\text{CDCl}_3$ )  $\delta$  164.1, 140.9, 137.3, 130.9, 130.2, 129.4, 120.8, 53.4, 21.6.

**E-5b**:  $^1\text{H}$  NMR (400 MHz,  $\text{CDCl}_3$ )  $\delta$  7.23 – 7.12 (m, 5H), 3.77 (s, 3H), 2.35 (s, 3H).  $^{13}\text{C}$  NMR (100 MHz,  $\text{CDCl}_3$ )  $\delta$  164.2, 139.2, 137.7, 130.8, 129.1, 128.6, 121.5, 52.8, 21.4.

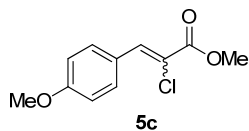

**Methyl 2-chloro-3-(4-methoxyphenyl)acrylate**<sup>1</sup>

Yield: 62%, pale yellow solid ( $Z/E = 5/1$ ).

**Z-5c**<sup>1</sup>:  $^1\text{H}$  NMR (400 MHz,  $\text{CDCl}_3$ )  $\delta$  7.90 – 7.83 (m, 3H), 6.98 – 6.92 (m, 2H), 3.89 (s, 3H), 3.86 (s, 3H).  $^{13}\text{C}$  NMR (100 MHz,  $\text{CDCl}_3$ )  $\delta$  164.1, 161.1, 136.8, 132.7, 125.4, 119.0, 114.0, 55.3, 53.2.

**E-5c**:  $^1\text{H}$  NMR (400 MHz,  $\text{CDCl}_3$ )  $\delta$  7.33 – 7.30 (m, 2H), 7.16 (s, 1H), 6.89 – 6.83 (m, 2H), 3.82 (s, 3H), 3.79 (s, 3H).  $^{13}\text{C}$  NMR (100 MHz,  $\text{CDCl}_3$ )  $\delta$  164.1, 160.2, 137.9, 130.6, 125.9, 120.0, 113.7, 55.2, 52.8.

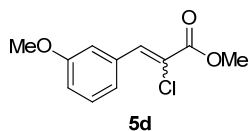

**Methyl 2-chloro-3-(3-methoxyphenyl)acrylate**<sup>2</sup>

Yield: 43%, pale yellow oil ( $Z/E = 5/1$ ).

**Z-5d**:  $^1\text{H}$  NMR (400 MHz,  $\text{CDCl}_3$ )  $\delta$  7.89 (s, 1H), 7.46 – 7.29 (m, 3H), 6.99 – 6.93 (m, 1H), 3.90 (s, 3H), 3.84 (s, 3H).  $^{13}\text{C}$  NMR (100 MHz,  $\text{CDCl}_3$ )  $\delta$  163.6, 159.3, 137.0, 133.8, 129.4, 123.3, 121.7, 116.0, 115.4, 55.1, 53.2.

**E-5d**<sup>2</sup>:  $^1\text{H}$  NMR (400 MHz,  $\text{CDCl}_3$ )  $\delta$  7.27 – 7.23 (m, 2H), 7.17 (s, 1H), 6.90 – 6.83 (m, 2H), 3.79 (s, 3H), 3.76 (s, 3H).  $^{13}\text{C}$  NMR (100 MHz,  $\text{CDCl}_3$ )  $\delta$  163.9, 159.1, 136.7, 134.7, 129.2, 122.4, 120.8, 114.5, 113.6, 55.0, 52.7.

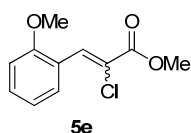

**Methyl 2-chloro-3-(2-methoxyphenyl)acrylate**

Yield: 60%, pale yellow oil ( $Z/E = 6/1$ ).

**Z-5e**:  $^1\text{H}$  NMR (400 MHz,  $\text{CDCl}_3$ )  $\delta$  8.26 (s, 1H), 8.09 (dd,  $J = 8.0, 1.6$  Hz, 1H), 7.42 – 7.34 (m, 1H), 7.05 – 6.97 (m, 1H), 6.92 (dd,  $J = 8.4, 0.8$  Hz, 1H), 3.90 (s, 3H), 3.87 (s, 3H).  $^{13}\text{C}$  NMR (100 MHz,  $\text{CDCl}_3$ )  $\delta$  164.2, 158.1, 132.5, 131.7, 130.2, 122.1, 122.0, 120.3, 110.7, 55.7, 53.4. HRMS Calculated for  $\text{C}_{11}\text{H}_{11}\text{ClO}_3$  ( $M+\text{Na}$ ) 249.0294, found: 249.0287.

**E-5e**:  $^1\text{H}$  NMR (400 MHz,  $\text{CDCl}_3$ )  $\delta$  7.34 – 7.28 (m, 2H), 7.23 – 7.20 (m, 1H), 6.94 – 6.89 (m, 1H), 6.87 (dd,  $J = 8.4, 0.8$  Hz, 1H), 3.83 (s, 3H), 3.71 (s, 3H).  $^{13}\text{C}$  NMR (100 MHz,  $\text{CDCl}_3$ )  $\delta$  164.3, 156.7, 134.0, 130.6, 129.9, 123.2, 122.9, 120.4, 110.7, 55.6, 52.8. HRMS Calculated for  $\text{C}_{11}\text{H}_{11}\text{ClO}_3$  ( $M+\text{Na}$ ) 249.0294, found: 249.0300.

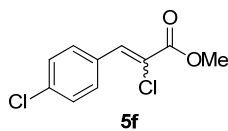

**Methyl 2-chloro-3-(4-chlorophenyl)acrylate**<sup>5</sup>

Yield: 56%, white solid (*Z/E* = 7/1).

**Z-5f**: <sup>1</sup>H NMR (400 MHz, CDCl<sub>3</sub>) δ 7.87 (s, 1H), 7.81 – 7.76 (m, 2H), 7.43 – 7.38 (m, 2H), 3.91 (s, 3H). <sup>13</sup>C NMR (100 MHz, CDCl<sub>3</sub>) δ 163.8, 136.3, 136.0, 132.0, 131.4, 129.0, 122.4, 53.6.

**E-5f**: <sup>1</sup>H NMR (400 MHz, CDCl<sub>3</sub>) δ 7.35 – 7.30 (m, 2H), 7.28 – 7.22 (m, 2H), 7.17 (s, 1H), 3.77 (s, 3H). <sup>13</sup>C NMR (100 MHz, CDCl<sub>3</sub>) δ 163.6, 136.6, 134.9, 132.1, 129.9, 128.6, 123.1, 52.9.

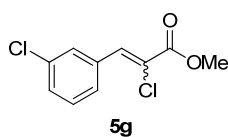

**Methyl 2-chloro-3-(3-chlorophenyl)acrylate**

Yield: 45%, white solid (*Z/E* = 10/1), *E-5g* was not isolated.

**Z-5g**: <sup>1</sup>H NMR (400 MHz, CDCl<sub>3</sub>) δ 7.84 (s, 2H), 7.68 (dt, *J* = 6.4, 1.8 Hz, 1H), 7.40 – 7.33 (m, 2H), 3.91 (s, 3H). <sup>13</sup>C NMR (100 MHz, CDCl<sub>3</sub>) δ 163.6, 135.8, 135.6, 134.6, 130.29, 130.26, 129.9, 128.8, 123.3, 53.6. HRMS Calculated for C<sub>10</sub>H<sub>8</sub>Cl<sub>2</sub>O<sub>2</sub> (M+H) 230.9980, found: 230.9967.

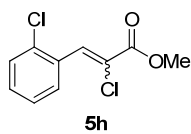

**Methyl 2-chloro-3-(2-chlorophenyl)acrylate**<sup>6</sup>

Yield: 44%, yellow oil (*Z/E* = 20/1), *E-5h* was not isolated.

**Z-5h**: <sup>1</sup>H NMR (400 MHz, CDCl<sub>3</sub>) δ 8.16 (s, 1H), 7.99 – 7.93 (m, 1H), 7.48 – 7.42 (m, 1H), 7.36 – 7.30 (m, 2H), 3.93 (s, 3H). <sup>13</sup>C NMR (100 MHz, CDCl<sub>3</sub>) δ 163.4, 134.8, 134.1, 131.4, 130.9, 130.7, 129.7, 126.6, 124.6, 53.5.

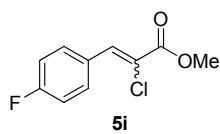

**Methyl 2-chloro-3-(4-fluorophenyl)acrylate**<sup>7</sup>

Yield: 56%, white solid (*Z/E* = 8/1).

**Z-5i**: <sup>1</sup>H NMR (400 MHz, CDCl<sub>3</sub>) δ 7.89 – 7.83 (m, 3H), 7.16 – 7.08 (m, 2H), 3.90 (s, 3H). <sup>13</sup>C NMR (100 MHz, CDCl<sub>3</sub>) δ 163.9, 163.6 (d, *J* = 252.8 Hz), 136.0, 132.9 (d, *J* = 8.5 Hz), 129.2 (d, *J* = 2.8 Hz), 121.5, 115.8 (d, *J* = 21.7 Hz), 53.5.

**E-5i**: <sup>1</sup>H NMR (400 MHz, CDCl<sub>3</sub>) δ 7.35 – 7.28 (m, 2H), 7.18 (s, 1H), 7.07 – 6.99 (m, 2H), 3.77 (s, 3H). <sup>13</sup>C NMR (100 MHz, CDCl<sub>3</sub>) δ 163.8, 163.0 (d, *J* = 250.1 Hz), 136.9, 130.7 (d, *J* = 8.3 Hz), 129.9 (d, *J* = 2.9 Hz), 122.5, 115.5 (d, *J* = 21.8 Hz), 52.9.

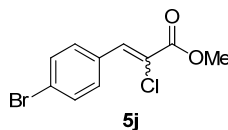

**Methyl 3-(4-bromophenyl)-2-chloroacrylate**

Yield: 51%, white solid (*Z/E* = 8/1).

**Z-5j**: <sup>1</sup>H NMR (400 MHz, CDCl<sub>3</sub>) δ 7.85 (s, 1H), 7.73 – 7.69 (m, 2H), 7.58 – 7.54 (m, 2H), 3.91 (s, 3H). <sup>13</sup>C NMR (100 MHz, CDCl<sub>3</sub>) δ 163.7, 136.0, 132.1, 131.9, 131.8, 124.7, 122.5, 53.6. HRMS Calculated for C<sub>10</sub>H<sub>8</sub>BrClO<sub>2</sub> (M+Na) 296.9294, found: 296.9296.

**E-5j**: <sup>1</sup>H NMR (400 MHz, CDCl<sub>3</sub>) δ 7.50 – 7.45 (m, 2H), 7.20 – 7.16 (m, 2H), 7.15 (s, 1H), 3.76 (s, 3H). <sup>13</sup>C NMR (100 MHz, CDCl<sub>3</sub>) δ 163.7, 136.7, 132.7, 131.6, 130.2, 123.3, 53.1. <sup>13</sup>C NMR (100 MHz, Acetone-d<sub>6</sub>) δ 164.3, 136.4, 133.8, 132.3, 131.3, 123.6, 123.5, 53.3. HRMS Calculated for C<sub>10</sub>H<sub>8</sub>BrClO<sub>2</sub> (M+H) 274.9474, found: 274.9481.

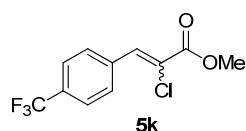

**5k** Methyl 2-chloro-3-(4-(trifluoromethyl)phenyl)acrylate<sup>1</sup>

Yield: 51%, white solid (*Z/E* = 9/1).

**Z-5k**<sup>1</sup>: <sup>1</sup>H NMR (400 MHz, CDCl<sub>3</sub>) δ 7.94 – 7.89 (m, 3H), 7.68 (d, *J* = 8.0 Hz, 2H), 3.92 (s, 3H). <sup>13</sup>C NMR (100 MHz, CDCl<sub>3</sub>) δ 163.5, 136.4, 135.6, 131.6 (q, *J* = 32.8 Hz), 130.7, 125.5 (d, *J* = 3.4 Hz), 124.3, 123.8 (q, *J* = 272.4 Hz), 53.7.

**E-5k**: <sup>1</sup>H NMR (400 MHz, CDCl<sub>3</sub>) δ 7.61 (d, *J* = 8.0 Hz, 2H), 7.43 – 7.38 (m, 2H), 7.25 (s, 1H), 3.76 (s, 3H). <sup>13</sup>C NMR (100 MHz, CDCl<sub>3</sub>) δ 163.4, 137.4, 136.2, 130.7 (q, *J* = 32.8 Hz), 128.8, 125.3 (d, *J* = 3.5 Hz), 124.9, 124.0 (q, *J* = 271.8 Hz), 53.0.

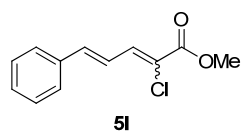

**5l** (*4E*)-Methyl 2-chloro-5-phenylpenta-2,4-dienoate<sup>1,2</sup>

Yield: 41%, *Z*: yellow solid, *E*: pale yellow oil (*Z/E* = 4/1).

(*2Z,4E*)-**5l**<sup>1</sup>: <sup>1</sup>H NMR (400 MHz, CDCl<sub>3</sub>) δ 7.63 (dd, *J* = 10.8, 0.6 Hz, 1H), 7.55 – 7.50 (m, 2H), 7.41 – 7.31 (m, 3H), 7.21 (dd, *J* = 15.7, 10.8 Hz, 1H), 7.01 (d, *J* = 15.7 Hz, 1H), 3.87 (s, 3H). <sup>13</sup>C NMR (100 MHz, CDCl<sub>3</sub>) δ 163.6, 142.3, 138.1, 135.9, 129.6, 129.0, 127.6, 122.9, 122.2, 53.2.

(*2E,4E*)-**5l**<sup>2</sup>: <sup>1</sup>H NMR (400 MHz, CDCl<sub>3</sub>) δ 7.86 (dd, *J* = 15.7, 11.5 Hz, 1H), 7.53 – 7.48 (m, 2H), 7.39 – 7.29 (m, 3H), 7.06 (dd, *J* = 11.5, 0.9 Hz, 1H), 6.82 (d, *J* = 15.7 Hz, 1H), 3.89 (s, 3H). <sup>13</sup>C NMR (100 MHz, CDCl<sub>3</sub>) δ 163.2, 142.6, 141.6, 136.1, 129.3, 128.8, 127.6, 124.0, 120.7, 52.8.

## 1.2 Preparations of (*Z*)-2-chloro-3-arylacrylic acids

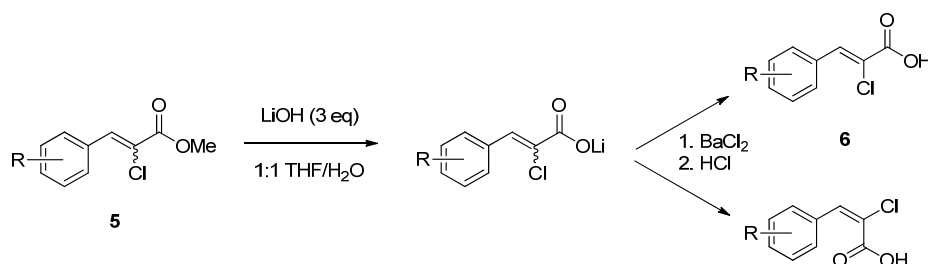

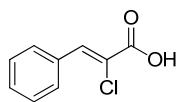

**6a** (Z)-2-Chloro-3-phenylacrylic acid<sup>8</sup>

To a solution of **5a** (15.3 g, 78.0 mmol, 1.0 eq.) in THF (100 mL), an aqueous solution (100 mL distilled water) of LiOH·H<sub>2</sub>O (9.8 g, 233.2 mmol, 3.0 eq.) was added, and the reaction mixture was stirred for 15 hours at room temperature. Most solvent was rotavapored off, distilled water was added until a clear solution formed. The aqueous solution was washed with DCM (10 mL), then an aqueous solution (80 mL) of BaCl<sub>2</sub>·2H<sub>2</sub>O (22.8 g, 93.0 mmol, 1.2 eq.) was added,<sup>9</sup> white precipitate formed immediately, filtered after 30 min, washed with distilled water in several portions. The white barium salt was suspended in 100 mL distilled water, acidified with concentrated HCl to pH=1. The mixture was extracted with EtOAc (100 mLx2), dried over Na<sub>2</sub>SO<sub>4</sub>. Solvent was removed under vacuum, the crude acid (12.8 g) was purified by recrystallization, and white long-needle crystal was obtained (7.8 g, 55% yield) from 30:1 Hexanes/EtOH. <sup>1</sup>H NMR (400 MHz, CDCl<sub>3</sub>) δ 8.05 (s, 1H), 7.91 – 7.88 (m, 2H), 7.48 – 7.44 (m, 3H). <sup>13</sup>C NMR (100 MHz, CDCl<sub>3</sub>) δ 169.1, 139.6, 132.7, 131.1, 131.0, 128.8, 121.0.

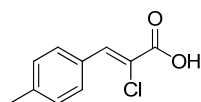

**6b** (Z)-2-Chloro-3-(p-tolyl)acrylic acid<sup>10</sup>

Recrystallized from 5.5:1 Hexanes/EtOH, white solid. Yield: 62%.  
<sup>1</sup>H NMR (400 MHz, DMSO) δ 13.59 (s, 1H), 7.91 (s, 1H), 7.81 (d, *J* = 8.1 Hz, 2H), 7.29 (d, *J* = 8.1 Hz, 2H), 2.34 (s, 3H). <sup>13</sup>C NMR (100 MHz, DMSO) δ 164.1, 140.5, 136.2, 130.6, 130.0, 129.4, 121.5, 21.2.

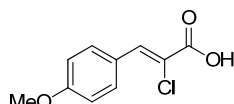

**6c** (Z)-2-Chloro-3-(4-methoxyphenyl)acrylic acid<sup>11</sup>

Recrystallized from 5:1 Hexanes/EtOH, white solid. Yield: 66%.  
<sup>1</sup>H NMR (400 MHz, DMSO) δ 13.49 (s, 1H), 7.94 – 7.89 (m, 3H), 7.07 – 7.02 (m, 2H), 3.81 (s, 3H).  
<sup>13</sup>C NMR (100 MHz, DMSO) δ 164.3, 160.9, 136.0, 132.7, 125.2, 119.7, 114.3, 55.4.

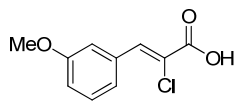

**6d** (Z)-2-Chloro-3-(3-methoxyphenyl)acrylic acid

Recrystallized from 30:1 Hexanes/EtOH, white needle crystal. Yield: 70%.  
<sup>1</sup>H NMR (400 MHz, CDCl<sub>3</sub>) δ 8.02 (s, 1H), 7.50 – 7.41 (m, 2H), 7.37 (t, *J* = 8.0 Hz, 1H), 7.01 (ddd, *J* = 8.0, 2.6, 0.8 Hz, 1H), 3.86 (s, 3H). <sup>13</sup>C NMR (100 MHz, CDCl<sub>3</sub>) δ 168.4, 159.6, 139.5, 133.9, 129.8, 123.9, 121.2, 117.0, 115.8, 55.5. HRMS Calculated for C<sub>10</sub>H<sub>9</sub>ClO<sub>3</sub> (M+Na) 235.0138, found: 235.0128.

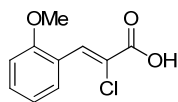

**6e** (Z)-2-Chloro-3-(2-methoxyphenyl)acrylic acid<sup>11</sup>

Recrystallized from 20:1 Hexanes/EtOH, pale yellow needle crystal. Yield: 52%.

<sup>1</sup>H NMR (400 MHz, CDCl<sub>3</sub>) δ 8.44 (s, 1H), 8.16 (dd, *J* = 7.8, 1.6 Hz, 1H), 7.45 – 7.38 (m, 1H), 7.07 – 7.00 (m, 1H), 6.94 (dd, *J* = 8.3, 0.7 Hz, 1H), 3.89 (s, 3H). <sup>13</sup>C NMR (100 MHz, CDCl<sub>3</sub>) δ 169.2, 158.4, 134.6, 132.3, 130.4, 121.7, 121.1, 120.4, 110.8, 55.8.

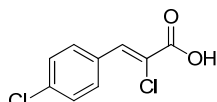

**6f** (Z)-2-Chloro-3-(4-chlorophenyl)acrylic acid<sup>11</sup>

Recrystallized from 6:1 Hexanes/EtOH, white needle crystal. Yield: 54%.

<sup>1</sup>H NMR (400 MHz, DMSO) δ 13.73 (s, 1H), 7.96 (s, 1H), 7.94 – 7.90 (m, 2H), 7.58 – 7.53 (m, 2H). <sup>13</sup>C NMR (101 MHz, DMSO) δ 163.7, 135.0, 134.8, 132.1, 131.6, 128.8, 123.2.

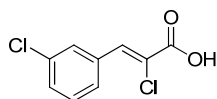

**6g** (Z)-2-Chloro-3-(3-chlorophenyl)acrylic acid<sup>12</sup>

Recrystallized from 30:1 Hexanes/EtOH, white needle crystal. Yield: 40%.

<sup>1</sup>H NMR (400 MHz, CDCl<sub>3</sub>) δ 7.98 (s, 1H), 7.90 (t, *J* = 1.6 Hz, 1H), 7.73 (dt, *J* = 7.2, 1.6 Hz, 1H), 7.45 – 7.36 (m, 2H). <sup>13</sup>C NMR (100 MHz, CDCl<sub>3</sub>) δ 168.2, 138.0, 134.8, 134.4, 130.8, 130.6, 130.0, 129.2, 122.5

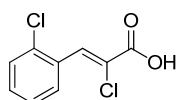

**6h** (Z)-2-Chloro-3-(2-chlorophenyl)acrylic acid<sup>12</sup>

Recrystallized from 30:1 Hexanes/EtOH, white crystal. Yield: 64%.

<sup>1</sup>H NMR (400 MHz, CDCl<sub>3</sub>) δ 8.34 (s, 1H), 8.06 – 8.01 (m, 1H), 7.50 – 7.45 (m, 1H), 7.41 – 7.33 (m, 2H). <sup>13</sup>C NMR (100 MHz, CDCl<sub>3</sub>) δ 168.2, 136.3, 135.2, 131.4, 131.2, 130.9, 129.9, 126.8, 123.8.

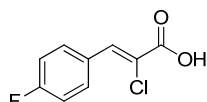

**6i** (Z)-2-Chloro-3-(4-fluorophenyl)acrylic acid

Recrystallized from 10:1 Hexanes/EtOH, white crystal. Yield: 51%.

<sup>1</sup>H NMR (400 MHz, DMSO) δ 13.66 (s, 1H), 8.04 – 7.93 (m, 3H), 7.38 – 7.28 (m, 2H). <sup>13</sup>C NMR (100 MHz, DMSO) δ 163.9, 162.8 (d, *J* = 249.6 Hz), 135.1, 132.9 (d, *J* = 8.6 Hz), 129.3 (d, *J* = 2.8 Hz), 122.3, 115.8 (d, *J* = 21.7 Hz). HRMS Calculated for C<sub>9</sub>H<sub>6</sub>ClFO<sub>2</sub> (M+Na) 201.0119, found: 201.0128.

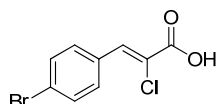

**6j** (Z)-3-(4-Bromophenyl)-2-chloroacrylic acid<sup>13</sup>

Recrystallized from 5:1 Hexanes/EtOH, pale yellow crystal. Yield: 62%.

<sup>1</sup>H NMR (400 MHz, DMSO)  $\delta$  13.73 (s, 1H), 7.94 (s, 1H), 7.86 – 7.80 (m, 2H), 7.71 – 7.65 (m, 2H).

<sup>13</sup>C NMR (100 MHz, DMSO)  $\delta$  163.7, 135.0, 132.2, 131.9, 131.7, 123.7, 123.3.

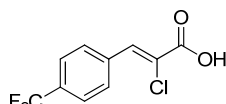

**6k** (Z)-2-Chloro-3-(4-(trifluoromethyl)phenyl)acrylic acid

Recrystallized from 10:1 Hexanes/EtOH, white crystal. Yield: 44%.

<sup>1</sup>H NMR (400 MHz, DMSO)  $\delta$  13.87 (s, 1H), 8.06 (d,  $J$  = 8.4 Hz, 2H), 8.05 (s, 1H), 7.84 (d,  $J$  = 8.4 Hz, 2H). <sup>13</sup>C NMR (100 MHz, DMSO)  $\delta$  163.5, 136.8, 134.8, 130.9, 129.8 (q,  $J$  = 32.1 Hz), 125.4 (d,  $J$  = 3.2 Hz), 125.1, 123.9 (q,  $J$  = 272.2 Hz). HRMS Calculated for C<sub>10</sub>H<sub>6</sub>ClF<sub>3</sub>O<sub>2</sub> (M+H) 251.0087, found:

251.0079.

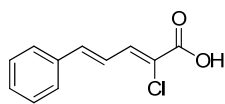

**6l** (2Z,4E)-2-Chloro-5-phenylpenta-2,4-dienoic acid<sup>11</sup>

*Z/E* Methyl esters could be completely separated by flash chromatography, *Z*-acid was obtained directly after hydrolysis, BaCl<sub>2</sub>·2H<sub>2</sub>O was not added. Yellow solid. Yield: 98%

<sup>1</sup>H NMR (400 MHz, DMSO)  $\delta$  13.42 (s, 1H), 7.68 (d,  $J$  = 10.6 Hz, 1H), 7.65 – 7.60 (m, 2H), 7.45 – 7.34 (m, 3H), 7.30 (d,  $J$  = 15.6 Hz, 1H), 7.16 (dd,  $J$  = 15.6, 10.6 Hz, 1H). <sup>13</sup>C NMR (100 MHz, DMSO)  $\delta$  163.5, 142.4, 137.3, 135.7, 129.6, 129.0, 127.6, 122.8, 122.5.

### 1.3 Preparations of 1a-n

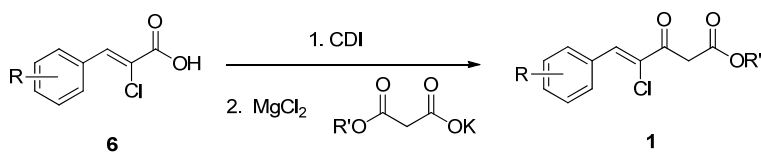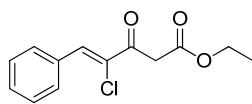

**1a** (Z)-Ethyl 4-chloro-3-oxo-5-phenylpent-4-enoate

To a solution of **6a** (16.7 g, 91.0 mmol, 1.0 eq.) in anhydrous THF (150 mL), CDI (17.9 g, 106.0 mmol, 1.1 eq.) was added in several portions, after addition, the reaction mixture was stirred at room temperature for 2 h. In another flask, MgCl<sub>2</sub> (10.5 g, 110.0 mmol, 1.2 eq.) and potassium 3-ethoxy-3-oxopropanoate (38.9 g, 229.0 mmol, 2.5 eq.) were suspended in anhydrous THF (150 mL) under nitrogen, stirred for 1 hour. To this white suspension, the acid-Im solution was added dropwise. After addition, the reaction mixture was stirred for 10 h then quenched by water, acidified with 2M HCl to pH=2, extracted with EtOAc (100 mLx2). Combined organic layer was washed with saturated



NaHCO<sub>3</sub> and brine, dried over Na<sub>2</sub>SO<sub>4</sub>. Solvent was removed and the crude product was purified by flash chromatography on silica gel (petrol ether/EtOAc = 50/1) to give 16.2 g product, as off-white solid. Yield: 70%. <sup>1</sup>H NMR (400 MHz, CDCl<sub>3</sub>) Ketone form: δ 7.88 – 7.84 (m, 2H), 7.82 (s, 1H), 7.47 – 7.43 (m, 3H), 4.24 (q, *J* = 7.2 Hz, 2H), 3.92 (s, 2H), 1.29 (t, *J* = 7.2 Hz, 3H). Enol form: δ 12.44 (s, 1H), 7.81 – 7.78 (m, 2H), 7.70 (s, 1H), 7.44 – 7.35 (m, 3H), 5.84 (s, 1H), 4.27 (q, *J* = 7.2 Hz, 2H), 1.34 (t, *J* = 7.2 Hz, 3H). <sup>13</sup>C NMR (100 MHz, CDCl<sub>3</sub>) δ 188.5, 173.1, 167.3, 167.0, 136.6, 133.6, 132.6, 131.2, 131.1, 130.8, 130.4, 129.5, 128.7, 128.6, 128.4, 124.0, 90.7, 61.6, 60.7, 45.9, 14.2, 14.1. HRMS Calculated for C<sub>13</sub>H<sub>13</sub>ClO<sub>3</sub> (M+Na) 275.0451, found: 275.0441.

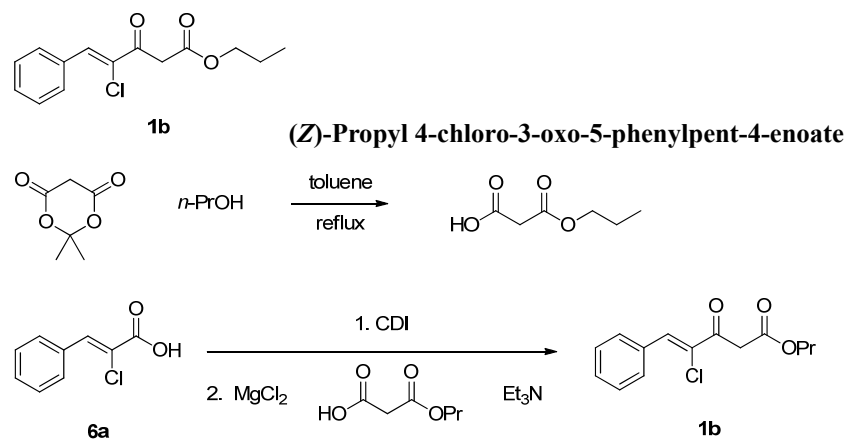

To a solution of **6a** (3.0 g, 16.4 mmol, 1.0 eq.) in anhydrous THF (50 mL), CDI (3.4 g, 90 wt%, 18.1 mmol, 1.1 eq.) was added in several portions, after addition, the reaction mixture was stirred at room temperature for 1 hour. In another flask, to a mixture of MgCl<sub>2</sub> (1.9 g, 19.7 mmol, 1.2 eq.) and 3-oxo-3-propoxypropanoic acid (6.7 g, 90 wt%, 41.1 mmol, 2.5 eq. prepared from 1:1 Meldrum's acid and *n*-PrOH in reflux toluene<sup>14</sup>) in anhydrous THF (50 mL) under nitrogen, Et<sub>3</sub>N solution (4.2 g, 41.1 mmol, 2.5 eq. in 10 mL THF) was added dropwise at 0 °C, then the reaction mixture was stirred for 1 hour at room temperature. To this white suspension, the acid-Im solution was added dropwise. After addition, the reaction mixture was stirred for 10 h then quenched by water, acidified with 2M HCl to pH=2, extracted with EtOAc (50 mLx2). Combined organic layer was washed with saturated NaHCO<sub>3</sub> and brine, dried over Na<sub>2</sub>SO<sub>4</sub>. Solvent was removed and the crude product was purified by flash chromatography on silica gel (petrol ether/EtOAc = 80/1) to give 1.1 g product, as pale yellow solid. Yield: 26%. <sup>1</sup>H NMR (400 MHz, CDCl<sub>3</sub>) Ketone form: δ 7.89 – 7.83 (m, 2H), 7.82 (s, 1H), 7.47 – 7.42 (m, 3H), 4.14 (t, *J* = 6.8 Hz, 2H), 3.92 (s, 2H), 1.68 (sex, *J* = 7.2 Hz, 2H), 0.94 (t, *J* = 7.6 Hz, 3H). Enol form: δ 12.44 (s, 1H), 7.81 – 7.77 (m, 2H), 7.70 (s, 1H), 7.42 – 7.34 (m, 3H), 5.85 (s, 1H), 4.17 (t, *J* = 6.8 Hz, 2H), 1.73 (sex, *J* = 7.2 Hz, 2H), 0.99 (t, *J* = 7.6 Hz, 3H). <sup>13</sup>C NMR (100 MHz, CDCl<sub>3</sub>) δ 188.7, 173.3, 167.4, 167.1, 136.6, 133.7, 132.6, 131.24, 131.15, 130.9, 130.5, 129.5, 128.8, 128.6, 128.5, 124.1, 90.8, 67.3, 66.4, 46.1, 22.1, 22.0, 10.5, 10.4. HRMS Calculated for C<sub>14</sub>H<sub>15</sub>ClO<sub>3</sub> (M+Na) 289.0607, found: 289.0608.

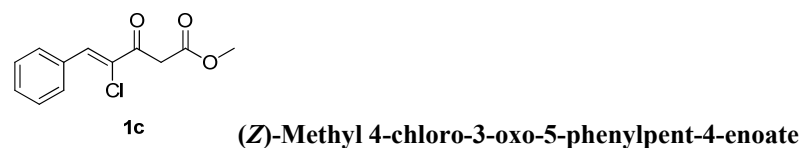

Same procedure with **1a** but potassium 3-methoxy-3-oxopropanoate was used. Yield: 83%, pale yellow

solid.  $^1\text{H}$  NMR (400 MHz,  $\text{CDCl}_3$ ) Ketone form:  $\delta$  7.89 – 7.84 (m, 2H), 7.82 (s, 1H), 7.47 – 7.42 (m, 3H), 3.94 (s, 2H), 3.78 (s, 3H). Enol form:  $\delta$  12.34 (s, 1H), 7.81 – 7.77 (m, 2H), 7.71 (s, 1H), 7.42 – 7.35 (m, 3H), 5.85 (s, 1H), 3.81 (s, 3H).  $^{13}\text{C}$  NMR (100 MHz,  $\text{CDCl}_3$ )  $\delta$  188.6, 173.5, 167.5, 167.4, 136.7, 133.7, 132.6, 131.4, 131.2, 130.9, 130.6, 129.6, 128.8, 128.5, 124.0, 90.4, 52.7, 51.8, 45.8. HRMS Calculated for  $\text{C}_{12}\text{H}_{11}\text{ClO}_3$  (M+Na) 261.0294, found: 261.0287.

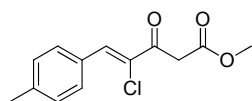

**1d**

**(Z)-Methyl 4-chloro-3-oxo-5-(p-tolyl)pent-4-enoate**

Yield: 80%, pale yellow solid.  $^1\text{H}$  NMR (400 MHz,  $\text{CDCl}_3$ ) Ketone form:  $\delta$  7.80 (s, 1H), 7.79 (d,  $J$  = 8.2 Hz, 2H), 7.26 (d,  $J$  = 8.2 Hz, 2H), 3.92 (s, 2H), 3.78 (s, 3H), 2.40 (s, 3H). Enol form:  $\delta$  12.35 (s, 1H), 7.71 (d,  $J$  = 8.2 Hz, 2H), 7.68 (s, 1H), 7.22 (d,  $J$  = 8.2 Hz, 2H), 5.83 (s, 1H), 3.81 (s, 3H), 2.39 (s, 3H).  $^{13}\text{C}$  NMR (100 MHz,  $\text{CDCl}_3$ )  $\delta$  188.5, 173.6, 167.7, 167.6, 141.7, 140.0, 136.8, 131.41, 131.35, 130.9, 130.6, 129.9, 129.5, 129.3, 127.6, 123.0, 90.1, 52.6, 51.7, 45.8, 21.7, 21.6. HRMS Calculated for  $\text{C}_{13}\text{H}_{13}\text{ClO}_3$  (M+Na) 275.0451, found: 275.0437.

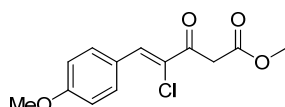

**1e**

**(Z)-Methyl 4-chloro-5-(4-methoxyphenyl)-3-oxopent-4-enoate**

Yield: 81%, yellow solid.  $^1\text{H}$  NMR (400 MHz,  $\text{CDCl}_3$ ) Ketone form:  $\delta$  7.92 – 7.87 (m, 2H), 7.78 (s, 1H), 6.99 – 6.94 (m, 2H), 3.92 (s, 2H), 3.87 (s, 3H), 3.77 (s, 3H). Enol form:  $\delta$  12.36 (s, 1H), 7.83 – 7.79 (m, 2H), 7.66 (s, 1H), 6.96 – 6.91 (m, 2H), 5.81 (s, 1H), 3.85 (s, 3H), 3.81 (s, 3H).  $^{13}\text{C}$  NMR (100 MHz,  $\text{CDCl}_3$ )  $\delta$  188.5, 173.6, 167.9, 167.7, 161.8, 160.7, 136.5, 133.5, 132.5, 131.0, 126.33, 126.27, 125.3, 121.6, 114.3, 114.0, 89.6, 55.5, 55.4, 52.6, 51.7, 45.8. HRMS Calculated for  $\text{C}_{13}\text{H}_{13}\text{ClO}_4$  (M+Na) 291.0400, found: 291.0398.

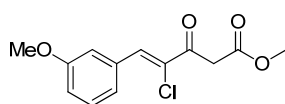

**1f**

**(Z)-Methyl 4-chloro-5-(3-methoxyphenyl)-3-oxopent-4-enoate**

Yield: 61%, yellow oil, frozen in freezer.  $^1\text{H}$  NMR (400 MHz,  $\text{CDCl}_3$ ) Ketone form:  $\delta$  7.79 (s, 1H), 7.46 – 7.44 (m, 1H), 7.43 – 7.40 (m, 1H), 7.39 – 7.34 (m, 2H), 3.93 (s, 2H), 3.85 (s, 3H), 3.78 (s, 3H). Enol form:  $\delta$  12.35 (s, 1H), 7.68 (s, 1H), 7.34 – 7.30 (m, 1H), 7.00 (ddd,  $J$  = 8.0, 2.8, 1.2 Hz, 2H), 6.96 – 6.91 (m, 1H), 5.85 (s, 1H), 3.84 (s, 3H), 3.81 (s, 3H).  $^{13}\text{C}$  NMR (100 MHz,  $\text{CDCl}_3$ )  $\delta$  188.5, 173.5, 167.5, 167.3, 159.6, 159.5, 136.6, 134.9, 133.8, 131.3, 129.7, 129.5, 128.6, 124.1, 124.0, 123.3, 116.9, 115.9, 115.5, 90.5, 55.4, 55.3, 52.6, 51.8, 45.7. HRMS Calculated for  $\text{C}_{13}\text{H}_{13}\text{ClO}_4$  (M+Na) 291.0400, found: 291.0403.

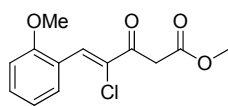

**1g**

**(Z)-Methyl 4-chloro-5-(2-methoxyphenyl)-3-oxopent-4-enoate**

Yield: 61%, yellow oil, gradually frozen in freezer.  $^1\text{H}$  NMR (400 MHz,  $\text{CDCl}_3$ ) Ketone form:  $\delta$  8.19 (s, 1H), 8.12 (dd,  $J = 8.0, 1.6$  Hz, 1H), 7.44 – 7.38 (m, 1H), 7.05 – 6.99 (m, 1H), 6.93 (d,  $J = 8.0$  Hz, 1H), 3.94 (s, 2H), 3.88 (s, 3H), 3.78 (s, 3H). Enol form:  $\delta$  12.34 (s, 1H), 8.02 (s, 1H), 8.00 (dd,  $J = 8.0, 1.6$  Hz, 1H), 7.38 – 7.32 (m, 1H), 7.03 – 6.97 (m, 1H), 6.92 (d,  $J = 8.0$  Hz, 1H), 5.83 (s, 1H), 3.87 (s, 3H), 3.81 (s, 3H).  $^{13}\text{C}$  NMR (100 MHz,  $\text{CDCl}_3$ )  $\delta$  188.1, 173.4, 167.6, 167.5, 158.4, 157.9, 132.3, 132.2, 130.9, 130.1, 130.0, 129.0, 126.6, 124.0, 122.4, 121.4, 120.2, 120.1, 110.6, 110.5, 90.0, 55.6, 55.5, 52.4, 51.6, 45.5. HRMS Calculated for  $\text{C}_{13}\text{H}_{13}\text{ClO}_4$  ( $\text{M}+\text{Na}$ ) 291.0400, found: 291.0410.

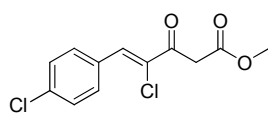

1h

**(Z)-Methyl 4-chloro-5-(4-chlorophenyl)-3-oxopent-4-enoate**

Yield: 65%, off-white solid.  $^1\text{H}$  NMR (400 MHz,  $\text{CDCl}_3$ ) Ketone form:  $\delta$  7.82 – 7.78 (m, 2H), 7.77 (s, 1H), 7.44 – 7.40 (m, 2H), 3.92 (s, 2H), 3.78 (s, 3H). Enol form:  $\delta$  12.33 (s, 1H), 7.75 – 7.71 (m, 2H), 7.65 (s, 1H), 7.40 – 7.36 (m, 2H), 5.84 (s, 1H), 3.81 (s, 3H).  $^{13}\text{C}$  NMR (100 MHz,  $\text{CDCl}_3$ )  $\delta$  188.5, 173.4, 167.4, 167.1, 136.9, 135.4, 135.2, 132.4, 132.1, 131.8, 131.0, 130.0, 129.1, 128.8, 124.5, 90.7, 52.7, 51.9, 45.7. HRMS Calculated for  $\text{C}_{12}\text{H}_{10}\text{Cl}_2\text{O}_3$  ( $\text{M}+\text{Na}$ ) 294.9905, found: 294.9905.

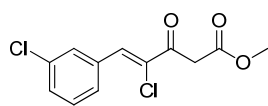

1i

**(Z)-Methyl 4-chloro-5-(3-chlorophenyl)-3-oxopent-4-enoate**

Yield: 68%, white solid.  $^1\text{H}$  NMR (400 MHz,  $\text{CDCl}_3$ ) Ketone form:  $\delta$  7.88 – 7.85 (m, 1H), 7.75 (s, 1H), 7.72 – 7.67 (m, 1H), 7.44 – 7.36 (m, 2H), 3.93 (s, 2H), 3.78 (s, 3H). Enol form:  $\delta$  12.32 (s, 1H), 7.82 – 7.78 (m, 1H), 7.64 (s, 1H), 7.64 – 7.59 (m, 1H), 7.36 – 7.32 (m, 2H), 5.86 (s, 1H), 3.82 (s, 3H).  $^{13}\text{C}$  NMR (100 MHz,  $\text{CDCl}_3$ )  $\delta$  188.4, 173.3, 167.3, 166.8, 135.3, 134.9, 134.7, 134.4, 134.2, 130.7, 130.6, 130.1, 129.9, 129.8, 129.7, 129.4, 129.2, 128.6, 125.3, 90.9, 52.7, 51.9, 45.7. HRMS Calculated for  $\text{C}_{12}\text{H}_{10}\text{Cl}_2\text{O}_3$  ( $\text{M}+\text{Na}$ ) 294.9905, found: 294.9897.

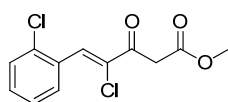

1j

**(Z)-Methyl 4-chloro-5-(2-chlorophenyl)-3-oxopent-4-enoate**

Yield: 51%, white solid.  $^1\text{H}$  NMR (400 MHz,  $\text{CDCl}_3$ ) Ketone form:  $\delta$  8.07 (s, 1H), 7.39 – 7.33 (m, 2H), 7.33 – 7.28 (m, 2H), 3.95 (s, 2H), 3.79 (s, 3H). Enol form:  $\delta$  12.31 (s, 1H), 8.00 – 7.96 (m, 1H), 7.93 (s, 1H), 7.90 – 7.85 (m, 1H), 7.49 – 7.42 (m, 2H), 5.86 (s, 1H), 3.82 (s, 3H).  $^{13}\text{C}$  NMR (100 MHz,  $\text{CDCl}_3$ )  $\delta$  188.0, 173.4, 167.3, 166.8, 135.4, 134.8, 133.8, 132.3, 131.4, 131.24, 131.16, 130.9, 130.8, 130.3, 129.9, 129.7, 128.6, 126.7, 126.6, 126.5, 91.2, 52.8, 51.9, 45.8. HRMS Calculated for  $\text{C}_{12}\text{H}_{10}\text{Cl}_2\text{O}_3$  ( $\text{M}+\text{Na}$ ) 294.9905, found: 294.9900.

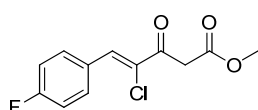

1k

**(Z)-Methyl 4-chloro-5-(4-fluorophenyl)-3-oxopent-4-enoate**

Yield: 59%, off-white solid.  $^1\text{H}$  NMR (400 MHz,  $\text{CDCl}_3$ ) Ketone form:  $\delta$  7.92 – 7.86 (m, 2H), 7.79 (s, 1H), 7.17 – 7.11 (m, 2H), 3.92 (s, 2H), 3.78 (s, 3H). Enol form:  $\delta$  12.34 (s, 1H), 7.83 – 7.77 (m, 2H), 7.66 (s, 1H), 7.12 – 7.07 (m, 2H), 5.84 (s, 1H), 3.81 (s, 3H).  $^{13}\text{C}$  NMR (100 MHz,  $\text{CDCl}_3$ )  $\delta$  188.5, 173.5, 167.5, 167.2, 163.5 (d,  $J = 253.8$  Hz), 163.1 (d,  $J = 251.4$  Hz), 135.3, 133.4 (d,  $J = 8.6$  Hz), 132.6 (d,  $J = 8.3$  Hz), 130.1, 129.9 (d,  $J = 2.2$  Hz), 128.8 (d,  $J = 2.2$  Hz), 128.1, 123.6, 116.0 (d,  $J = 21.8$  Hz), 115.7 (d,  $J = 21.7$  Hz), 90.4, 52.65, 51.8, 45.7. HRMS Calculated for  $\text{C}_{12}\text{H}_{10}\text{ClFO}_3$  (M+Na) 279.0200, found: 279.0194.

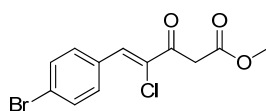

**1l**

**(Z)-Methyl 5-(4-bromophenyl)-4-chloro-3-oxopent-4-enoate**

Yield: 64%, off-white solid.  $^1\text{H}$  NMR (400 MHz,  $\text{CDCl}_3$ ) Ketone form:  $\delta$  7.75 (s, 1H), 7.75 – 7.71 (m, 2H), 7.60 – 7.56 (m, 2H), 3.92 (s, 2H), 3.78 (s, 3H). Enol form:  $\delta$  12.33 (s, 1H), 7.68 – 7.64 (m, 2H), 7.63 (s, 1H), 7.56 – 7.52 (m, 2H), 5.85 (s, 1H), 3.82 (s, 3H).  $^{13}\text{C}$  NMR (100 MHz,  $\text{CDCl}_3$ )  $\delta$  188.4, 173.4, 167.4, 167.0, 135.2, 132.5, 132.0, 131.9, 131.8, 131.4, 130.1, 128.9, 125.4, 124.6, 123.8, 90.7, 52.7, 51.9, 45.7. HRMS Calculated for  $\text{C}_{12}\text{H}_{10}\text{BrClO}_3$  (M+Na) 338.9400, found: 338.9391.

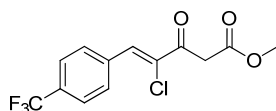

**1m**

**(Z)-Methyl 4-chloro-3-oxo-5-(4-(trifluoromethyl)phenyl)pent-4-enoate**

Yield: 48%, off-white solid.  $^1\text{H}$  NMR (400 MHz,  $\text{CDCl}_3$ ) Ketone form:  $\delta$  7.93 (d,  $J = 8.4$  Hz, 2H), 7.84 (s, 1H), 7.70 (d,  $J = 8.4$  Hz, 2H), 3.95 (s, 2H), 3.79 (s, 3H). Enol form:  $\delta$  12.34 (s, 1H), 7.86 (d,  $J = 8.4$  Hz, 2H), 7.72 (s, 1H), 7.66 (d,  $J = 8.4$  Hz, 2H), 5.88 (s, 1H), 3.83 (s, 3H).  $^{13}\text{C}$  NMR (100 MHz,  $\text{CDCl}_3$ )  $\delta$  188.4, 173.3, 167.3, 166.6, 137.1, 136.0, 134.6, 132.0 (q,  $J = 32.5$  Hz), 131.1, 130.9 (q,  $J = 32.5$  Hz), 130.6, 130.4, 129.7, 126.2, 125.6 (d,  $J = 3.2$  Hz), 125.4 (d,  $J = 3.2$  Hz), 123.9 (q,  $J = 272.3$  Hz), 123.8 (q,  $J = 272.7$  Hz), 91.3, 52.7, 51.9, 45.7. HRMS Calculated for  $\text{C}_{13}\text{H}_{10}\text{ClF}_3\text{O}_3$  (M+Na) 329.0168, found: 329.0177.

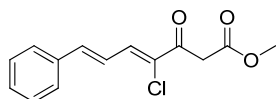

**1n**

**(4Z,6E)-Methyl 4-chloro-3-oxo-7-phenylhepta-4,6-dienoate**

Yield: 89%, yellow solid.  $^1\text{H}$  NMR (400 MHz,  $\text{CDCl}_3$ ) Ketone form:  $\delta$  7.57 (d,  $J = 10.4$  Hz, 1H), 7.56 – 7.53 (m, 2H), 7.42 – 7.37 (m, 3H), 7.22 (dd,  $J = 15.6, 10.4$  Hz, 1H), 7.11 (d,  $J = 15.6$  Hz, 1H), 3.86 (s, 2H), 3.77 (s, 3H). Enol form:  $\delta$  12.19 (s, 1H), 7.53 – 7.49 (m, 2H), 7.45 (d,  $J = 10.8$  Hz, 1H), 7.38 – 7.29 (m, 3H), 7.23 (dd,  $J = 15.6, 10.8$  Hz, 1H), 6.96 (d,  $J = 15.6$  Hz, 1H), 5.75 (s, 1H), 3.80 (s, 3H).  $^{13}\text{C}$  NMR (100 MHz,  $\text{CDCl}_3$ )  $\delta$  187.3, 173.4, 167.5, 166.7, 144.5, 140.6, 137.8, 136.3, 135.8, 132.2, 130.0, 129.4, 129.2, 129.0, 128.9, 127.8, 127.4, 124.8, 123.3, 122.9, 90.2, 52.6, 51.7, 45.7. HRMS Calculated for  $\text{C}_{14}\text{H}_{13}\text{ClO}_3$  (M+Na) 287.0451, found: 287.0443.

## 2. Preparations of 3a-c and their spectra data

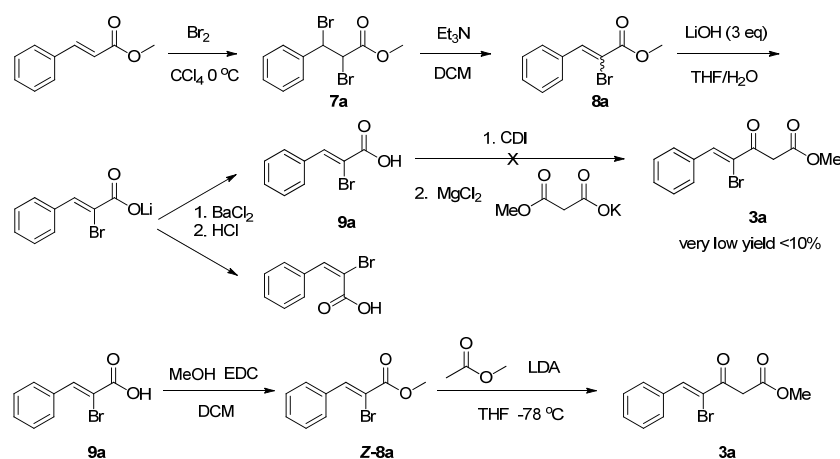

It was failed while preparing **3** using the same procedure as **1**, the yield of last step was very low (<10%). Condensation with methyl acetate gave **3a** in 66% yield.

**3b** and **3c** were prepared in similar route.

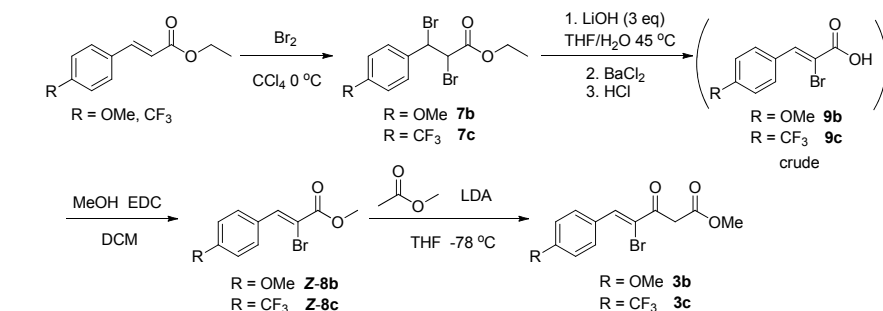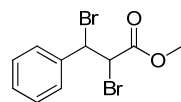

**7a** Methyl 2,3-dibromo-3-phenylpropanoate<sup>15</sup>

To a solution of methyl cinnamate (150.0 g, 925.0 mmol, 1.0 eq.) in CCl<sub>4</sub> (400 mL), bromine (155.0 g, 971.0 mmol, 1.05 eq.) was added dropwise at 0 °C, precipitate formed gradually. After addition, the reaction mixture was stirred for 2 h at room temperature. DCM was added to dissolve the solid, and then washed with saturated NaHSO<sub>3</sub> solution and brine, dried over Na<sub>2</sub>SO<sub>4</sub>. Solvent was rotavapored off, the crude product was recrystallized by Hexanes and DCM to give pure **7** (253.5 g, 85% yield) as white crystal. <sup>1</sup>H NMR (400 MHz, CDCl<sub>3</sub>) δ 7.42 – 7.34 (m, 5H), 5.34 (d, *J* = 11.8 Hz, 1H), 4.85 (d, *J* = 11.8 Hz, 1H), 3.90 (s, 3H). <sup>13</sup>C NMR (100 MHz, CDCl<sub>3</sub>) δ 168.4, 137.6, 129.5, 129.0, 128.2, 53.6, 50.7, 46.8.

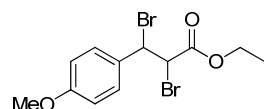

**7b** Ethyl 2,3-dibromo-3-(4-methoxyphenyl)propanoate<sup>16</sup>

Precipitated from CCl<sub>4</sub>, filtered and wash with small portions of cold CCl<sub>4</sub>, pure enough for next step. Yield: 75%. White solid. <sup>1</sup>H NMR (400 MHz, CDCl<sub>3</sub>) δ 7.36 – 7.31 (m, 2H), 6.93 – 6.88 (m, 2H), 5.36 (d, *J* = 11.8 Hz, 1H), 4.82 (d, *J* = 11.8 Hz, 1H), 4.35 (q, *J* = 7.1 Hz, 2H), 3.83 (s, 3H), 1.38 (t, *J* = 7.1 Hz, 3H). <sup>13</sup>C NMR (100 MHz, CDCl<sub>3</sub>) δ 168.0, 160.2, 129.7, 129.4, 114.3, 62.7, 55.4, 51.2, 47.4, 14.0.

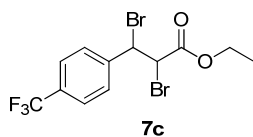

**Ethyl 2,3-dibromo-3-(4-(trifluoromethyl)phenyl)propanoate**

No precipitate formed during addition of bromine. Purified by flash chromatography (Hexanes/EtOAc = 50/1). Yield: 70%. White solid.  $^1\text{H NMR}$  (400 MHz,  $\text{CDCl}_3$ )  $\delta$  7.66 (d,  $J = 8.2$  Hz, 2H), 7.53 (d,  $J = 8.2$  Hz, 2H), 5.36 (d,  $J = 11.8$  Hz, 1H), 4.79 (d,  $J = 11.8$  Hz, 1H), 4.37 (q,  $J = 7.1$  Hz, 2H), 1.38 (t,  $J = 7.1$  Hz, 3H).  $^{13}\text{C NMR}$  (100 MHz,  $\text{CDCl}_3$ )  $\delta$  167.6, 141.6, 131.4 (q,  $J = 32.7$  Hz), 128.6, 126.0 (d,  $J = 3.4$  Hz), 123.8 (q,  $J = 272.4$  Hz), 62.9, 49.1, 46.5, 14.0.

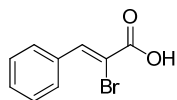

**(Z)-2-Bromo-3-phenylacrylic acid**<sup>17</sup>

To a solution of **7a** (34.4 g, 107.0 mmol, 1.0 eq.) in DCM (200 mL),  $\text{Et}_3\text{N}$  (17.1 g, 169.0 mmol, 1.6 eq.) was added dropwise. The reaction mixture was stirred for 12 h at room temperature, and then washed with 3 M HCl and brine. DCM was rotavapored off, the crude product ( $Z/E = 1/1.8$ ) was dissolved with THF (100 mL), and an aqueous solution (80 mL distilled water) of  $\text{LiOH}\cdot\text{H}_2\text{O}$  (13.5 g, 321.0 mmol, 3.0 eq.) was added, and the reaction mixture was stirred for 15 hours at room temperature. Most solvent was rotavapored off, distilled water was added until a clear solution formed. The aqueous solution was washed with DCM (10 mL), then an aqueous solution (100 mL) of  $\text{BaCl}_2\cdot 2\text{H}_2\text{O}$  (31.3 g, 128.1 mmol, 1.2 eq.) was added, white precipitate formed immediately, filtered after 30 min, washed with distilled water in several portions. The white barium salt was suspended in 100 mL distilled water, acidified with concentrated HCl to pH=1. The mixture was extracted with EtOAc (100 mLx2), dried over  $\text{Na}_2\text{SO}_4$ . Solvent was removed under vacuum, the crude acid (7.6 g) was purified by recrystallization, and white long-needle crystal was obtained (5.2 g, 69% yield) from 30:1 Hexanes/EtOH.  $^1\text{H NMR}$  (400 MHz,  $\text{CDCl}_3$ )  $\delta$  8.36 (s, 1H), 7.94 – 7.87 (m, 2H), 7.48 – 7.42 (m, 3H).  $^{13}\text{C NMR}$  (100 MHz,  $\text{CDCl}_3$ )  $\delta$  169.2, 143.6, 133.4, 131.0, 130.8, 128.7, 111.6.

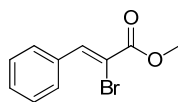

**(Z)-Methyl 2-bromo-3-phenylacrylate**<sup>18</sup>

Some esterification methods were tired and EDC was chosen because it could minimize the  $Z/E$  isomerization. To a suspension of acid **9a** (2.8 g, 12.3 mmol, 1.0 eq.) in DCM (30 mL), EDC (2.8 g, 14.8 mmol, 1.2 eq.) was added in several portions at 0 °C. The reaction mixture was stirred for 30 min, and then MeOH (15 mL) was added, stirred for 24 h. Solvent was rotavapored off, the residual was dissolved with DCM (30 mL), washed with 5% HCl and brine, dried over  $\text{Na}_2\text{SO}_4$ . The solvent was removed under vacuum, and the crude product was purified by flash chromatography (Hexanes/EtOAc = 30/1), 2.5 g (85% yield) pale yellow oil was obtained.  $^1\text{H NMR}$  (400 MHz,  $\text{CDCl}_3$ )  $\delta$  8.23 (s, 1H), 7.89 – 7.82 (m, 2H), 7.47 – 7.39 (m, 3H), 3.91 (s, 3H).  $^{13}\text{C NMR}$  (100 MHz,  $\text{CDCl}_3$ )  $\delta$  163.7, 141.0, 133.5, 130.24, 130.20, 128.4, 112.4, 53.5.

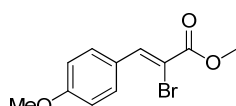

**(Z)-Methyl 2-bromo-3-(4-methoxyphenyl)acrylate**<sup>19</sup>

Yield: 45% based on crude *Z*-acid **9b**. White solid. <sup>1</sup>H NMR (400 MHz, CDCl<sub>3</sub>) δ 8.18 (s, 1H), 7.95 – 7.84 (m, 2H), 6.98 – 6.88 (m, 2H), 3.89 (s, 3H), 3.86 (s, 3H). <sup>13</sup>C NMR (100 MHz, CDCl<sub>3</sub>) δ 164.2, 161.3, 140.7, 132.6, 126.2, 114.0, 109.6, 55.5, 53.6.

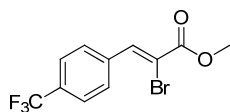

**Z-8c** (Z)-Methyl 2-bromo-3-(4-(trifluoromethyl)phenyl)acrylate

Yield: 40% based on crude *Z*-acid **9c**. Off-white solid. <sup>1</sup>H NMR (400 MHz, CDCl<sub>3</sub>) δ 8.24 (s, 1H), 7.91 (d, *J* = 8.4 Hz, 2H), 7.68 (d, *J* = 8.4 Hz, 2H), 3.92 (s, 3H). <sup>13</sup>C NMR (100 MHz, CDCl<sub>3</sub>) δ 163.5, 139.6, 137.3, 131.6 (q, *J* = 32.6 Hz), 130.4, 125.5 (d, *J* = 3.5 Hz), 123.9 (q, *J* = 272.1 Hz), 115.3, 53.9.

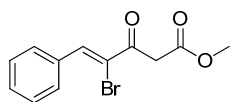

**3a** (Z)-Methyl 4-bromo-3-oxo-5-phenylpent-4-enoate

To a solution of diisopropylamine (2.0 g, 20.1 mmol, 2.55 eq.) in anhydrous THF (20 mL) under nitrogen, *n*-BuLi (2.4 M in hexane, 8.2 mL, 19.7 mmol, 2.5 eq.) was added dropwise at -10 °C, after addition, stirred for 30 min at -5~0 °C. Cooled down to -65 °C, methyl acetate (1.5 g, 19.7 mmol, 2.5 eq.) solution (5 mL anhydrous THF) was added dropwise, keeping temperature below -60 °C. After addition, stirred for 20 min at -65~-55 °C. Cooled down again to -78 °C, a solution of **8a** (1.9 g, 7.9 mmol, 1.0 eq.) in anhydrous THF (10 mL) was added dropwise, keeping temperature below -70 °C. After addition, the reaction mixture was stirred for 20 min at -70~-65 °C, then warmed to -60~-55 °C for another 30 min. When the reaction was completed, monitored by TLC, poured into 2 M HCl (50 mL) and ether (50 mL), organic layer was separated, washed with saturated NaHCO<sub>3</sub> and brine, dried over Na<sub>2</sub>SO<sub>4</sub>. Solvent was rotavapored off, the residual was purified by flash chromatography (Hexanes/EtOAc = 40/1), 1.5 g (66% yield) yellow oil was obtained. <sup>1</sup>H NMR (400 MHz, CDCl<sub>3</sub>) Ketone form: δ 8.09 (s, 1H), 7.91 – 7.85 (m, 2H), 7.47 – 7.43 (m, 3H), 3.99 (s, 2H), 3.78 (s, 3H). Enol form: δ 12.42 (s, 1H), 8.01 (s, 1H), 7.79 – 7.75 (m, 2H), 7.43 – 7.36 (m, 3H), 5.91 (s, 1H), 3.82 (s, 3H). <sup>13</sup>C NMR (100 MHz, CDCl<sub>3</sub>) δ 188.1, 173.3, 167.8, 167.4, 141.0, 135.0, 134.4, 133.2, 130.8, 130.6, 130.0, 129.4, 128.5, 128.2, 120.9, 114.9, 92.1, 52.5, 51.7, 45.8. HRMS Calculated for C<sub>12</sub>H<sub>11</sub>BrO<sub>3</sub> (M+Na) 304.9789, found: 304.9794.

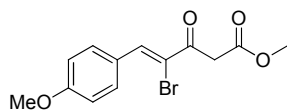

**3b** (Z)-Methyl 4-bromo-5-(4-methoxyphenyl)-3-oxopent-4-enoate

Yield: 80%. Pale yellow solid. <sup>1</sup>H NMR (400 MHz, CDCl<sub>3</sub>) Ketone form: δ 8.05 (s, 1H), 7.97 – 7.92 (m, 2H), 6.99 – 6.95 (m, 2H), 3.98 (s, 2H), 3.87 (s, 3H), 3.77 (s, 3H). Enol form: δ 12.45 (s, 1H), 7.85 – 7.80 (m, 2H), 6.95 – 6.92 (m, 2H), 5.87 (s, 1H), 3.85 (s, 3H), 3.81 (s, 3H). <sup>13</sup>C NMR (100 MHz, CDCl<sub>3</sub>) δ 188.3, 173.6, 167.8, 166.6, 161.9, 160.7, 140.8, 134.7, 133.2, 132.3, 130.8, 127.0, 125.8, 118.3, 114.2, 113.9, 91.5, 55.6, 55.4, 52.7, 51.8, 46.1. HRMS Calculated for C<sub>13</sub>H<sub>13</sub>BrO<sub>4</sub> (M+Na) 334.9895, found: 334.9897.

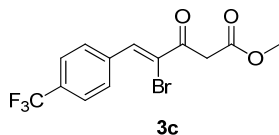

**(Z)-Methyl 4-bromo-3-oxo-5-(4-(trifluoromethyl)phenyl)pent-4-enoate**

Yield: 54%. Pale yellow solid. <sup>1</sup>H NMR (400 MHz, CDCl<sub>3</sub>) Ketone form: δ 8.11 (s, 1H), 7.93 (dd, *J* = 8.2, 0.6 Hz, 2H), 7.70 (d, *J* = 8.2 Hz, 2H), 4.00 (s, 2H), 3.79 (s, 3H). Enol form: δ 12.42 (s, 1H), 8.02 (s, 1H), 7.83 (dd, *J* = 8.2, 0.6 Hz, 2H), 7.66 (d, *J* = 8.2 Hz, 2H), 5.93 (s, 1H), 3.83 (s, 3H). <sup>13</sup>C NMR (100 MHz, CDCl<sub>3</sub>) δ 188.2, 173.2, 167.3, 167.1, 139.0, 138.1, 136.9, 133.5, 131.8 (q, *J* = 32.7 Hz), 130.7 (q, *J* = 32.7 Hz), 130.6, 130.1, 125.4 (d, *J* = 3.3 Hz), 125.2 (d, *J* = 3.3 Hz), 123.9 (q, *J* = 272.3 Hz), 123.7 (q, *J* = 272.2 Hz), 123.0, 117.4, 93.0, 52.6, 51.8, 45.9. HRMS Calculated for C<sub>13</sub>H<sub>10</sub>BrF<sub>3</sub>O<sub>3</sub> (M+Na) 372.9663, found: 372.9667.

### 3. Typical procedure for the asymmetric hydrogenation

To a 20 mL Schlenk tube were added [Ru(benzene)Cl<sub>2</sub>]<sub>2</sub> (5.0 mg, 0.01 mmol) and (*S*)-SunPhos (14.8 mg, 0.022 mmol) under nitrogen. The tube was vacuumed and purged with nitrogen again before addition of freshly distilled and freeze-and-thaw degassed EtOH/CH<sub>2</sub>Cl<sub>2</sub> (2 mL/2 mL). The resulting mixture was heated at 50 °C for 1 h and then cooled to room temperature. The solvent was then removed under vacuum to give the catalyst as a brownish yellow solid. The catalyst was dissolved in degassed MeOH (8 mL) and then the solution was equally divided into 4 vials which contained 1 mmol substrates (2 mL MeOH each). Then the vials were taken into an autoclave. The autoclave was purged three times with H<sub>2</sub> and the required pressure of H<sub>2</sub> was set. The autoclave was stirred under specified reaction conditions. After being cooled to ambient temperature and careful release of the hydrogen, the autoclave was opened and the solvent was evaporated. The enantiomeric excess was determined by HPLC on Chiralpak IC-3 column after passing the samples through a short pad of silica gel eluted with petroleum ether and ethyl acetate.

### 4. Spectra and HPLC data of 2a-n and 4a-c

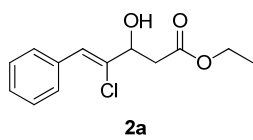

**(Z)-Ethyl 4-chloro-3-hydroxy-5-phenylpent-4-enoate**

Colorless oil. <sup>1</sup>H NMR (400 MHz, CDCl<sub>3</sub>) δ 7.65 – 7.60 (m, 2H), 7.40 – 7.27 (m, 3H), 6.91 (s, 1H), 4.79 – 4.74 (m, 1H), 4.20 (q, *J* = 7.2 Hz, 2H), 3.34 (d, *J* = 5.0 Hz, 1H), 2.90 – 2.74 (m, 2H), 1.29 (t, *J* = 7.2 Hz, 3H). <sup>13</sup>C NMR (100 MHz, CDCl<sub>3</sub>) δ 171.9, 134.0, 133.6, 129.3, 128.3, 128.2, 125.1, 72.5, 61.1, 40.0, 14.2. HPLC (Chiralpak IC-3 column, hexane/*i*-PrOH 95/5, 1.0 mL min<sup>-1</sup>, 254 nm): *t*<sub>1</sub> = 12.7 min, *t*<sub>2</sub> = 15.3 min or hexane/*i*-PrOH 97/3, 0.7 mL min<sup>-1</sup>, 254 nm, *t*<sub>1</sub> = 26.7 min, *t*<sub>2</sub> = 33.5 min. HRMS Calculated for C<sub>13</sub>H<sub>15</sub>ClO<sub>3</sub> (M+Na) 277.0607, found: 277.0597.



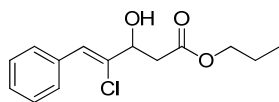

2b

**(Z)-Propyl 4-chloro-3-hydroxy-5-phenylpent-4-enoate**

Yellow oil.  $^1\text{H}$  NMR (400 MHz,  $\text{CDCl}_3$ )  $\delta$  7.65 – 7.60 (m, 2H), 7.40 – 7.27 (m, 3H), 6.91 (s, 1H), 4.80 – 4.73 (m, 1H), 4.11 (td,  $J = 6.8$  Hz, 1.2 Hz, 2H), 3.36 (d,  $J = 4.8$  Hz, 1H), 2.92 – 2.74 (m, 2H), 1.67 (sex,  $J = 7.2$  Hz, 2H), 0.95 (t,  $J = 7.6$  Hz, 3H).  $^{13}\text{C}$  NMR (100 MHz,  $\text{CDCl}_3$ )  $\delta$  172.1, 134.1, 133.5, 129.4, 128.34, 128.26, 125.3, 72.6, 66.8, 40.0, 22.0, 10.4. HPLC (Chiralpak IC-3 column, hexane/*i*-PrOH 97/3, 0.7 mL  $\text{min}^{-1}$ , 254 nm):  $t_1 = 22.8$  min,  $t_2 = 28.5$  min. HRMS Calculated for  $\text{C}_{14}\text{H}_{17}\text{ClO}_3$  (M+Na) 291.0764, found: 291.0767.

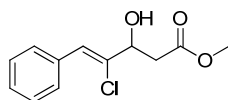

2c

**(Z)-Methyl 4-chloro-3-hydroxy-5-phenylpent-4-enoate**

Pale yellow oil.  $^1\text{H}$  NMR (400 MHz,  $\text{CDCl}_3$ )  $\delta$  7.65 – 7.61 (m, 2H), 7.40 – 7.34 (m, 2H), 7.33 – 7.27 (m, 1H), 6.91 (s, 1H), 4.81 – 4.75 (m, 1H), 3.75 (s, 3H), 3.30 (d,  $J = 5.1$  Hz, 1H), 2.92 – 2.75 (m, 2H).  $^{13}\text{C}$  NMR (100 MHz,  $\text{CDCl}_3$ )  $\delta$  172.4, 134.1, 133.5, 129.4, 128.34, 128.28, 125.3, 72.6, 52.2, 39.9. The *Z*-olefin was confirmed by 1D-NOE. HPLC (Chiralpak IC-3 column, hexane/*i*-PrOH 97/3, 0.7 mL  $\text{min}^{-1}$ , 254 nm):  $t_1 = 29.2$  min,  $t_2 = 35.0$  min. HRMS Calculated for  $\text{C}_{12}\text{H}_{13}\text{ClO}_3$  (M+Na) 263.0451, found: 263.0444.

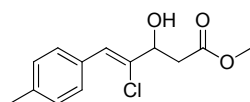

2d

**(Z)-Methyl 4-chloro-3-hydroxy-5-(p-tolyl)pent-4-enoate**

White solid.  $^1\text{H}$  NMR (400 MHz,  $\text{CDCl}_3$ )  $\delta$  7.56 – 7.51 (m, 2H), 7.20 – 7.14 (m, 2H), 6.86 (s, 1H), 4.80 – 4.73 (m, 1H), 3.74 (s, 3H), 3.25 (d,  $J = 5.0$  Hz, 1H), 2.91 – 2.74 (m, 2H), 2.36 (s, 3H).  $^{13}\text{C}$  NMR (100 MHz,  $\text{CDCl}_3$ )  $\delta$  172.3, 138.2, 132.6, 131.2, 129.3, 129.0, 125.2, 72.6, 52.1, 39.9, 21.4. HPLC (Chiralpak IC-3 column, hexane/*i*-PrOH 95/5, 0.7 mL  $\text{min}^{-1}$ , 254 nm):  $t_1 = 21.3$  min,  $t_2 = 25.6$  min. HRMS Calculated for  $\text{C}_{13}\text{H}_{15}\text{ClO}_3$  (M+Na) 277.0607, found: 277.0585.

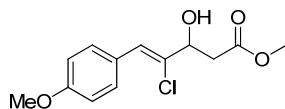

2e

**(Z)-Methyl 4-chloro-3-hydroxy-5-(4-methoxyphenyl)pent-4-enoate**

White solid.  $^1\text{H}$  NMR (400 MHz,  $\text{CDCl}_3$ )  $\delta$  7.65 – 7.59 (m, 2H), 6.93 – 6.87 (m, 2H), 6.82 (s, 1H), 4.80 – 4.72 (m, 1H), 3.82 (s, 3H), 3.74 (s, 3H), 3.21 (d,  $J = 4.9$  Hz, 1H), 2.90 – 2.75 (m, 2H).  $^{13}\text{C}$  NMR (100 MHz,  $\text{CDCl}_3$ )  $\delta$  172.4, 159.5, 131.4, 130.8, 126.6, 124.8, 113.7, 72.7, 55.3, 52.1, 39.9. HPLC (Chiralpak IC-3 column, hexane/*i*-PrOH 95/5, 0.9 mL  $\text{min}^{-1}$ , 254 nm):  $t_1 = 28.4$  min,  $t_2 = 34.4$  min. HRMS Calculated for  $\text{C}_{13}\text{H}_{15}\text{ClO}_4$  (M+Na) 293.0557, found: 293.0566.

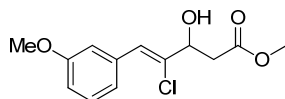

2f

**(Z)-Methyl 4-chloro-3-hydroxy-5-(3-methoxyphenyl)pent-4-enoate**

Pale yellow oil.  $^1\text{H}$  NMR (400 MHz,  $\text{CDCl}_3$ )  $\delta$  7.28 (t,  $J = 8.0$  Hz, 1H), 7.23 – 7.21 (m, 1H), 7.20 – 7.16 (m, 1H), 6.88 (s, 1H), 6.86 (ddd,  $J = 8.0, 2.6, 1.0$  Hz, 1H), 4.79 – 4.74 (m, 1H), 3.82 (s, 3H), 3.74 (s, 3H), 3.32 (d,  $J = 5.0$  Hz, 1H), 2.92 – 2.74 (m, 2H).  $^{13}\text{C}$  NMR (100 MHz,  $\text{CDCl}_3$ )  $\delta$  172.2, 159.3, 135.3, 133.8, 129.2, 125.0, 122.0, 114.6, 114.0, 72.5, 55.2, 52.0, 39.9. HPLC (Chiralpak IC-3 column, hexane/*i*-PrOH 95/5, 0.9 mL  $\text{min}^{-1}$ , 254 nm):  $t_1 = 24.1$  min,  $t_2 = 28.8$  min. HRMS Calculated for  $\text{C}_{13}\text{H}_{15}\text{ClO}_4$  (M+Na) 293.0557, found: 293.0546.

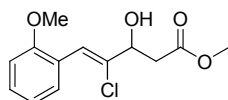

2g

**(Z)-Methyl 4-chloro-3-hydroxy-5-(2-methoxyphenyl)pent-4-enoate**

Pale yellow oil.  $^1\text{H}$  NMR (400 MHz,  $\text{CDCl}_3$ )  $\delta$  7.82 (dd,  $J = 7.6, 1.2$  Hz, 1H), 7.31 – 7.26 (m, 1H), 6.97 (td,  $J = 7.6, 1.2$  Hz, 1H), 6.88 (dd,  $J = 8.2, 1.2$  Hz, 1H), 4.85 – 4.79 (m, 1H), 3.83 (s, 3H), 3.75 (s, 3H), 3.14 (d,  $J = 5.0$  Hz, 1H), 2.91 – 2.78 (m, 2H).  $^{13}\text{C}$  NMR (100 MHz,  $\text{CDCl}_3$ )  $\delta$  172.2, 157.2, 134.0, 129.8, 129.5, 122.9, 120.8, 120.1, 110.4, 72.7, 55.5, 52.0, 40.0. HPLC (Chiralpak IC-3 column, hexane/*i*-PrOH 90/10, 0.7 mL  $\text{min}^{-1}$ , 254 nm):  $t_1 = 22.8$  min,  $t_2 = 28.4$  min. HRMS Calculated for  $\text{C}_{13}\text{H}_{15}\text{ClO}_4$  (M+Na) 293.0557, found: 293.0553.

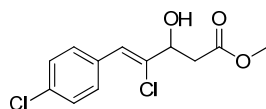

2h

**(Z)-Methyl 4-chloro-5-(4-chlorophenyl)-3-hydroxypent-4-enoate**

White solid.  $^1\text{H}$  NMR (400 MHz,  $\text{CDCl}_3$ )  $\delta$  7.59 – 7.54 (m, 2H), 7.35 – 7.31 (m, 2H), 6.87 (s, 1H), 4.78 – 4.72 (m, 1H), 3.75 (s, 3H), 3.31 (d,  $J = 5.0$  Hz, 1H), 2.93 – 2.72 (m, 3H).  $^{13}\text{C}$  NMR (100 MHz,  $\text{CDCl}_3$ )  $\delta$  172.4, 134.1, 134.0, 132.6, 130.7, 128.6, 124.1, 72.5, 52.2, 39.8. HPLC (Chiralpak IC-3 column, hexane/*i*-PrOH 95/5, 0.7 mL  $\text{min}^{-1}$ , 254 nm):  $t_1 = 16.6$  min,  $t_2 = 19.5$  min. HRMS Calculated for  $\text{C}_{12}\text{H}_{12}\text{Cl}_2\text{O}_3$  (M+Na) 297.0061, found: 297.0056.

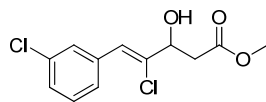

2i

**(Z)-Methyl 4-chloro-5-(3-chlorophenyl)-3-hydroxypent-4-enoate**

Pale yellow oil.  $^1\text{H}$  NMR (400 MHz,  $\text{CDCl}_3$ )  $\delta$  7.65 – 7.62 (m, 1H), 7.50 – 7.44 (m, 1H), 7.32 – 7.25 (m, 2H), 6.87 (d,  $J = 0.5$  Hz, 1H), 4.78 – 4.72 (m, 1H), 3.75 (s, 3H), 3.40 (d,  $J = 5.0$  Hz, 1H), 2.93 – 2.71 (m, 2H).  $^{13}\text{C}$  NMR (100 MHz,  $\text{CDCl}_3$ )  $\delta$  172.3, 135.8, 135.0, 134.2, 129.5, 129.1, 128.2, 127.5, 123.9, 72.4, 52.2, 39.8. HPLC (Chiralpak IC-3 column, hexane/*i*-PrOH 95/5, 0.5 mL  $\text{min}^{-1}$ , 254 nm):  $t_1 = 24.5$  min,  $t_2 = 27.6$  min. HRMS Calculated for  $\text{C}_{12}\text{H}_{12}\text{Cl}_2\text{O}_3$  (M+Na) 297.0061, found: 297.0070.

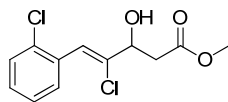

2j

**(Z)-Methyl 4-chloro-5-(2-chlorophenyl)-3-hydroxypent-4-enoate**

Pale yellow oil.  $^1\text{H}$  NMR (400 MHz,  $\text{CDCl}_3$ )  $\delta$  7.75 – 7.71 (m, 1H), 7.41 – 7.38 (m, 1H), 7.30 – 7.21 (m, 3H), 7.09 (s, 1H), 4.85 – 4.79 (m, 1H), 3.76 (s, 3H), 3.33 (d,  $J = 5.2$  Hz, 1H), 2.94 – 2.78 (m, 2H).  $^{13}\text{C}$  NMR (100 MHz,  $\text{CDCl}_3$ )  $\delta$  172.1, 136.3, 133.8, 132.6, 130.6, 129.4, 129.2, 126.4, 122.6, 72.2, 52.1, 39.8. HPLC (Chiralpak IC-3 column, hexane/*i*-PrOH 97/3, 0.7 mL min $^{-1}$ , 254 nm):  $t_1 = 28.5$  min,  $t_2 = 31.2$  min. HRMS Calculated for  $\text{C}_{12}\text{H}_{12}\text{Cl}_2\text{O}_3$  ( $\text{M}+\text{Na}$ ) 297.0061, found: 297.0045.

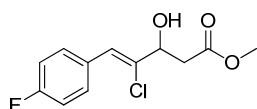

2k

**(Z)-Methyl 4-chloro-5-(4-fluorophenyl)-3-hydroxypent-4-enoate**

Pale yellow solid.  $^1\text{H}$  NMR (400 MHz,  $\text{CDCl}_3$ )  $\delta$  7.65 – 7.58 (m, 2H), 7.08 – 7.01 (m, 2H), 6.87 (s, 1H), 4.78 – 4.72 (m, 1H), 3.75 (s, 3H), 3.30 (d,  $J = 4.9$  Hz, 1H), 2.92 – 2.74 (m, 2H).  $^{13}\text{C}$  NMR (100 MHz,  $\text{CDCl}_3$ )  $\delta$  172.3, 162.3 (d,  $J = 248.7$  Hz), 133.3, 131.1 (d,  $J = 8.0$  Hz), 130.1 (d,  $J = 2.5$  Hz), 124.1, 115.3 (d,  $J = 21.5$  Hz), 72.5, 52.1, 39.8. HPLC (Chiralpak IC-3 column, hexane/*i*-PrOH 95/5, 0.7 mL min $^{-1}$ , 254 nm):  $t_1 = 17.2$  min,  $t_2 = 20.2$  min. HRMS Calculated for  $\text{C}_{12}\text{H}_{12}\text{ClFO}_3$  ( $\text{M}+\text{Na}$ ) 281.0357, found: 281.0359.

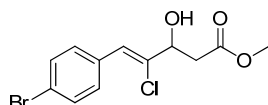

2l

**(Z)-Methyl 5-(4-bromophenyl)-4-chloro-3-hydroxypent-4-enoate**

White solid.  $^1\text{H}$  NMR (400 MHz,  $\text{CDCl}_3$ )  $\delta$  7.49 (s, 4H), 6.85 (d,  $J = 0.8$  Hz, 1H), 4.77 – 4.72 (m, 1H), 3.75 (s, 3H), 3.35 (d,  $J = 5.0$  Hz, 1H), 2.92 – 2.72 (m, 2H).  $^{13}\text{C}$  NMR (100 MHz,  $\text{CDCl}_3$ )  $\delta$  172.3, 134.3, 133.0, 131.5, 130.9, 124.2, 122.2, 72.5, 52.2, 39.7. HPLC (Chiralpak IC-3 column, hexane/*i*-PrOH 97/3, 0.7 mL min $^{-1}$ , 254 nm):  $t_1 = 25.4$  min,  $t_2 = 30.7$  min. HRMS Calculated for  $\text{C}_{12}\text{H}_{12}\text{BrClO}_3$  ( $\text{M}+\text{Na}$ ) 340.9556, found: 340.9554.

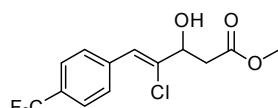

2m

**(Z)-Methyl 4-chloro-3-hydroxy-5-(4-(trifluoromethyl)phenyl)pent-4-enoate**

White solid.  $^1\text{H}$  NMR (400 MHz,  $\text{CDCl}_3$ )  $\delta$  7.72 (d,  $J = 8.4$  Hz, 2H), 7.62 (d,  $J = 8.4$  Hz, 2H), 6.97 (s, 1H), 4.80 – 4.74 (m, 1H), 3.76 (s, 3H), 3.40 (d,  $J = 5.0$  Hz, 1H), 2.96 – 2.73 (m, 3H).  $^{13}\text{C}$  NMR (100 MHz,  $\text{CDCl}_3$ )  $\delta$  172.3, 137.7, 136.0, 129.9 (q,  $J = 32.5$  Hz), 129.7, 125.2 (d,  $J = 3.3$  Hz), 124.1 (q,  $J = 272.0$  Hz), 123.9, 72.4, 52.1, 39.8. HPLC (Chiralpak IC-3 column, hexane/*i*-PrOH 97/3, 0.6 mL min $^{-1}$ , 254 nm):  $t_1 = 19.5$  min,  $t_2 = 23.0$  min. HRMS Calculated for  $\text{C}_{13}\text{H}_{12}\text{ClF}_3\text{O}_3$  ( $\text{M}+\text{Na}$ ) 331.0325, found: 331.0331.

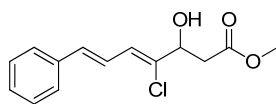

2n

**(4Z,6E)-Methyl 4-chloro-3-hydroxy-7-phenylhepta-4,6-dienoate**

Yellow solid.  $^1\text{H}$  NMR (400 MHz,  $\text{CDCl}_3$ )  $\delta$  7.48 – 7.43 (m, 2H), 7.37 – 7.31 (m, 2H), 7.29 – 7.24 (m, 1H), 7.09 (dd,  $J = 15.6, 10.4$  Hz, 1H), 6.71 (d,  $J = 15.6$  Hz, 1H), 6.65 (d,  $J = 10.4$  Hz, 1H), 4.76 – 4.70 (m, 1H), 3.74 (s, 3H), 3.22 (br, 1H), 2.86 – 2.72 (m, 2H). The *Z*-geometry of C4-C5 double bond was confirmed by 1D-NOE.  $^{13}\text{C}$  NMR (100 MHz,  $\text{CDCl}_3$ )  $\delta$  172.3, 136.8, 136.2, 134.5, 128.8, 128.4, 126.9, 125.9, 123.0, 71.7, 52.1, 39.7. HPLC (Chiralpak IC-3 column, hexane/*i*-PrOH 95/5, 0.7 mL min $^{-1}$ , 254 nm):  $t_1 = 23.6$  min,  $t_2 = 27.7$  min. HRMS Calculated for  $\text{C}_{14}\text{H}_{15}\text{ClO}_3$  ( $\text{M}+\text{Na}$ ) 289.0607, found: 289.0617.

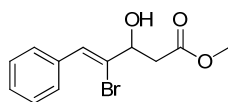

**4a** (Z)-Methyl 4-bromo-3-hydroxy-5-phenylpent-4-enoate

Pale yellow oil.  $^1\text{H}$  NMR (400 MHz,  $\text{CDCl}_3$ )  $\delta$  7.63 – 7.58 (m, 2H), 7.40 – 7.29 (m, 3H), 7.20 (s, 1H), 4.81 – 4.75 (m, 1H), 3.75 (s, 3H), 3.25 (d,  $J = 5.1$  Hz, 1H), 2.92 – 2.77 (m, 2H). The *Z*-olefin was confirmed by 1D-NOE.  $^{13}\text{C}$  NMR (100 MHz,  $\text{CDCl}_3$ )  $\delta$  172.2, 134.9, 129.2, 128.6, 128.3, 128.2, 127.0, 73.8, 52.2, 40.6. HPLC (Chiralpak IC-3 column, hexane/*i*-PrOH 95/5, 0.6 mL min $^{-1}$ , 254 nm):  $t_1 = 25.9$  min,  $t_2 = 31.7$  min. HRMS Calculated for  $\text{C}_{12}\text{H}_{13}\text{BrO}_3$  ( $\text{M}+\text{Na}$ ) 306.9946, found: 306.9936.

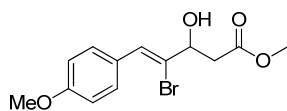

**4b** (Z)-Methyl 4-bromo-3-hydroxy-5-(4-methoxyphenyl)pent-4-enoate

Racemate: white solid. Enantio-rich form: yellow oil.  $^1\text{H}$  NMR (400 MHz,  $\text{CDCl}_3$ )  $\delta$  7.64 – 7.58 (m, 2H), 7.11 (s, 1H), 6.92 – 6.87 (m, 2H), 4.78 – 4.72 (m, 1H), 3.82 (s, 3H), 3.74 (s, 3H), 3.19 (d,  $J = 5.0$  Hz, 1H), 2.90 – 2.76 (m, 2H).  $^{13}\text{C}$  NMR (100 MHz,  $\text{CDCl}_3$ )  $\delta$  172.2, 159.5, 130.7, 128.0, 127.2, 125.0, 113.6, 73.9, 55.3, 52.1, 40.6. HPLC (Chiralpak IC-3 column, hexane/*i*-PrOH 90/10, 0.9 mL min $^{-1}$ , 254 nm):  $t_1 = 18.4$  min,  $t_2 = 22.9$  min. HRMS Calculated for  $\text{C}_{13}\text{H}_{15}\text{BrO}_4$  ( $\text{M}+\text{Na}$ ) 337.0051, found: 337.0075.

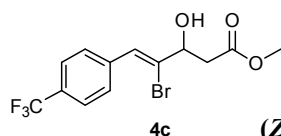

**4c** (Z)-Methyl 4-bromo-3-hydroxy-5-(4-(trifluoromethyl)phenyl)pent-4-enoate

White solid.  $^1\text{H}$  NMR (400 MHz,  $\text{CDCl}_3$ )  $\delta$  7.69 (d,  $J = 8.3$  Hz, 2H), 7.62 (d,  $J = 8.3$  Hz, 2H), 4.82 – 4.76 (m, 1H), 3.76 (s, 3H), 3.40 (d,  $J = 5.0$  Hz, 1H), 2.97 – 2.75 (m, 3H).  $^{13}\text{C}$  NMR (100 MHz,  $\text{CDCl}_3$ )  $\delta$  172.3, 138.6, 130.0 (q,  $J = 32.5$  Hz), 129.4, 129.3, 127.2, 125.2 (d,  $J = 3.4$  Hz), 124.1 (q,  $J = 272.0$  Hz), 73.6, 52.2, 40.3. HPLC (Chiralpak IC-3 column, hexane/*i*-PrOH 95/5, 0.6 mL min $^{-1}$ , 254 nm):  $t_1 = 15.4$  min,  $t_2 = 18.6$  min. HRMS Calculated for  $\text{C}_{13}\text{H}_{12}\text{BrF}_3\text{O}_3$  ( $\text{M}+\text{Na}$ ) 374.9820, found: 374.9815.

## 5. Typical procedure for the racemates of 2a-n and 4a-c

To a solution of **1c** (200.5 mg, 0.840 mmol, 1.0 eq.) and  $\text{CeCl}_3 \cdot 7\text{H}_2\text{O}$  (313.1 mg, 0.840 mmol, 1.0 eq.) in MeOH (3 mL),  $\text{NaBH}_4$  (35.0 mg, 0.924 mmol, 1.1 eq.) was added in several portions, then the reaction mixture was stirred for 10 min, quenched by saturated  $\text{NH}_4\text{Cl}$  solution. Most solvent was rotavapored off, the residual was extracted with EtOAc (10 mL $\times$ 2), dried over  $\text{Na}_2\text{SO}_4$ . Concentrated

and then purified by flash chromatography (Hexanes/EtOAc = 5/1) to give 182.3 mg pale yellow oil.  
Yield: 90%.

## 6. Typical procedure for debromination of 4a-c and spectra data of 4a'-c'

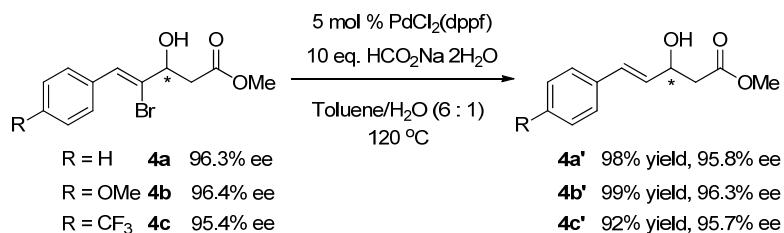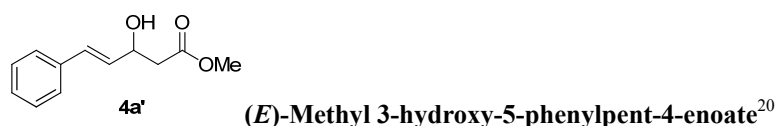

To a 10 mL Schlenk tube were added PdCl<sub>2</sub>(dppf)·CH<sub>2</sub>Cl<sub>2</sub> (5.6 mg, 6.91 μmol, 5 mol %) and **4a** (39.4 mg, 0.14 mmol, 96.3% ee) under nitrogen, toluene (3 mL) was added, and then an aqueous solution (0.5 mL) of HCO<sub>2</sub>Na·2H<sub>2</sub>O (144.0 mg, 1.38 mmol, 10 eq.) was added. The mixture was stirred for 5 min at room temperature before it was heated at 120 °C for 2 h. The color changed to dark, TLC showed **4a** was consumed completely. EtOAc (5 mL) and water (2 mL) were added to the cold reaction mixture, after layers separation, the aqueous layer was extracted with EtOAc (5 mL) again. Combined organic layer was rotavapored to dryness, the residual was purified by flash chromatography (Hexanes/EtOAc = 5/1) to give 27.9 mg pale yellow oil. Yield: 98%. <sup>1</sup>H NMR (400 MHz, CDCl<sub>3</sub>) δ 7.40 – 7.36 (m, 2H), 7.35 – 7.29 (m, 2H), 7.27 – 7.22 (m, 1H), 6.66 (dd, *J* = 15.9, 1.1 Hz, 1H), 6.23 (dd, *J* = 15.9, 6.1 Hz, 1H), 4.77 – 4.70 (m, 1H), 3.74 (s, 3H), 3.00 (brs, 1H), 2.72 – 2.59 (m, 2H). <sup>13</sup>C NMR (100 MHz, CDCl<sub>3</sub>) δ 172.5, 136.3, 130.6, 130.0, 128.5, 127.7, 126.5, 68.8, 51.8, 41.4. HPLC (Chiralpak IC-3 column, hexane/*i*-PrOH 90/10, 0.9 mL min<sup>-1</sup>, 254 nm): *t*<sub>1</sub> = 19.1 min, *t*<sub>2</sub> = 22.0 min. 95.8% ee.

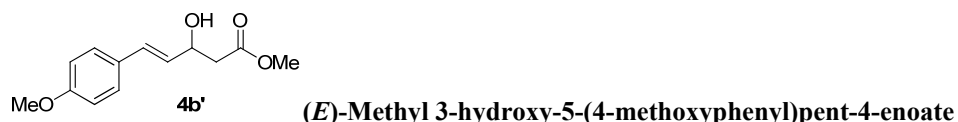

Yield: 99%. Pale yellow solid. <sup>1</sup>H NMR (400 MHz, CDCl<sub>3</sub>) δ 7.34 – 7.29 (m, 2H), 6.88 – 6.83 (m, 2H), 6.60 (d, *J* = 15.9 Hz, 1H), 6.08 (dd, *J* = 15.9, 6.4 Hz, 1H), 4.75 – 4.67 (m, 1H), 3.81 (s, 3H), 3.73 (s, 3H), 2.94 (d, *J* = 4.1 Hz, 1H), 2.71 – 2.58 (m, 2H). <sup>13</sup>C NMR (100 MHz, CDCl<sub>3</sub>) δ 172.8, 159.4, 130.5, 129.2, 127.8, 127.7, 114.1, 69.2, 55.4, 52.0, 41.6. HPLC (Chiralpak IC-3 column, hexane/*i*-PrOH 90/10, 1.0 mL min<sup>-1</sup>, 254 nm): *t*<sub>1</sub> = 33.1 min, *t*<sub>2</sub> = 38.2 min. 96.3% ee. HRMS Calculated for C<sub>13</sub>H<sub>16</sub>O<sub>4</sub> (M+Na) 259.0946, found: 259.0951.

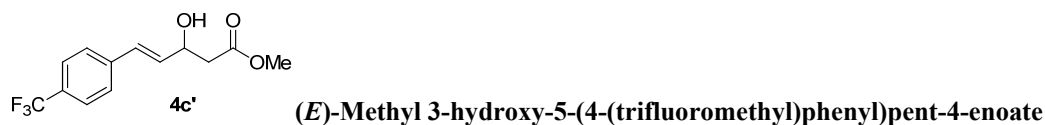

Yield: 92%. Yellow solid. <sup>1</sup>H NMR (400 MHz, CDCl<sub>3</sub>) δ 7.55 (d, *J* = 8.2 Hz, 2H), 7.45 (d, *J* = 8.2 Hz, 2H), 6.70 (d, *J* = 15.9 Hz, 1H), 6.31 (dd, *J* = 15.9, 5.7 Hz, 1H), 4.79 – 4.71 (m, 1H), 3.73 (s, 3H), 3.30 (brs, 1H), 2.73 – 2.57 (m, 2H). <sup>13</sup>C NMR (100 MHz, CDCl<sub>3</sub>) δ 172.7, 140.0, 132.6, 129.6 (q, *J* = 32.5

Hz), 129.4, 126.8, 125.6 (d,  $J = 3.5$  Hz), 124.2 (q,  $J = 271.7$  Hz), 68.6, 52.1, 41.2. HPLC (Chiralpak IC-3 column, hexane/*i*-PrOH 95/5, 0.8 mL min<sup>-1</sup>, 254 nm):  $t_1 = 20.7$  min,  $t_2 = 23.4$  min. 95.7% ee. HRMS Calculated for C<sub>13</sub>H<sub>13</sub>F<sub>3</sub>O<sub>3</sub> (M+Na) 297.0714, found: 297.0728.

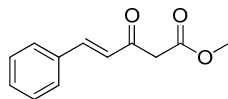

10

(*E*)-Methyl 3-oxo-5-phenylpent-4-enoate<sup>21</sup>

Same procedure with **1**, 60% yield from cinnamic acid. <sup>1</sup>H NMR (400 MHz, CDCl<sub>3</sub>) δ 11.90 (d,  $J = 1.4$  Hz, 0.4H)(enol), 7.63 – 7.54 (m, 2H), 7.52 – 7.46 (m, 1H), 7.43 – 7.30 (m, 3H), 6.81 (d,  $J = 16.1$  Hz, 0.7H)(ketone), 6.45 (dd,  $J = 15.9, 1.4$  Hz, 0.5H)(enol), 5.18 (s, 0.4H)(enol), 3.78 (s, 1.2H)(enol), 3.77 (s, 1.8H)(ketone), 3.72 (s, 1.4H)(ketone). <sup>13</sup>C NMR (100 MHz, CDCl<sub>3</sub>) δ 192.2, 173.2, 169.3, 167.5, 144.8, 137.0, 135.3, 134.1, 131.0, 129.4, 129.0, 128.9, 128.6, 127.6, 125.2, 121.8, 91.7, 52.5, 51.4, 47.3.

## References

- (1) D. K. Barma, A. Kundu, H. Zhang, C. Mioskowski, J. R. Falck, *J. Am. Chem. Soc.*, 2003, **125**, 3218.
- (2) U. Karama, *J. Chem. Res., Synop.*, 2009, 405.
- (3) J. R. Falck, R. Bejot, D. K. Barma, A. Bandyopadhyay, S. Joseph, C. Mioskowski, *J. Org. Chem.*, 2006, **71**, 8178.
- (4) H. Yonemura, H. Nishino, K. Kurosawa, *Bull. Chem. Soc. Jpn.*, 1987, **60**, 809.
- (5) B. Jiang, Y. Dou, X. Xu, M. Xu, *Org. Lett.*, 2008, **10**, 593.
- (6) P. Plath, K. Eicken, N. Goetz, J. Wild, N. Meyer, B. Wuerzer, *US Pat.*, 5062884 A1, 1991, CAN 107:198078.
- (7) E. Brenna, F. G. Gatti, A. Manfredi, D. Monti, F. Parmeggiani, *Eur. J. Org. Chem.*, 2011, 4015.
- (8) J. M. Concellón, M. Huerta, *J. Org. Chem.*, 2005, **70**, 4714.
- (9) J. J. Sudborough, T. C. James, *J. Chem. Soc., Trans.*, 1906, **89**, 105.
- (10) Y. Amino, K. Kawada, K. Toi, I. Kumashiro, K. Fukushima, *Chem. Pharm. Bull.*, 1988, **36**, 4426.
- (11) P. Savignaca, M. Snoussia, P. Coutrot, *Synth. Commun.*, 1978, **8**, 19.
- (12) S. Wang, W. Liu, Y. Hua, *Beijing Yike Daxue Xuebao*, 1990, **22**, 63.
- (13) S. Wang, G. Hu, W. Liu, Y. Wang, S. Shi, *Youji Huaxue*, 1988, **8**, 241.
- (14) C. Xia, H. Li, F. Liu, W. Hu, *Bioorg. Med. Chem. Lett.*, 2008, **18**, 6553.
- (15) H. McNab, R. G. Tyas, *J. Org. Chem.*, 2007, **72**, 8760.
- (16) E. N. Jacobsen, L. Deng, Y. Furukawa, L. E. Martinez, *Tetrahedron*, 1994, **50**, 4323.
- (17) J. Klein, S. Zitrin, *J. Org. Chem.*, 1970, **35**, 666.
- (18) I. Nowak, M. J. Robins, *J. Org. Chem.*, 2007, **72**, 2678.
- (19) W. Dai, J. Wu, K. C. Fong, M. Y. H. Lee, C. W. Lau, *J. Org. Chem.*, 1999, **64**, 5062.
- (20) S. E. Denmark, T. Wynn, G. L. Beutner, *J. Am. Chem. Soc.*, 2002, **124**, 13405.
- (21) J. Shet, V. Desai, S. Tilve, *Synthesis*, 2004, **11**, 1859.

### Copy of $^1\text{H}$ & $^{13}\text{C}$ NMR of 1-4 and 5e, 5g, 5j, 6d, 6i, 6k, 7c, 8c

#### (Z)-Ethyl 4-chloro-3-oxo-5-phenylpent-4-enoate (1a)

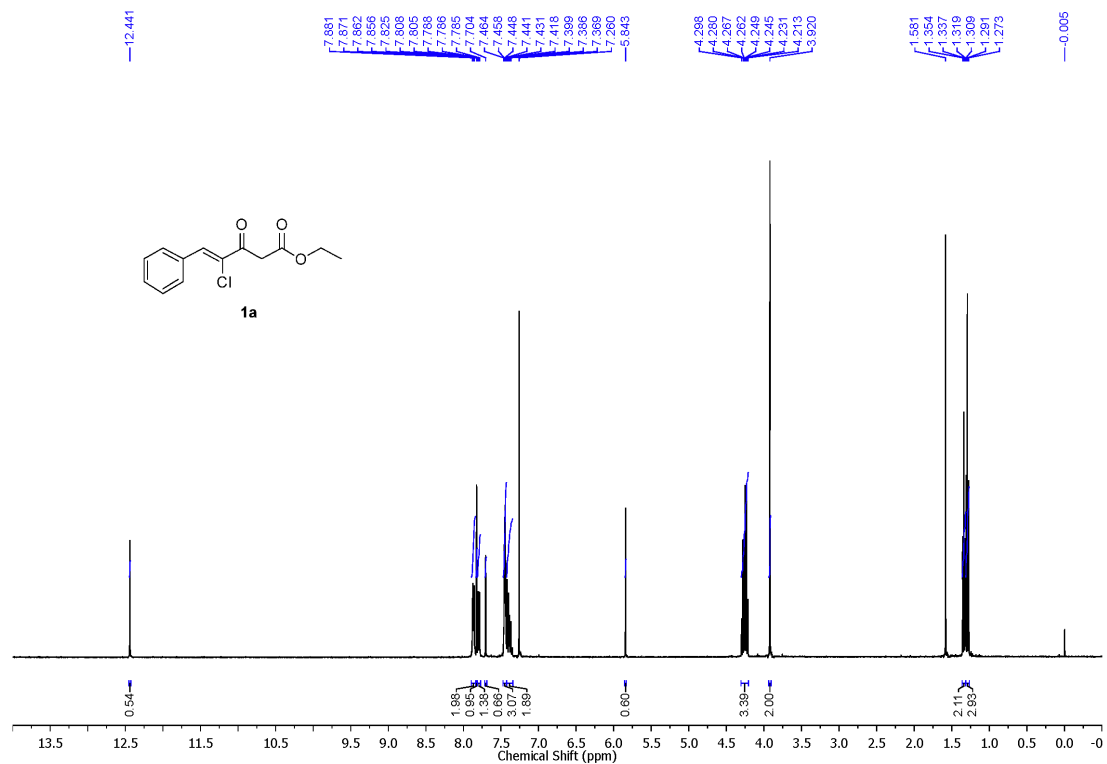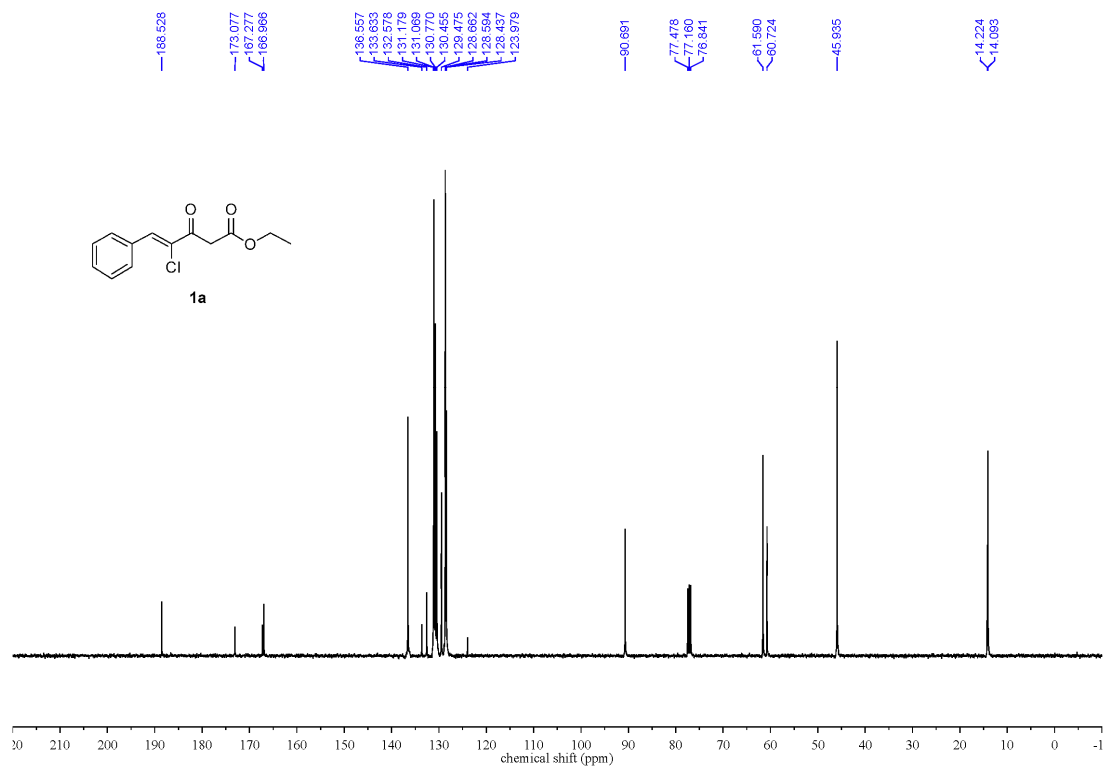

**(Z)-Propyl 4-chloro-3-oxo-5-phenylpent-4-enoate (1b)**

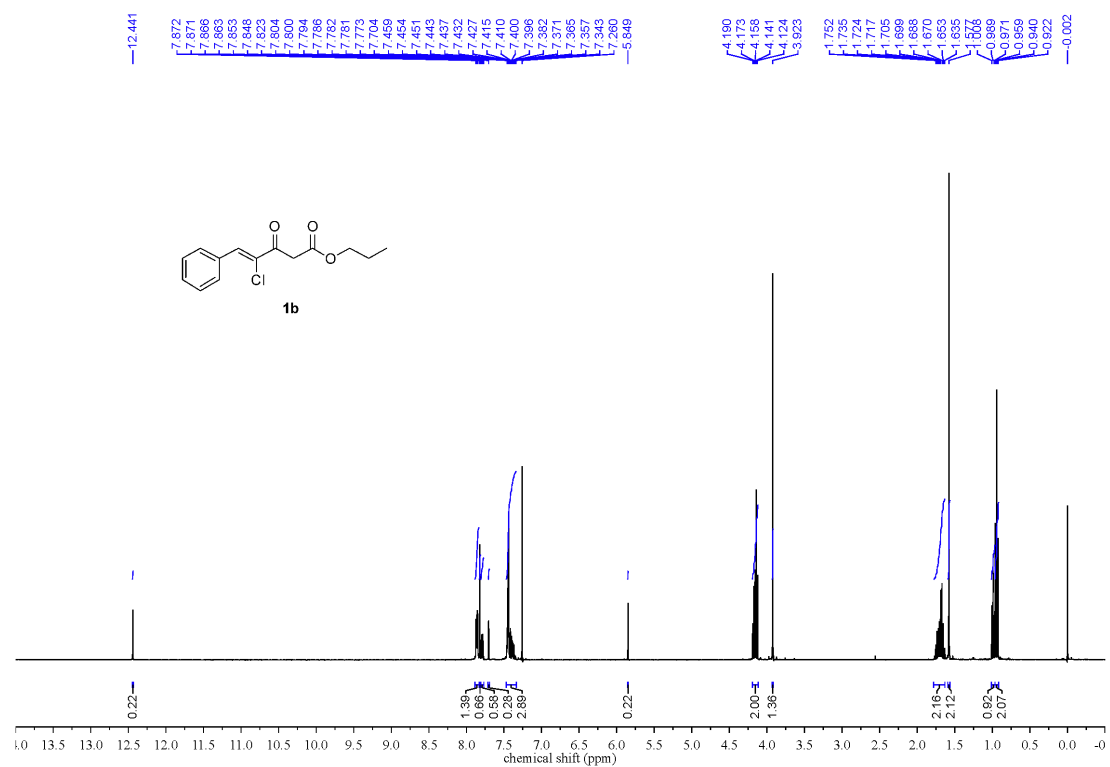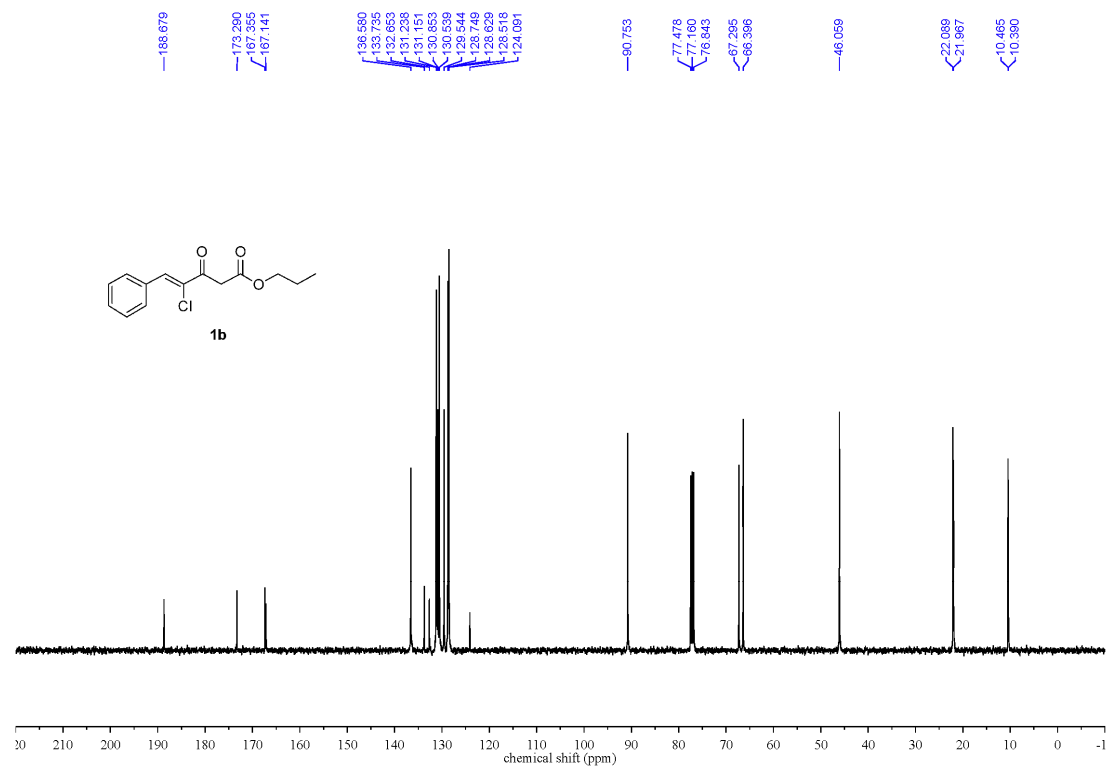



**(Z)-Methyl 4-chloro-3-oxo-5-phenylpent-4-enoate (1c)**

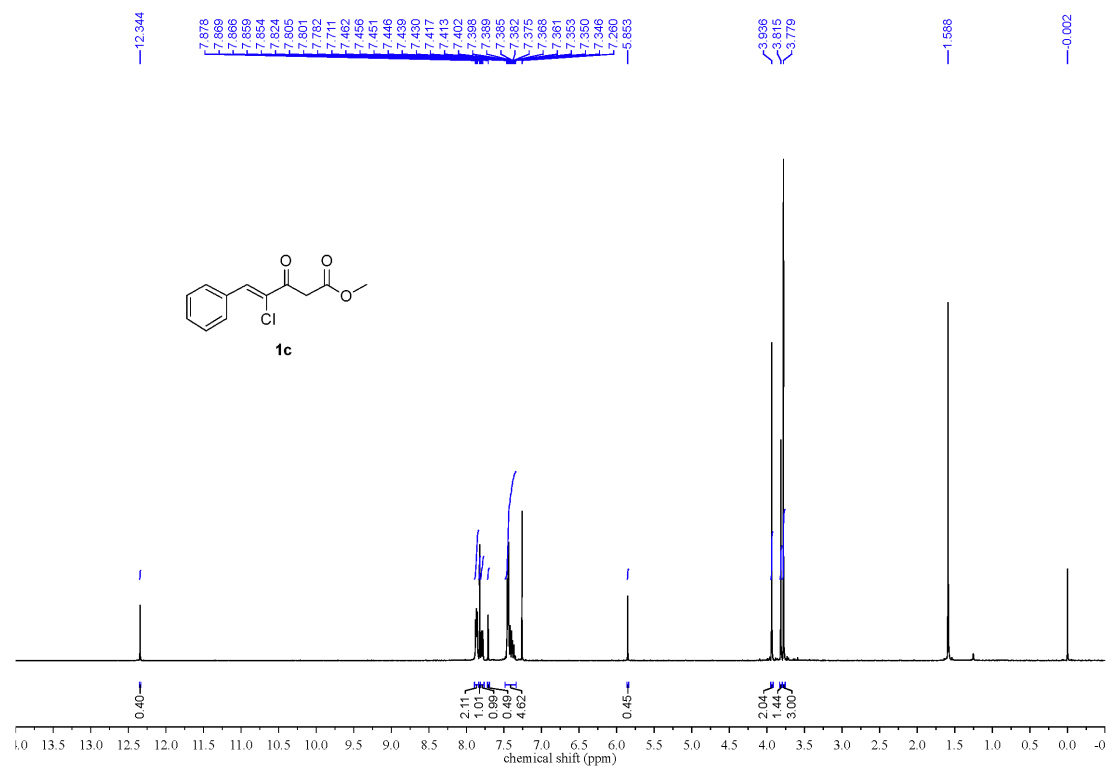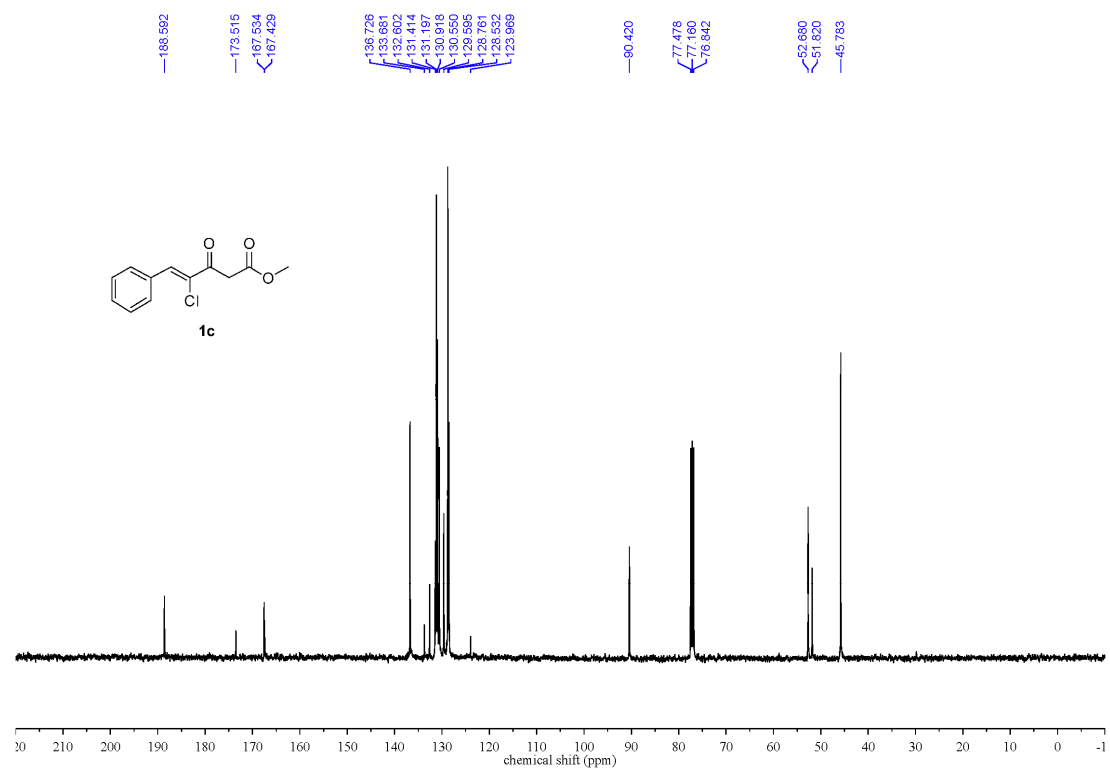

**(Z)-Methyl 4-chloro-3-oxo-5-(p-tolyl)pent-4-enoate (1d)**

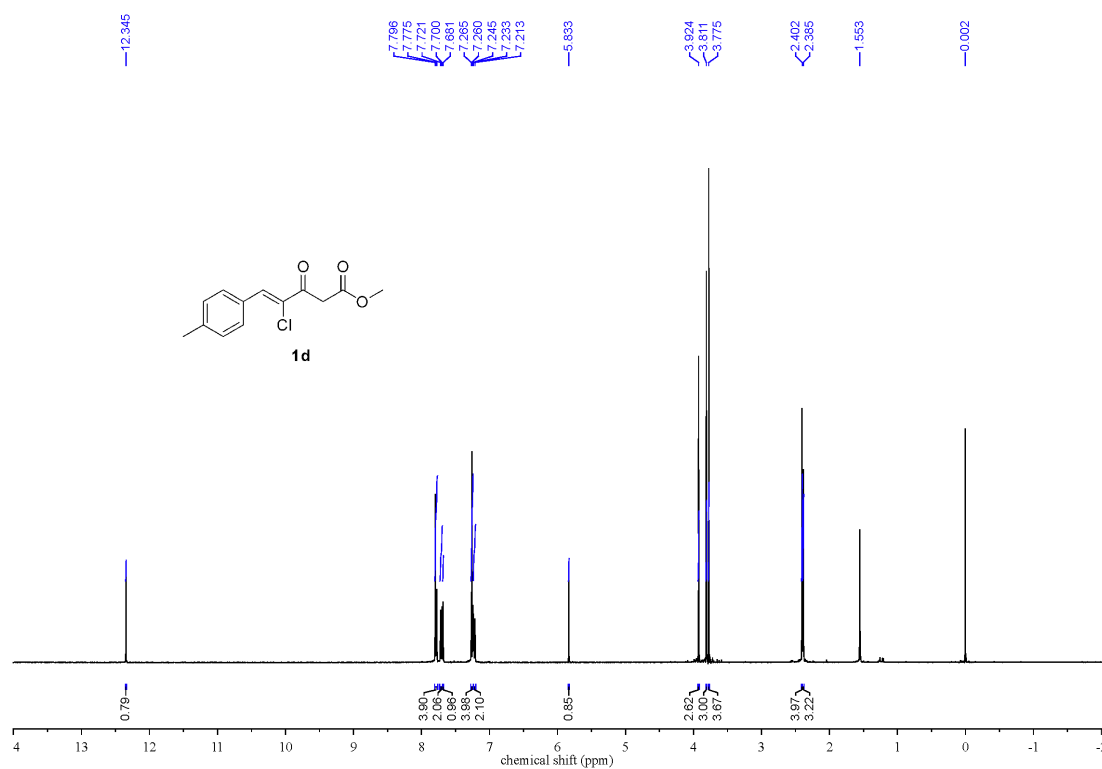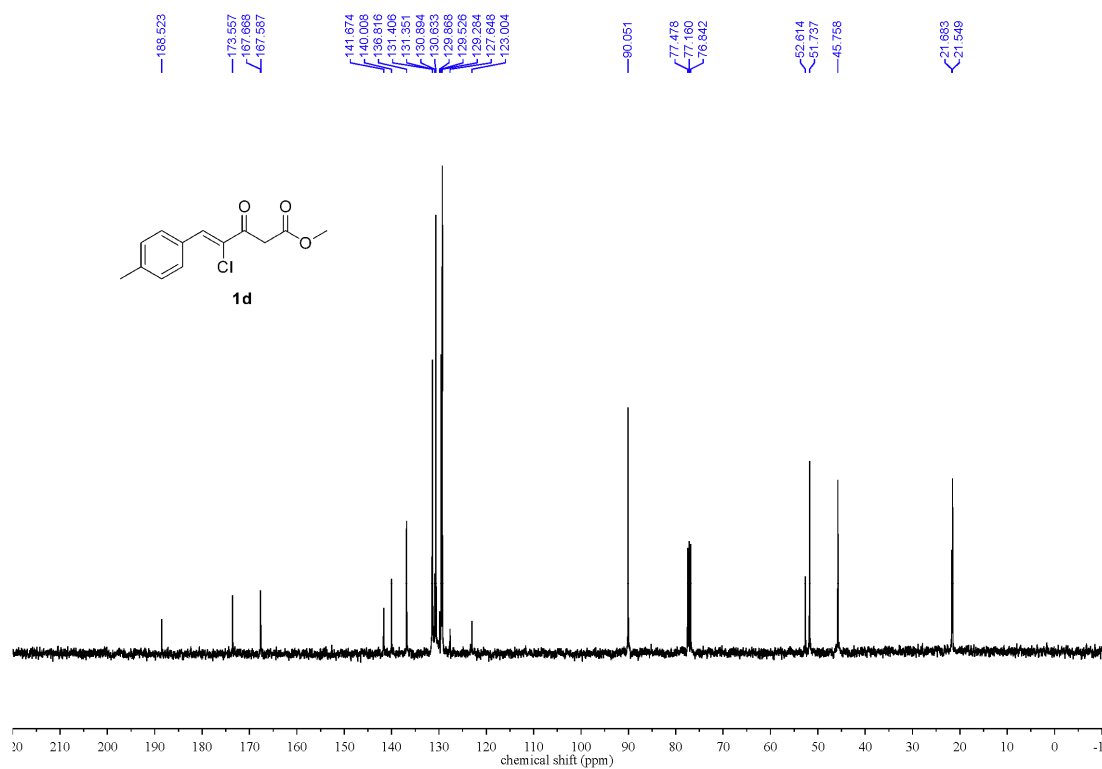

**(Z)-Methyl 4-chloro-5-(4-methoxyphenyl)-3-oxopent-4-enoate (1e)**

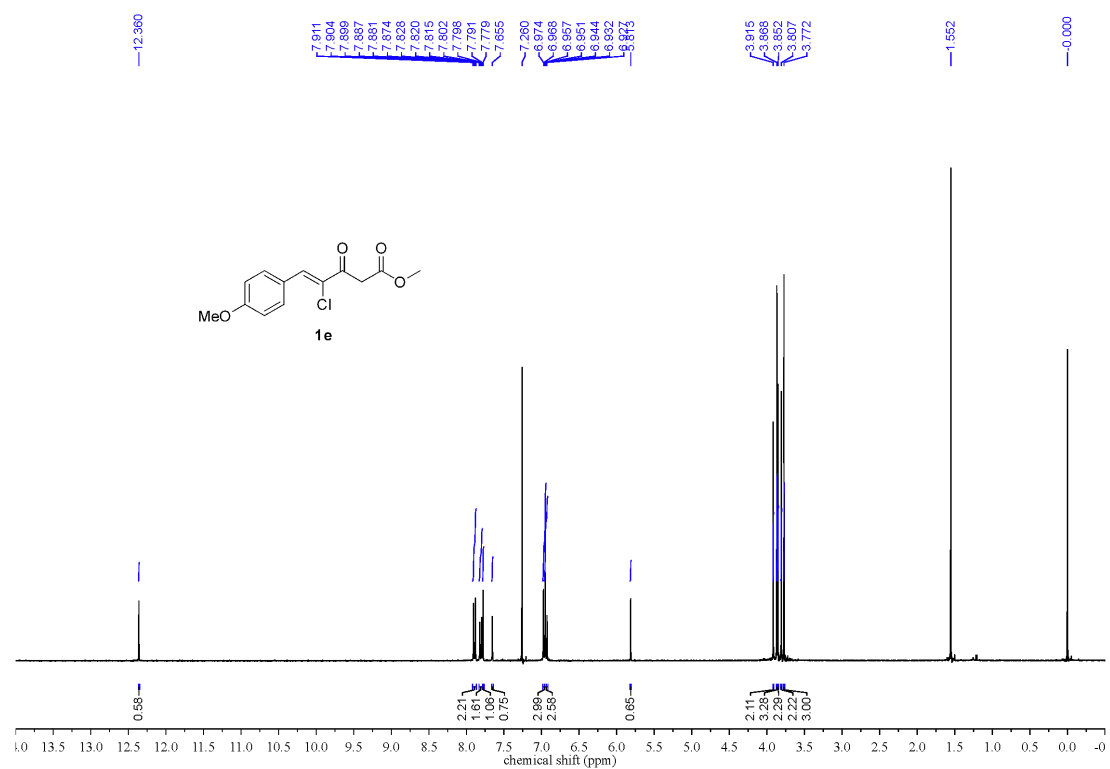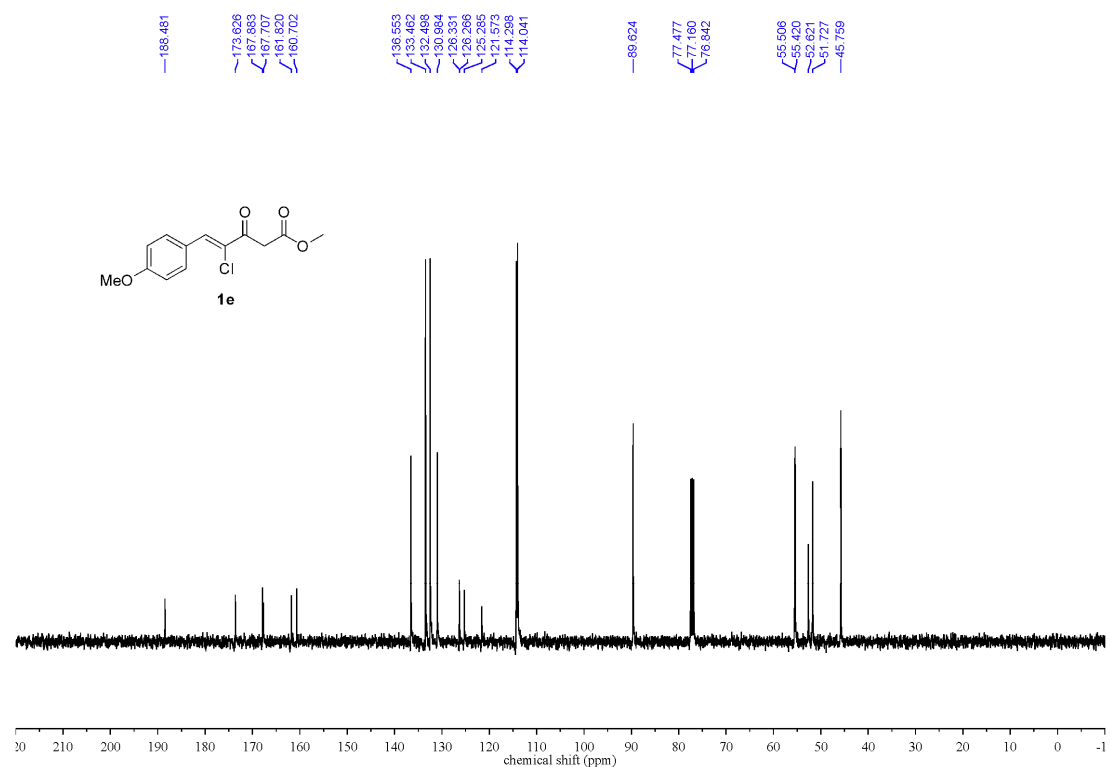

**(Z)-Methyl 4-chloro-5-(3-methoxyphenyl)-3-oxopent-4-enoate (1f)**

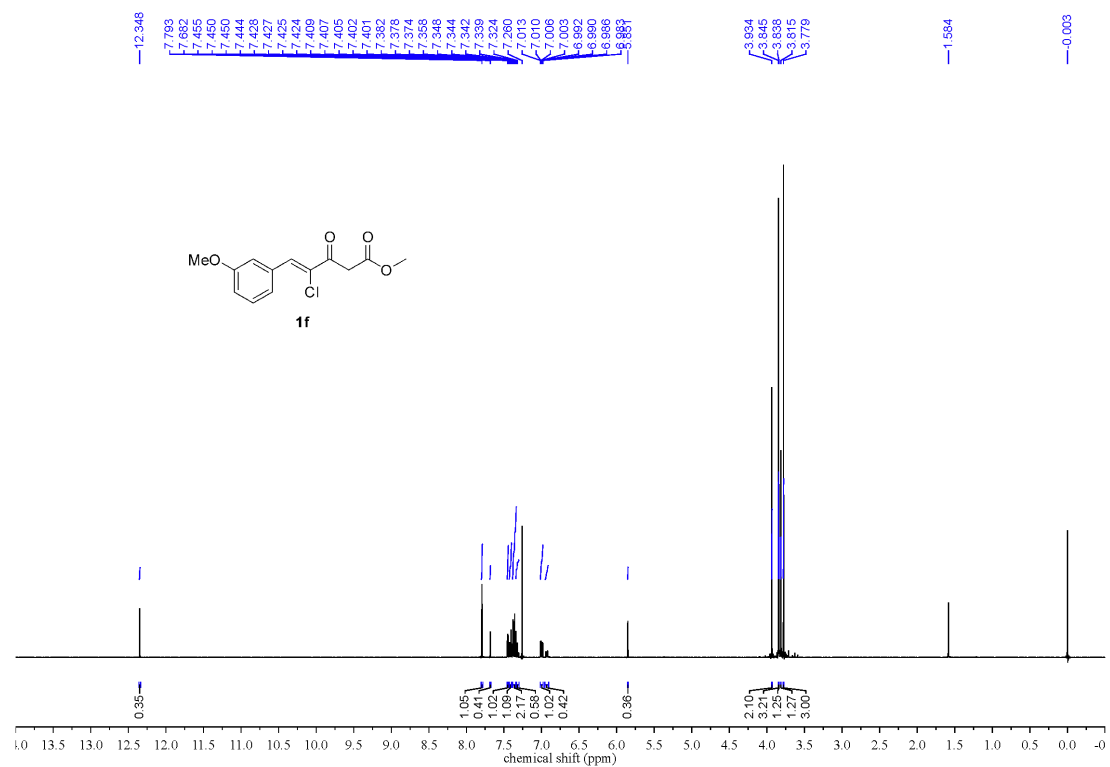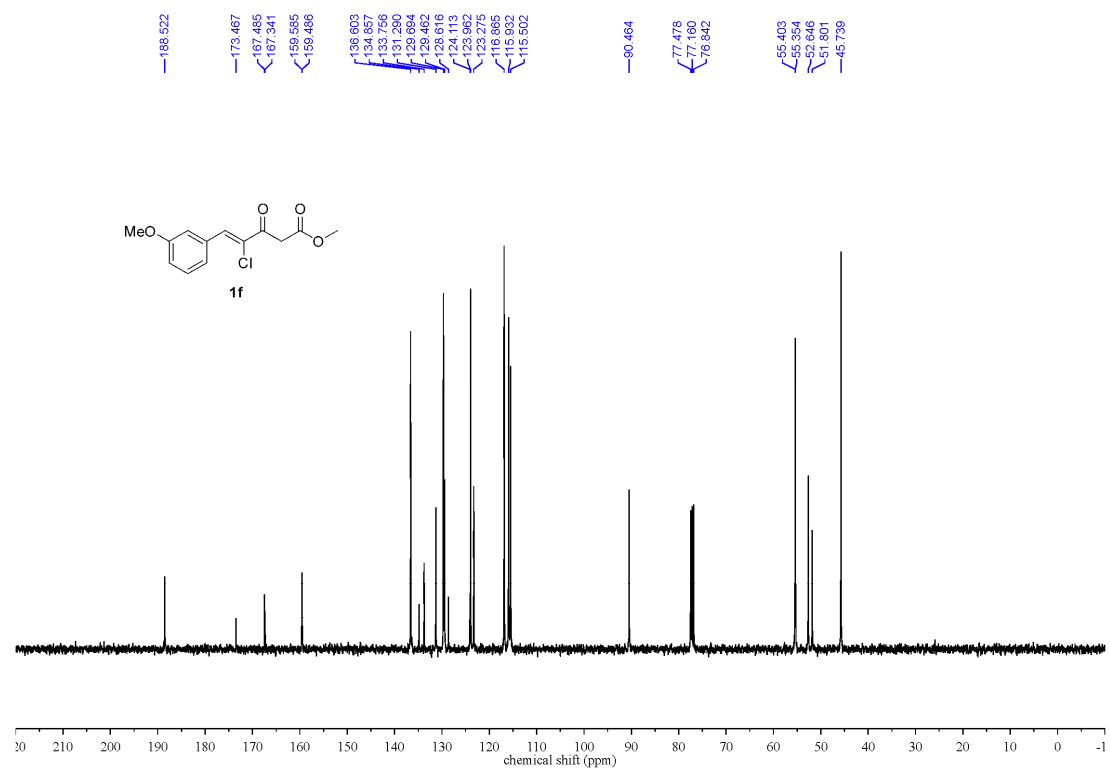

**(Z)-Methyl 4-chloro-5-(2-methoxyphenyl)-3-oxopent-4-enoate (1g)**

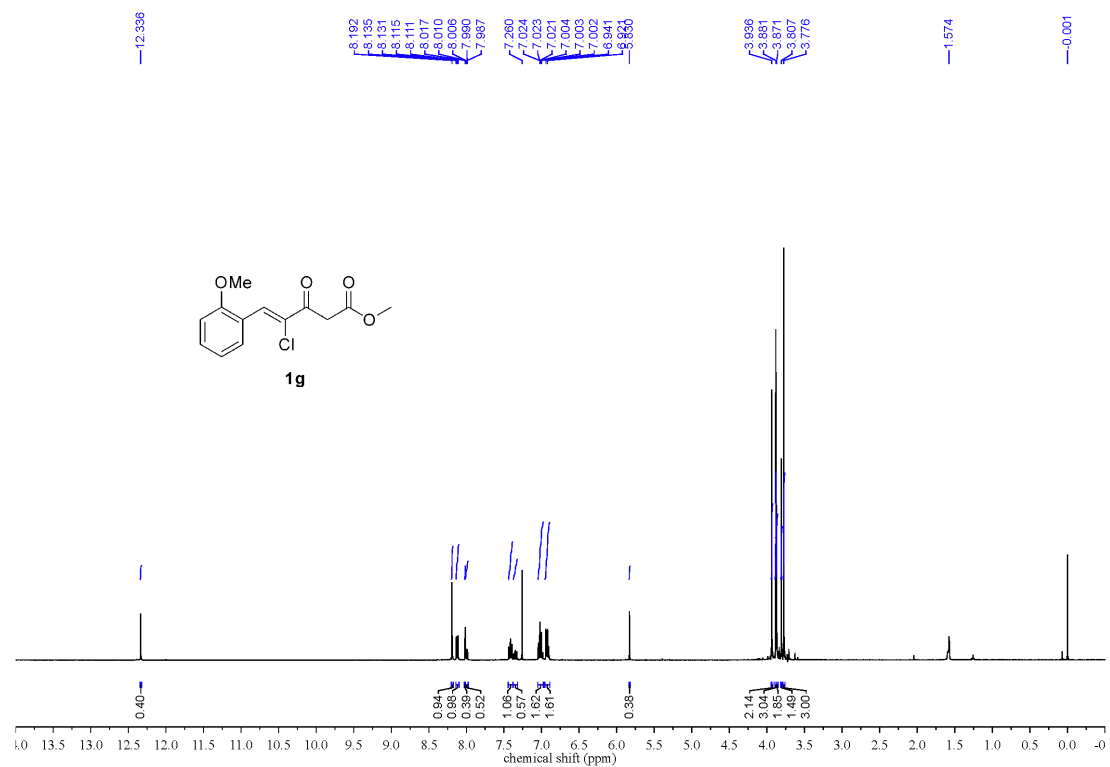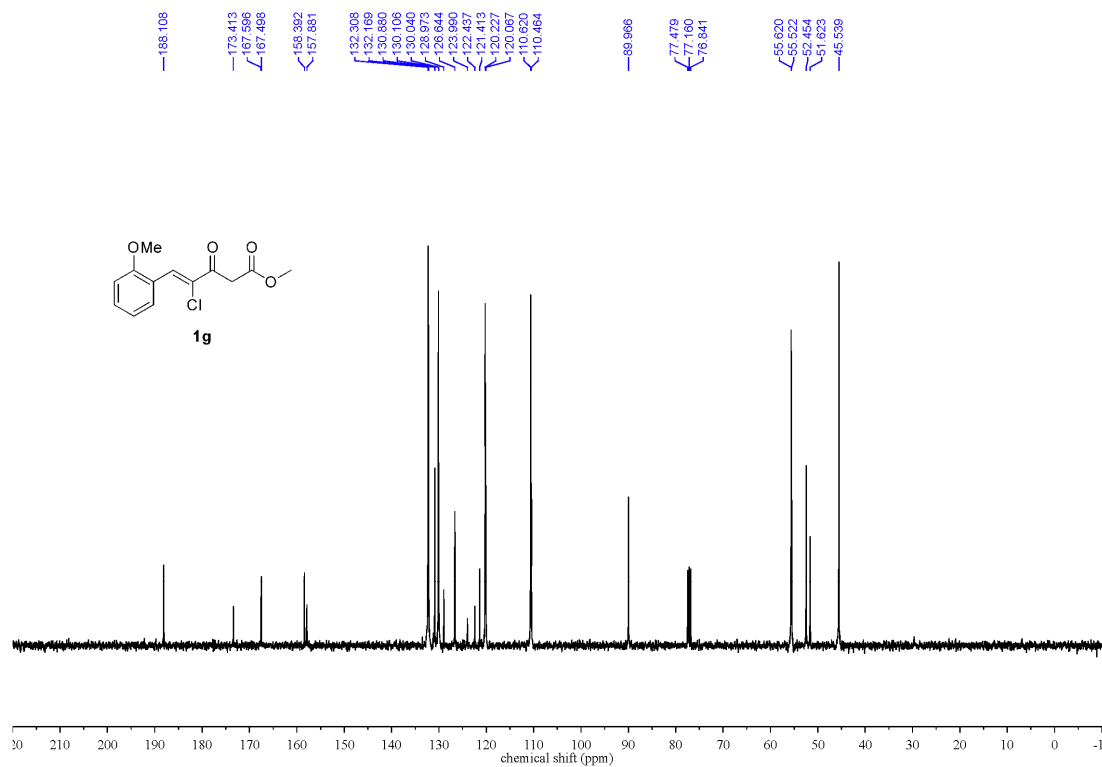

**(Z)-Methyl 4-chloro-5-(4-chlorophenyl)-3-oxopent-4-enoate (1h)**

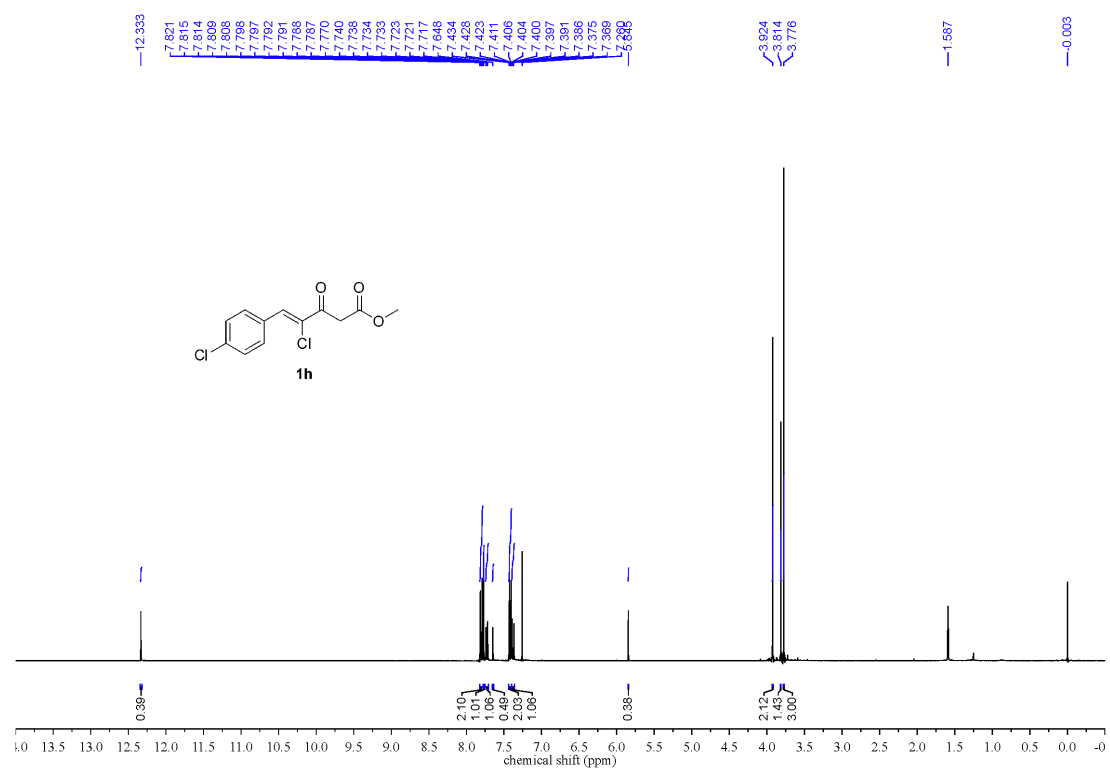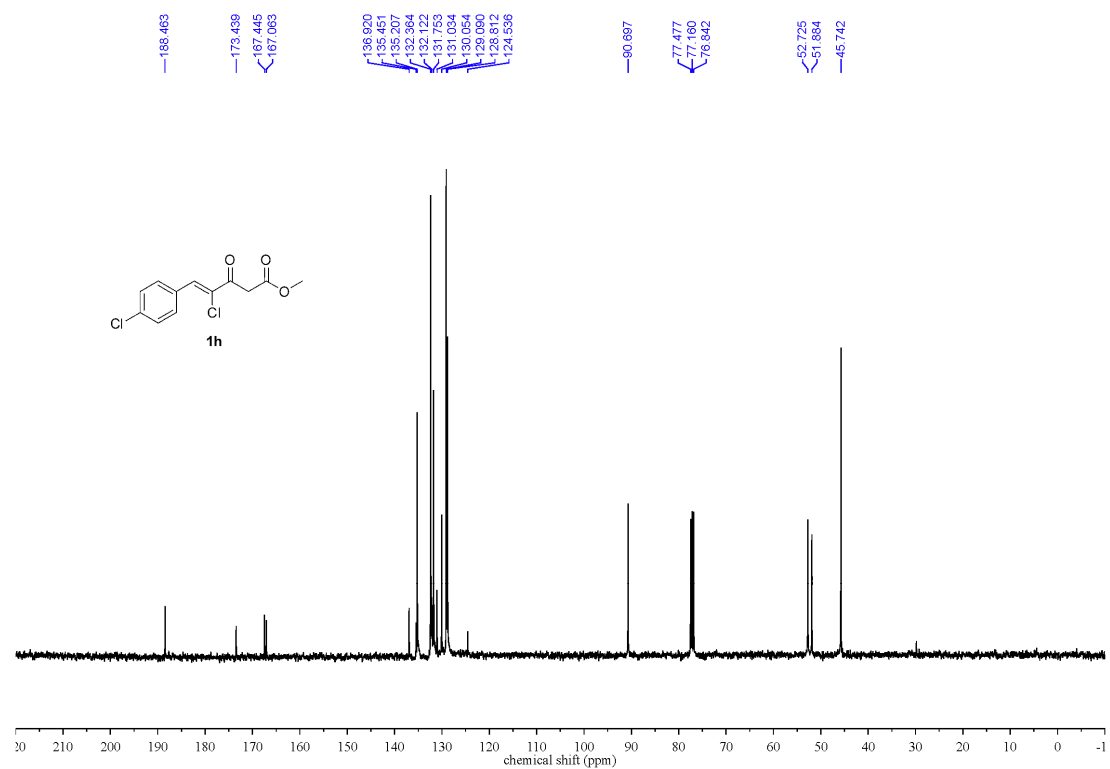

**(Z)-Methyl 4-chloro-5-(3-chlorophenyl)-3-oxopent-4-enoate (1i)**

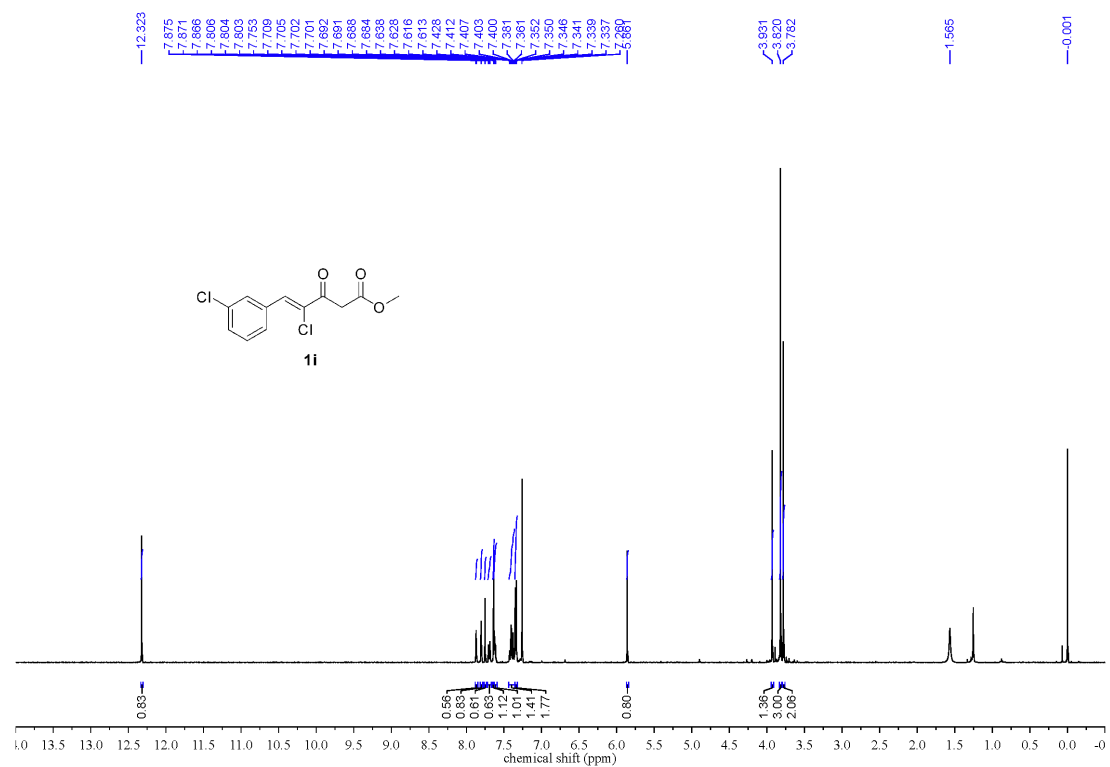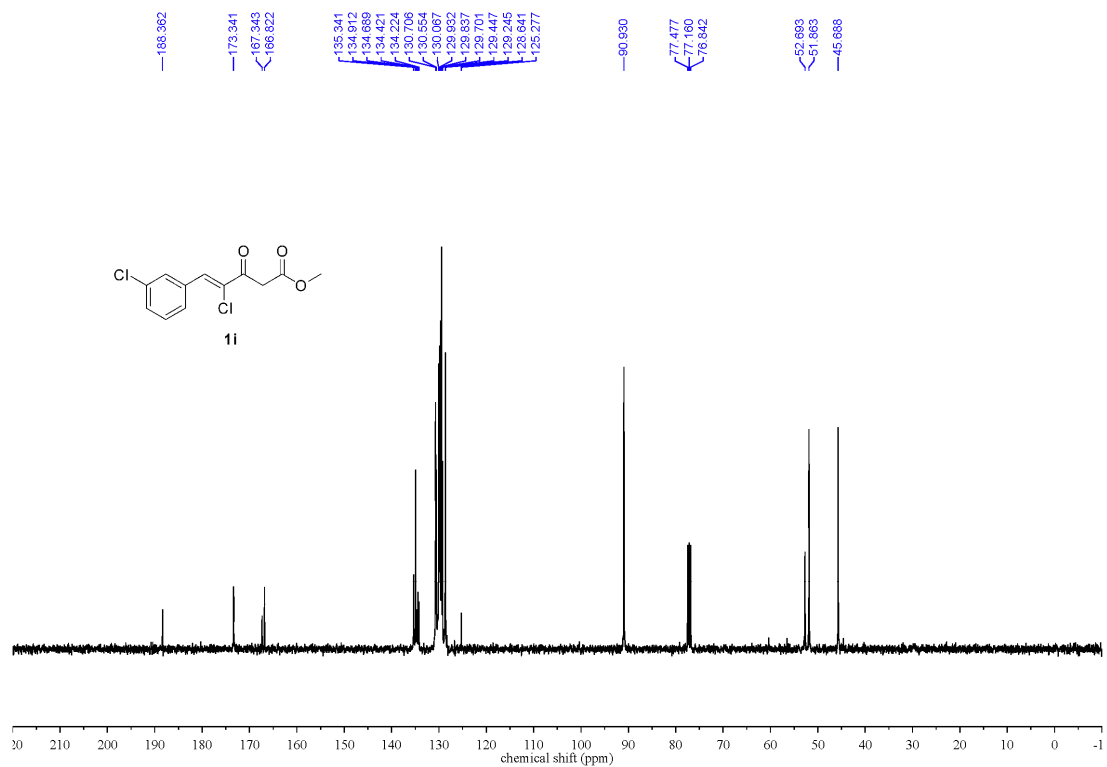

**(Z)-Methyl 4-chloro-5-(2-chlorophenyl)-3-oxopent-4-enoate (1j)**

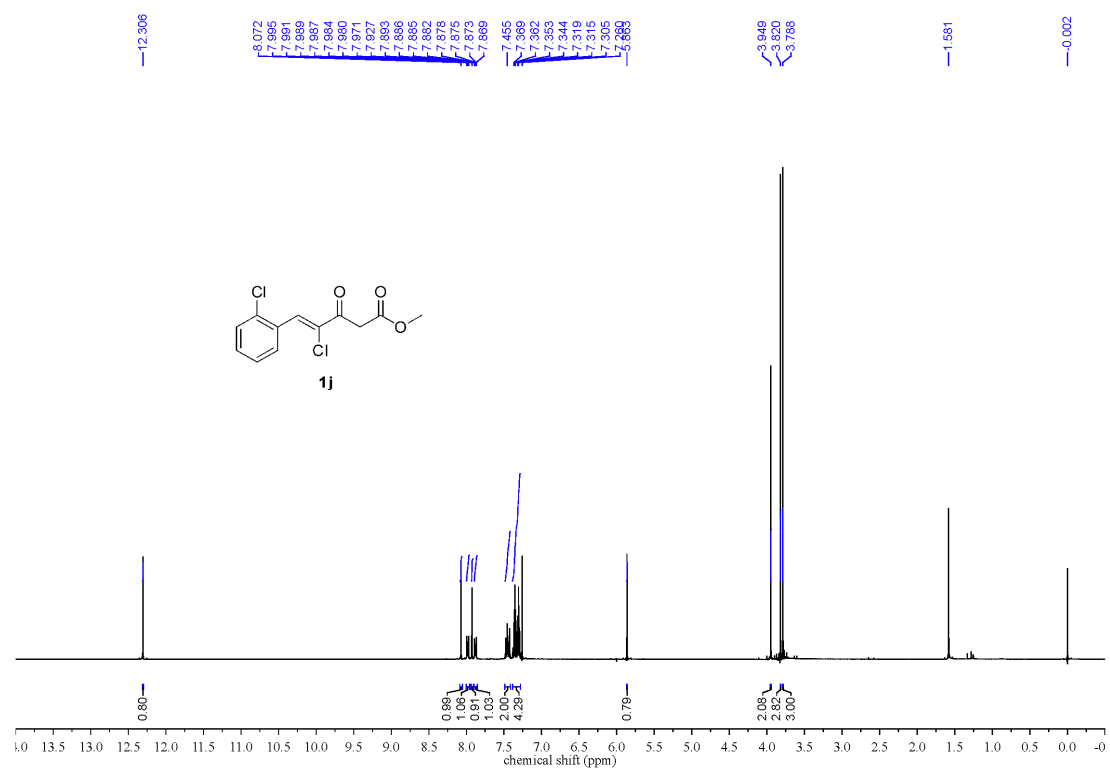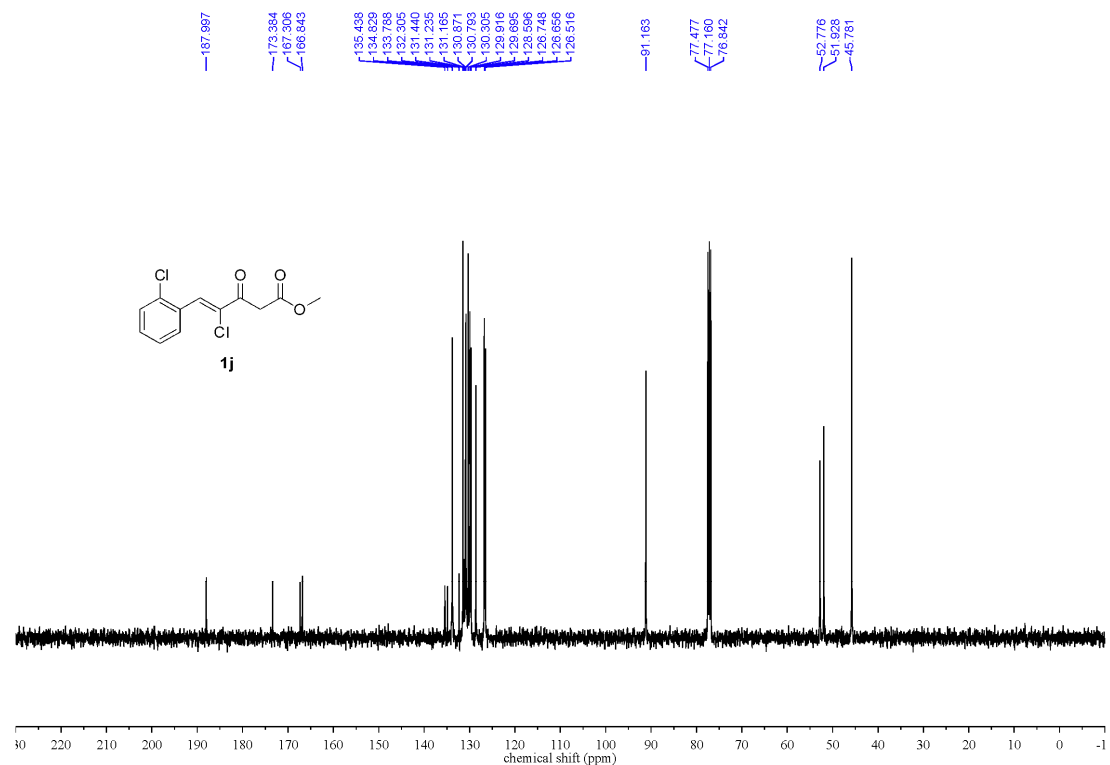



**(Z)-Methyl 4-chloro-5-(4-fluorophenyl)-3-oxopent-4-enoate (1k)**

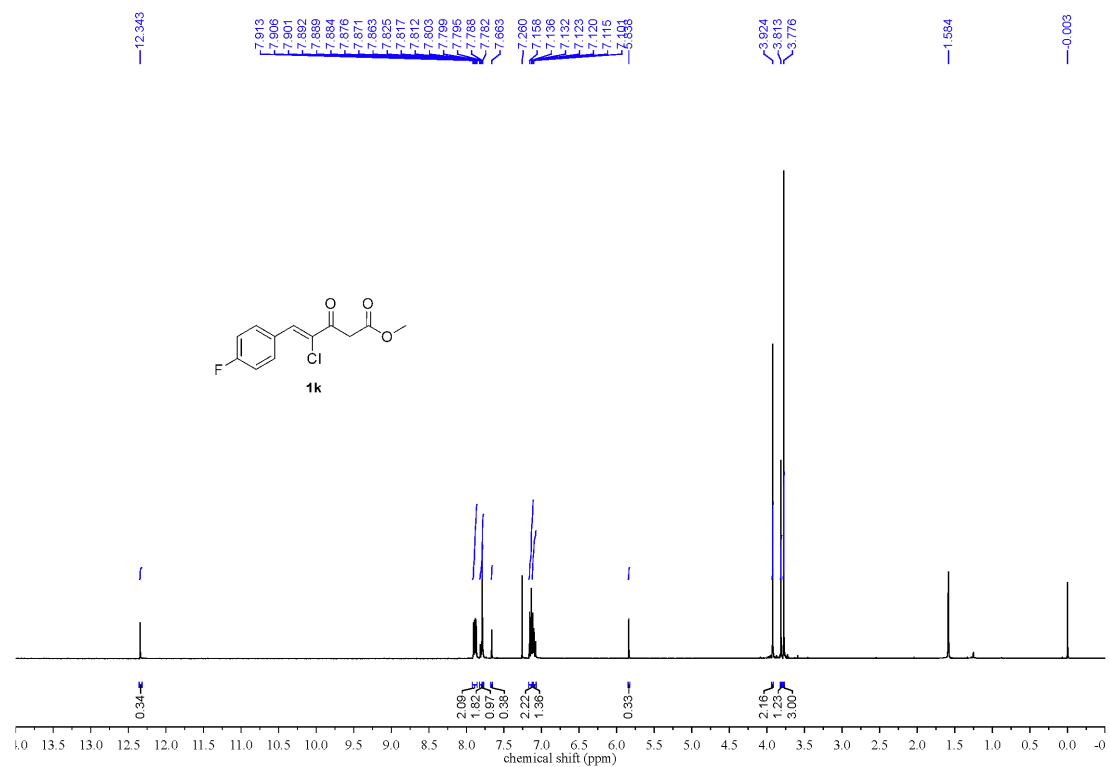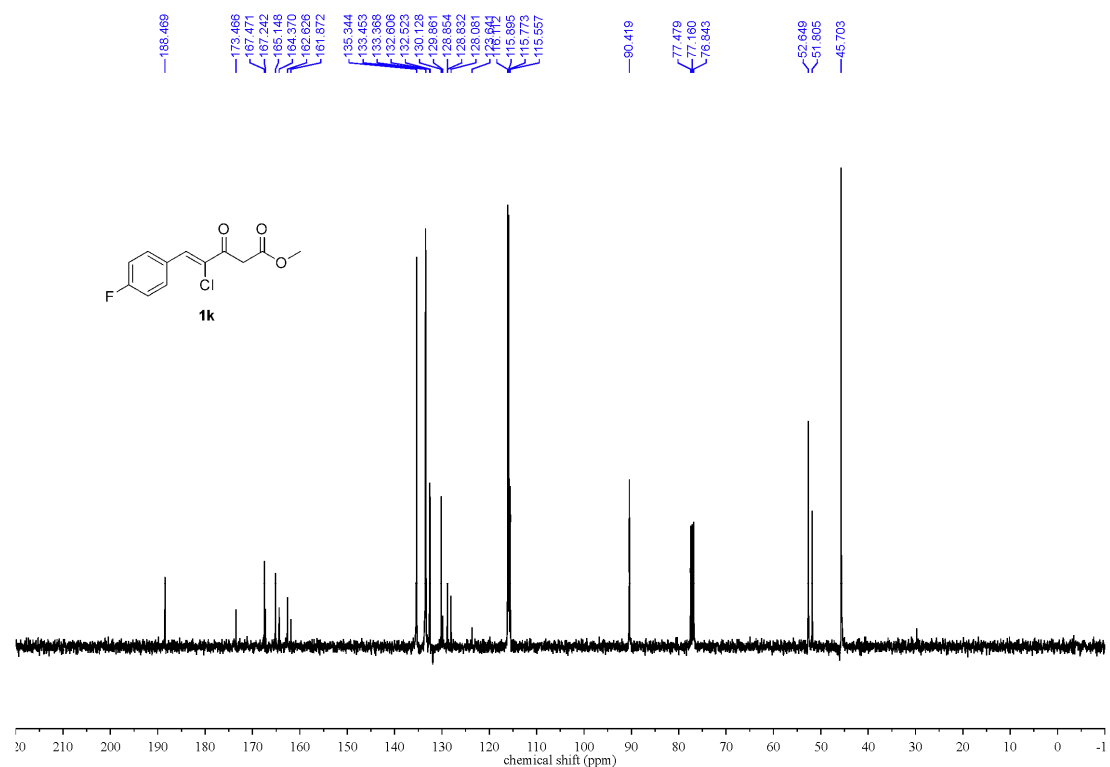

**(Z)-Methyl 5-(4-bromophenyl)-4-chloro-3-oxopent-4-enoate (11)**

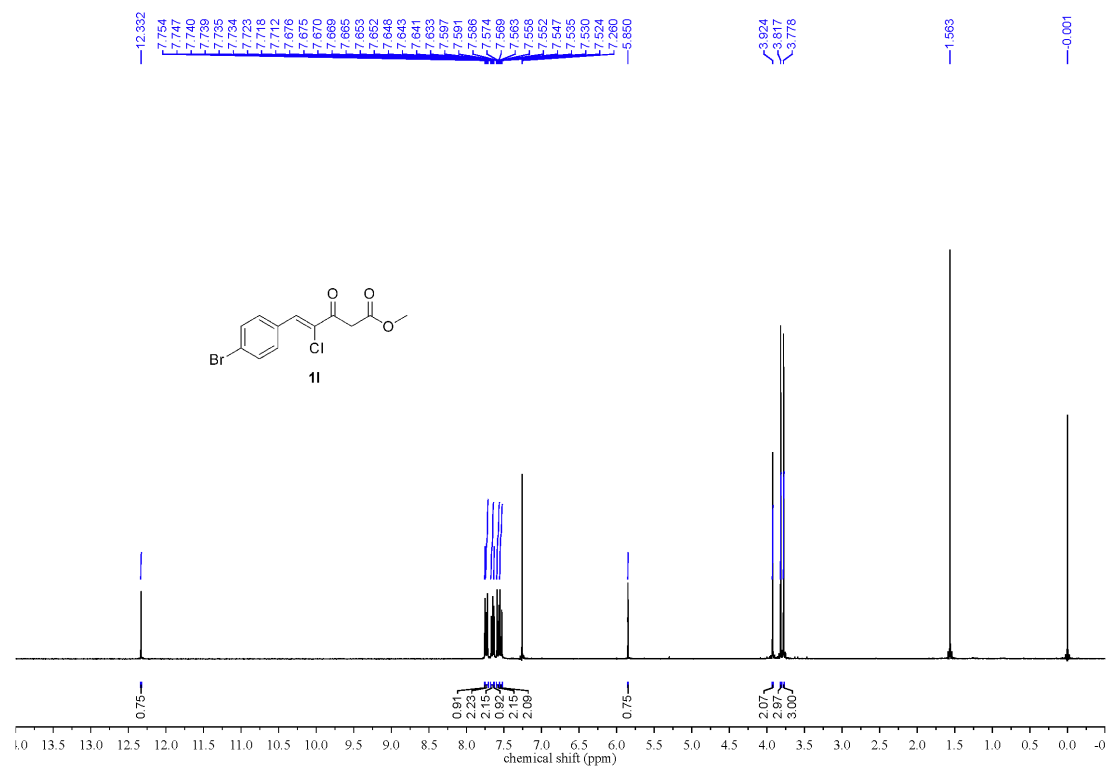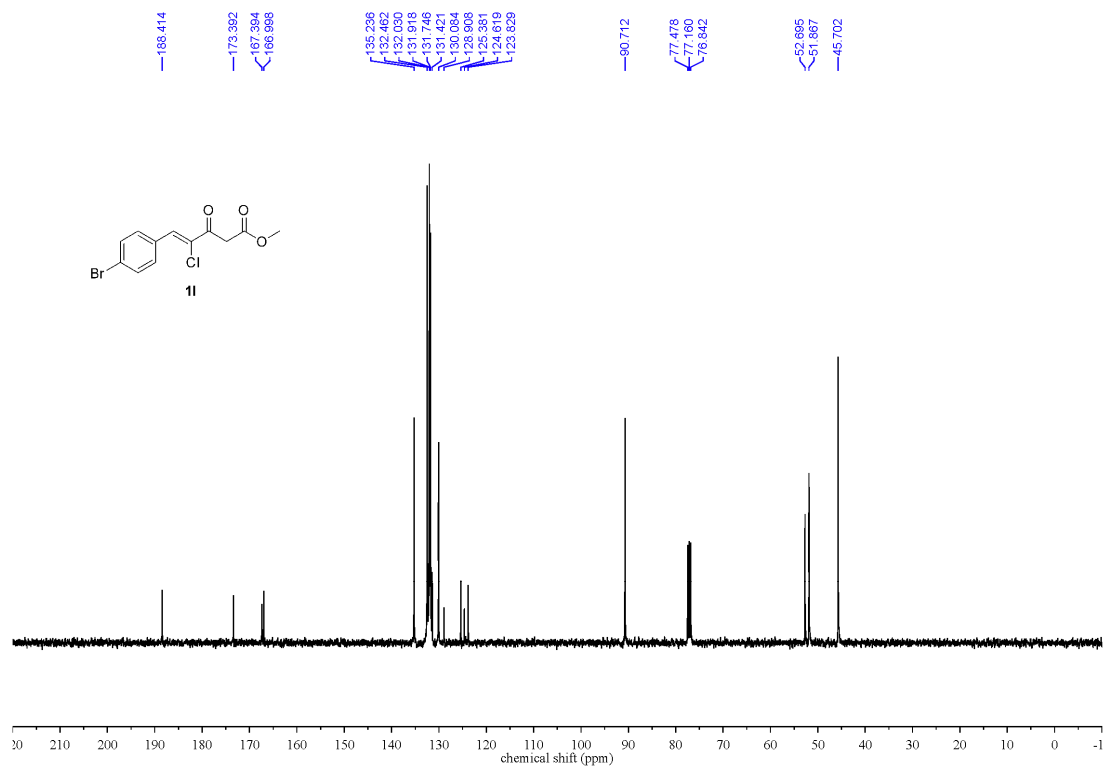

**(Z)-Methyl 4-chloro-3-oxo-5-(4-(trifluoromethyl)phenyl)pent-4-enoate (1m)**

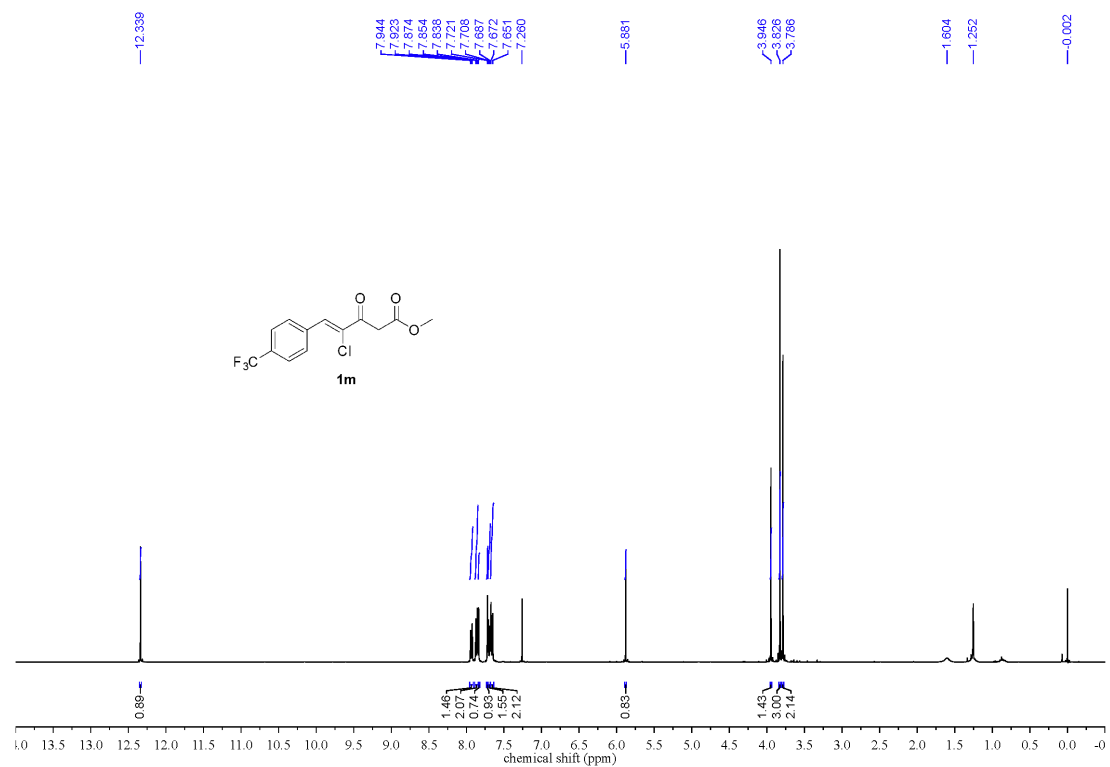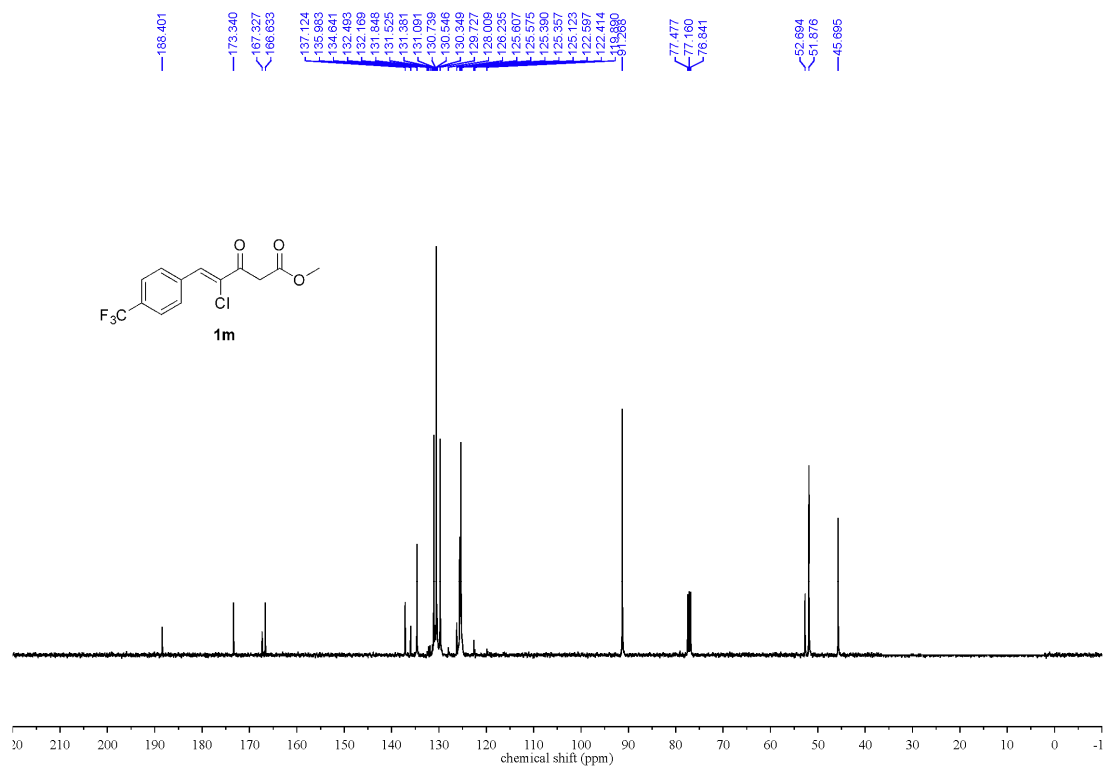

**(4Z,6E)-Methyl 4-chloro-3-oxo-7-phenylhepta-4,6-dienoate (1n)**

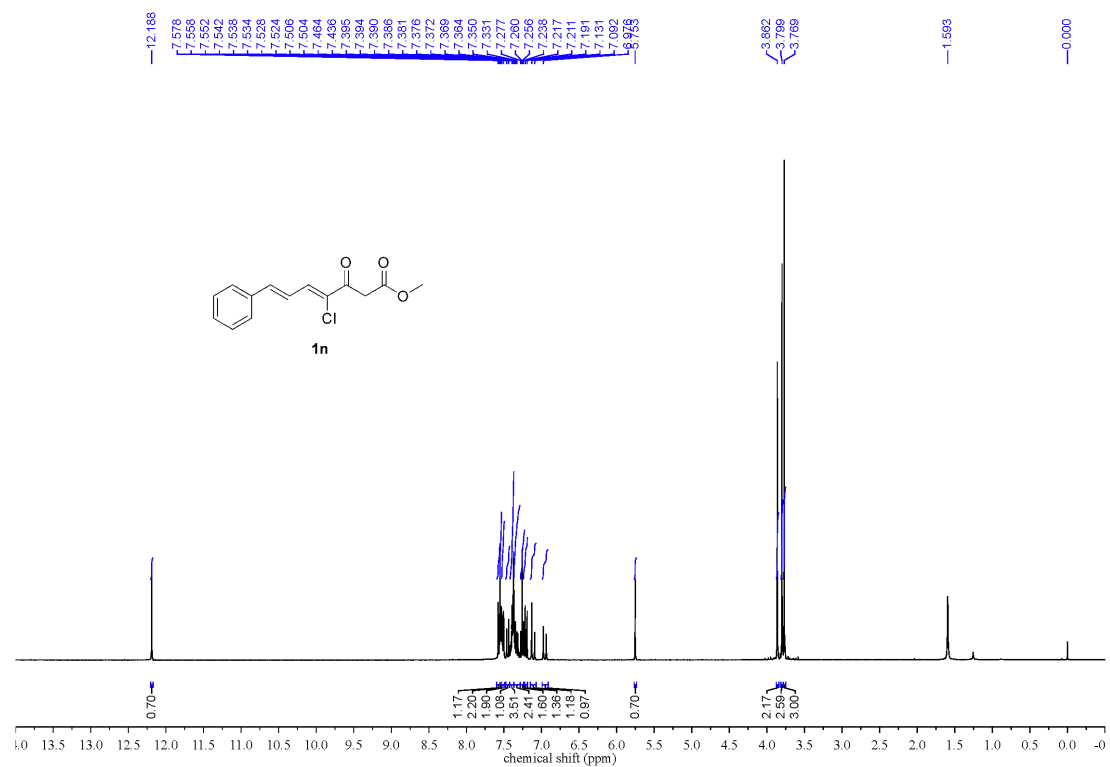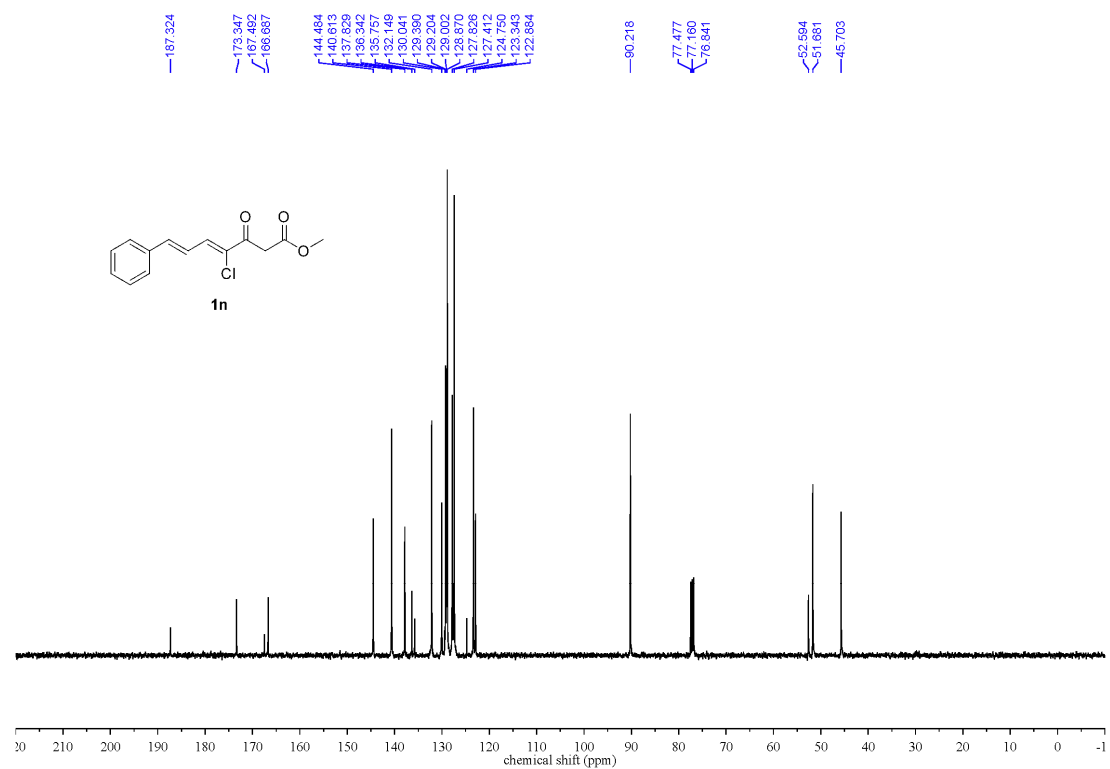

**(Z)-Ethyl 4-chloro-3-hydroxy-5-phenylpent-4-enoate (2a)**

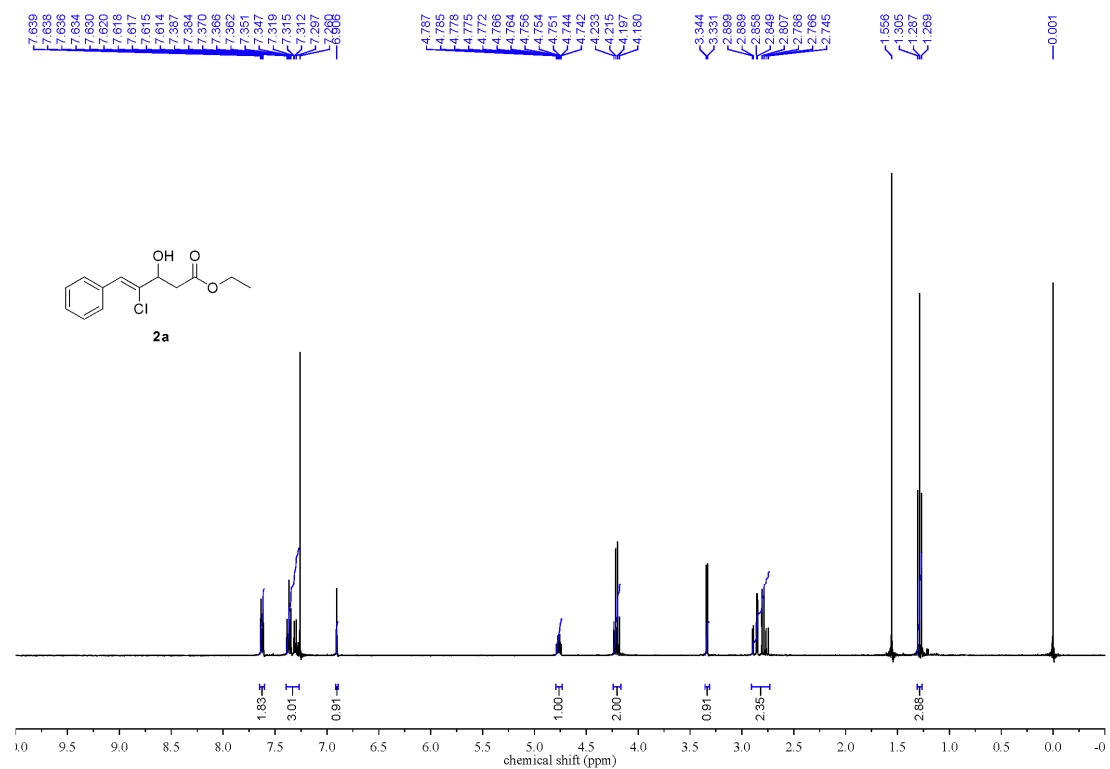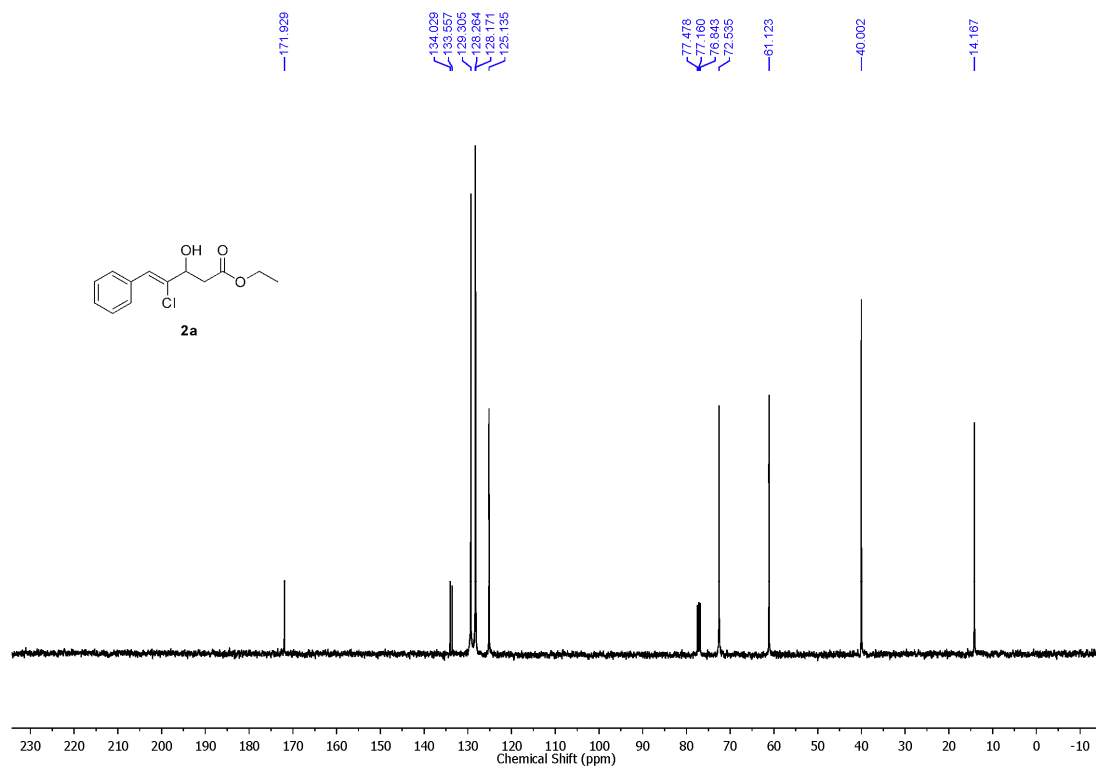

**(Z)-Propyl 4-chloro-3-hydroxy-5-phenylpent-4-enoate (2b)**

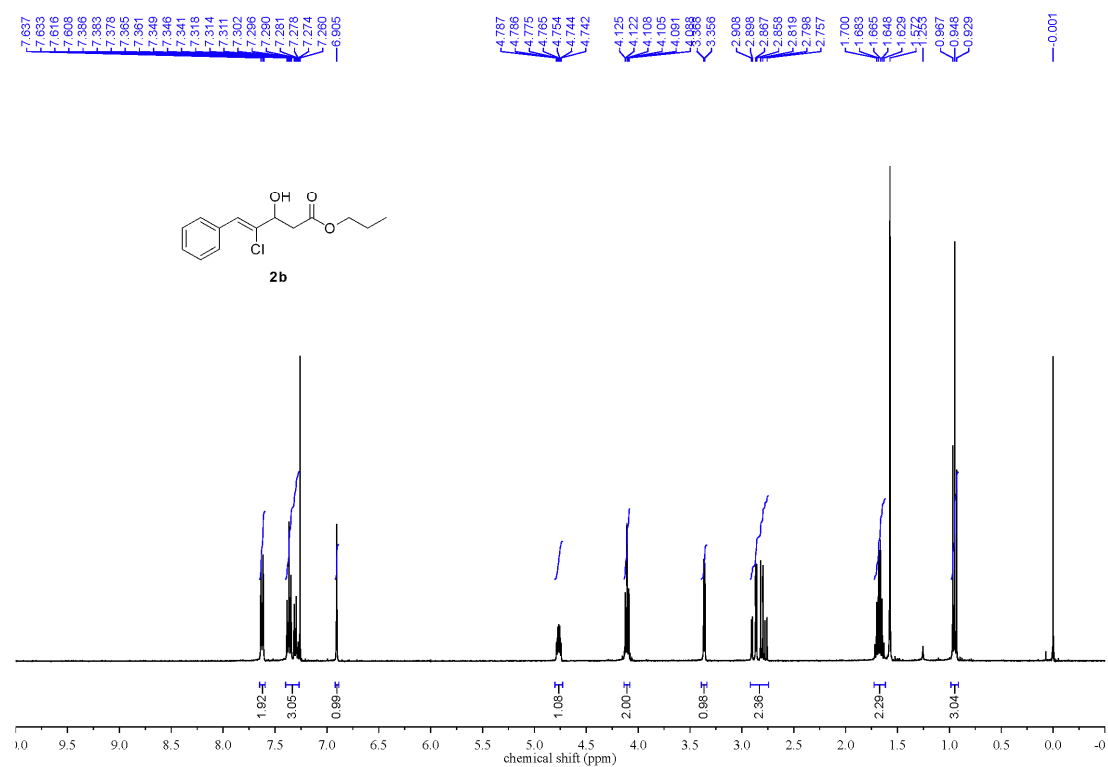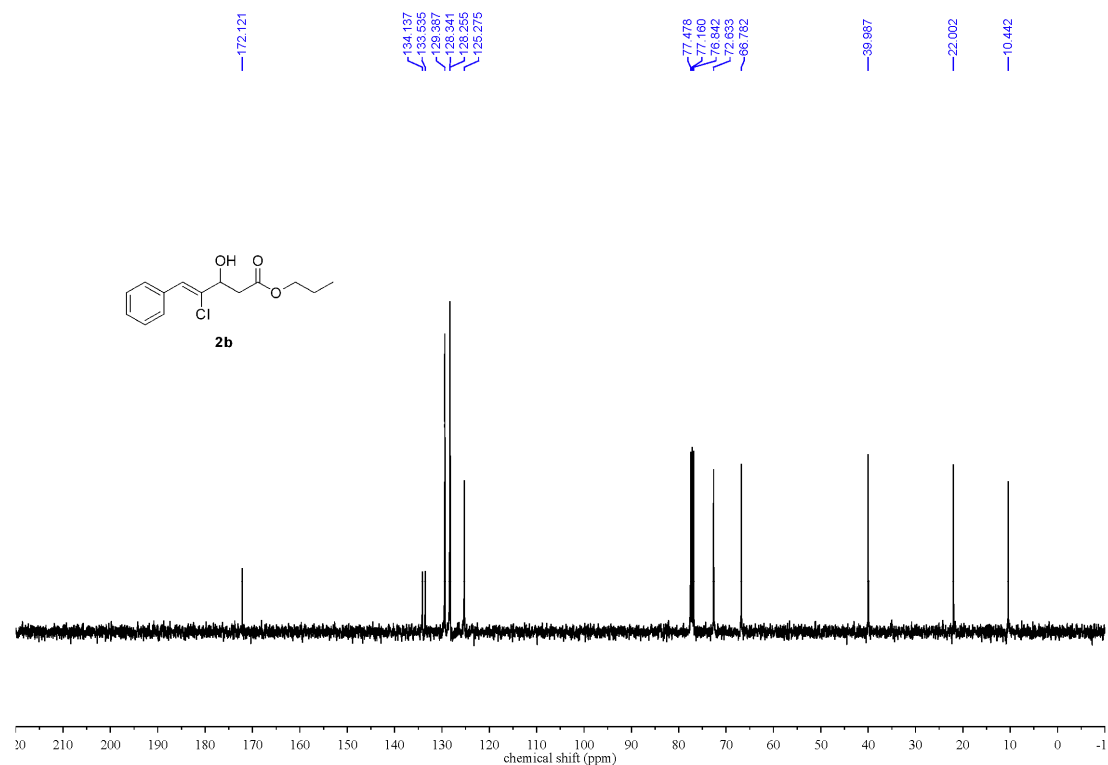

**(Z)-Methyl 4-chloro-3-hydroxy-5-phenylpent-4-enoate (2c)**

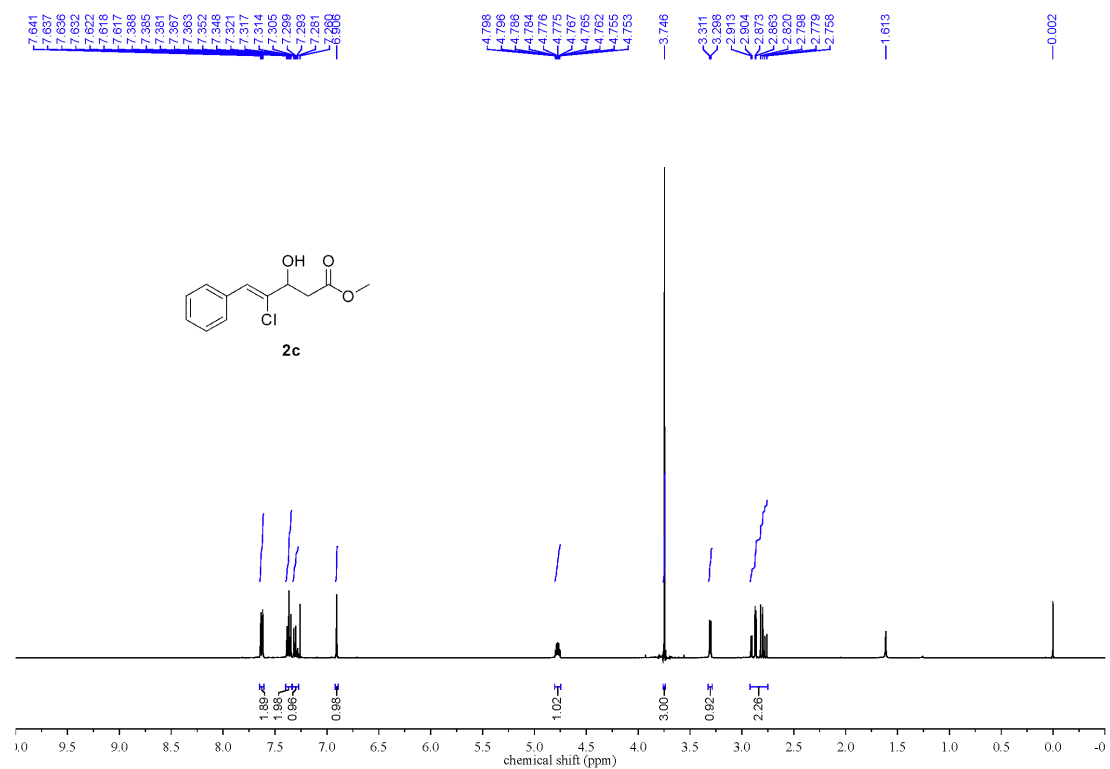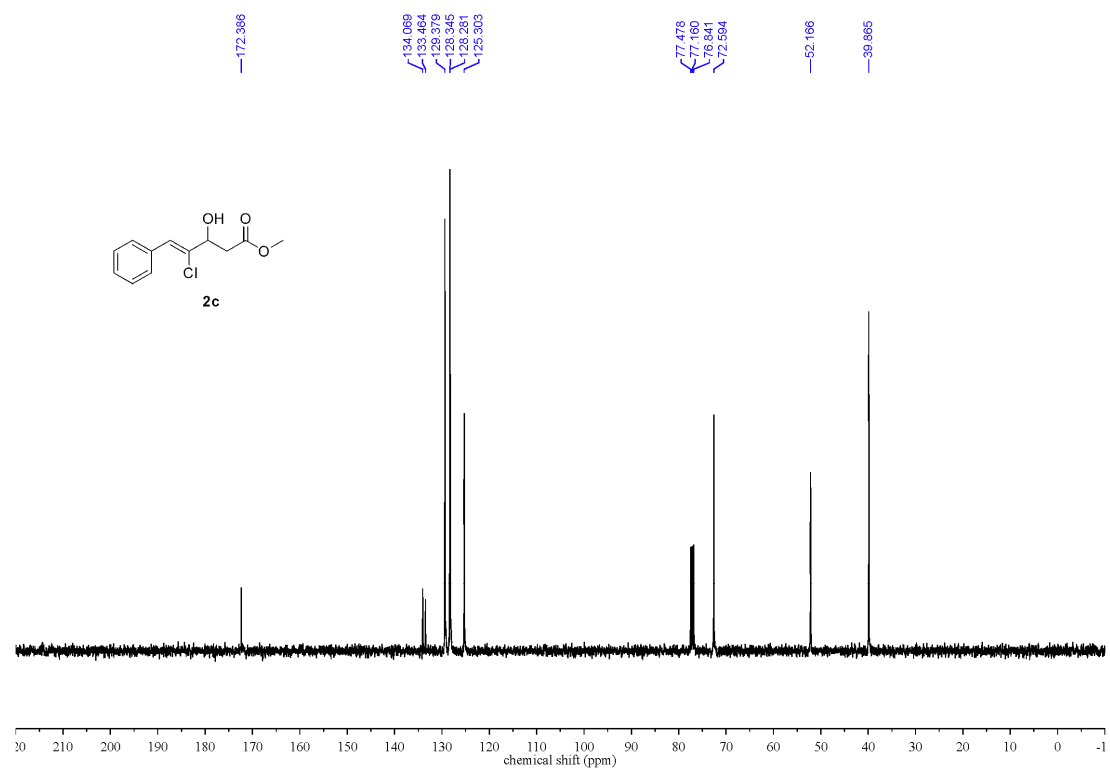

1D-NOE: irradiate on H<sub>a</sub>

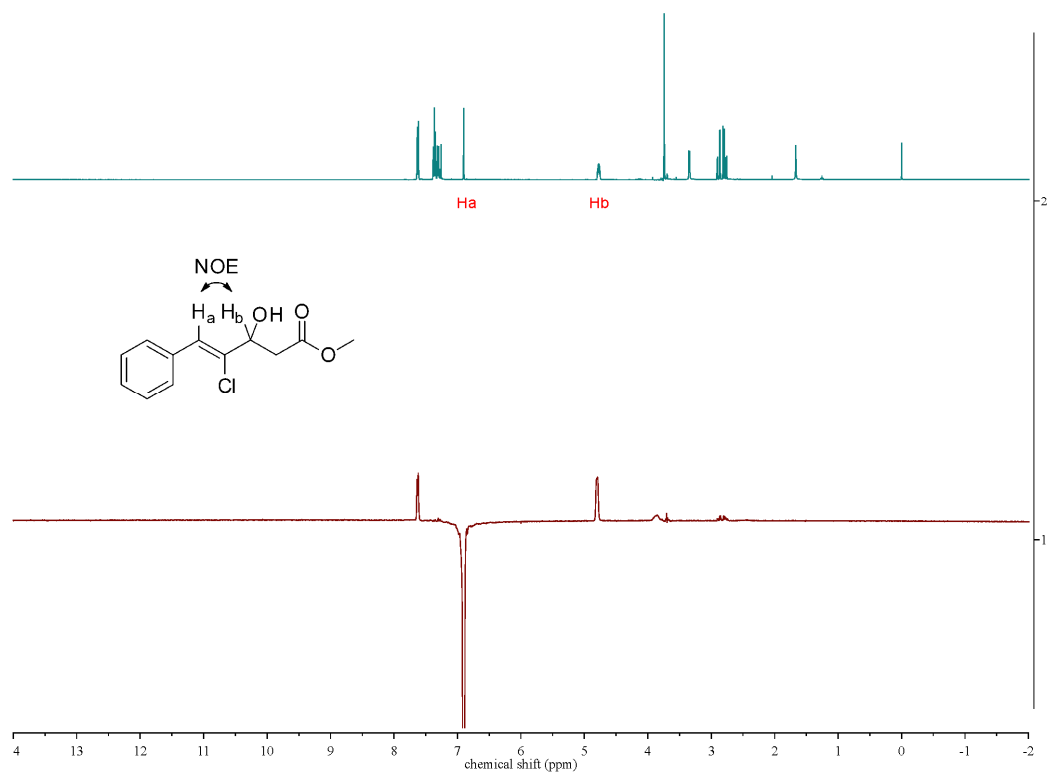

**(Z)-Methyl 4-chloro-3-hydroxy-5-(p-tolyl)pent-4-enoate (2d)**

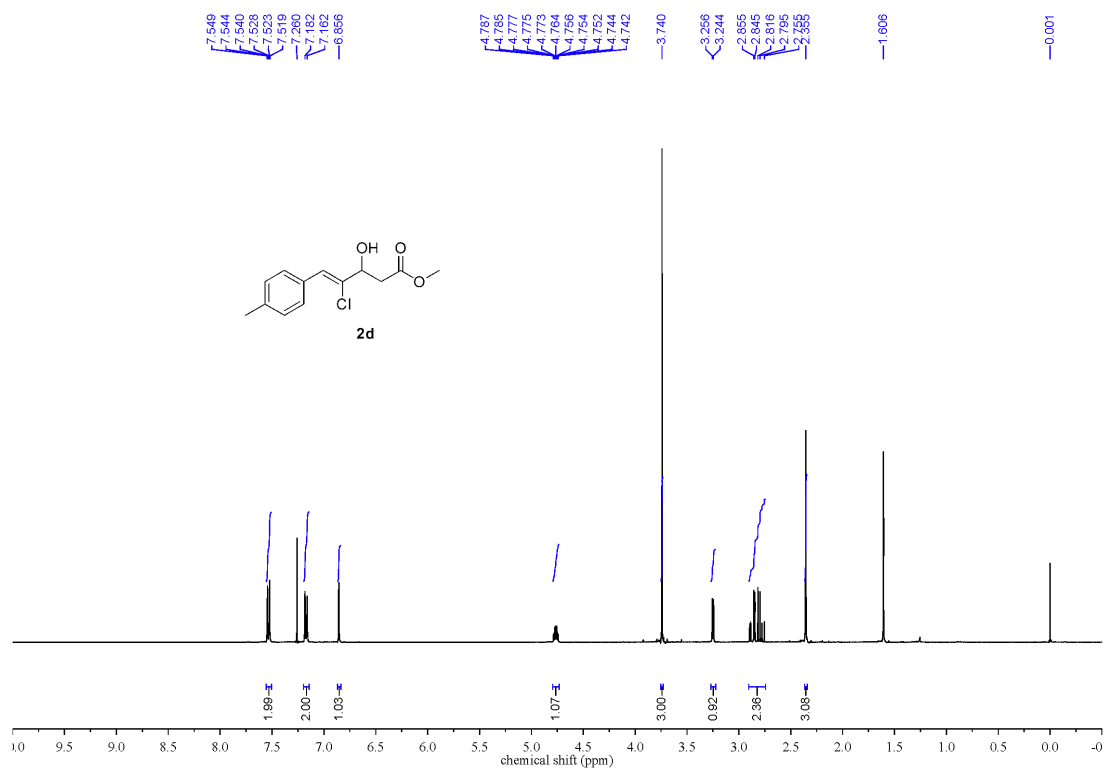



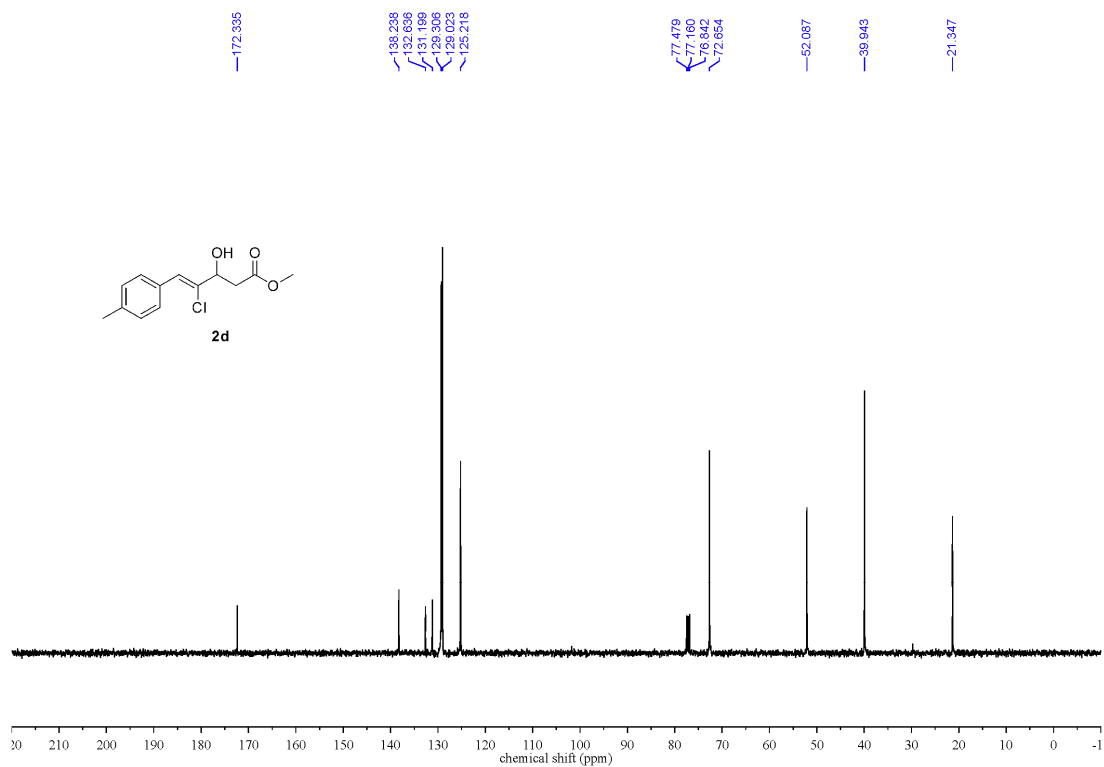

**(Z)-Methyl 4-chloro-3-hydroxy-5-(4-methoxyphenyl)pent-4-enoate (2e)**

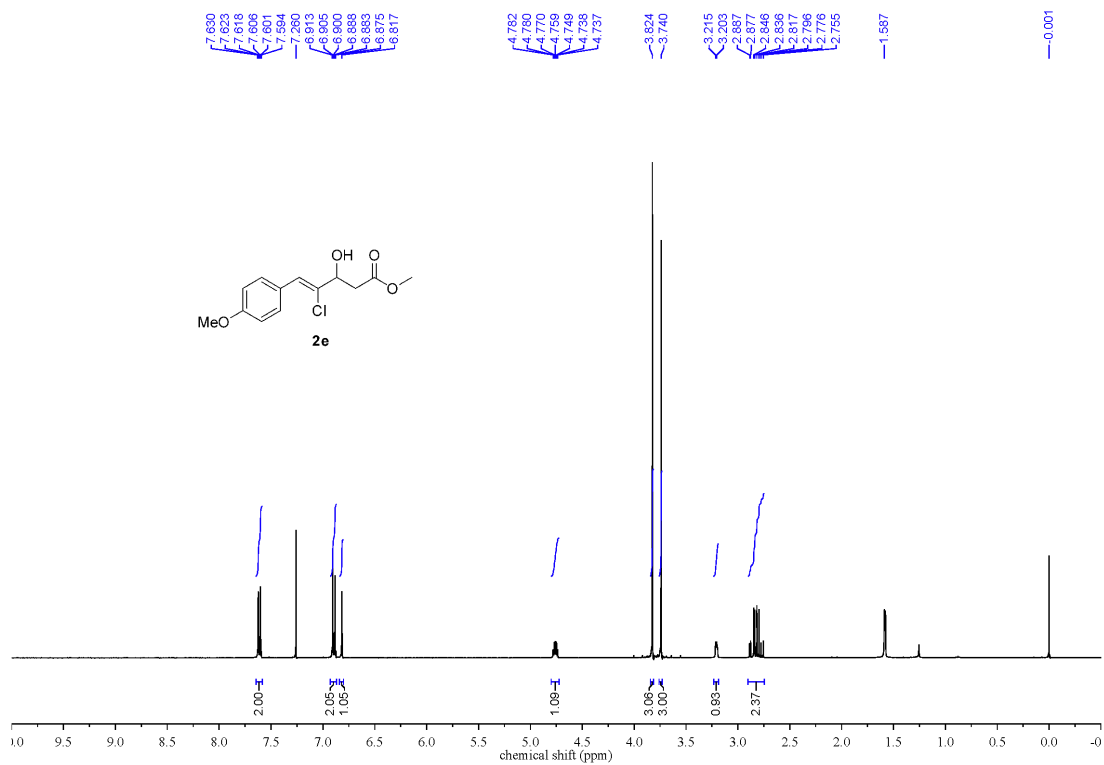

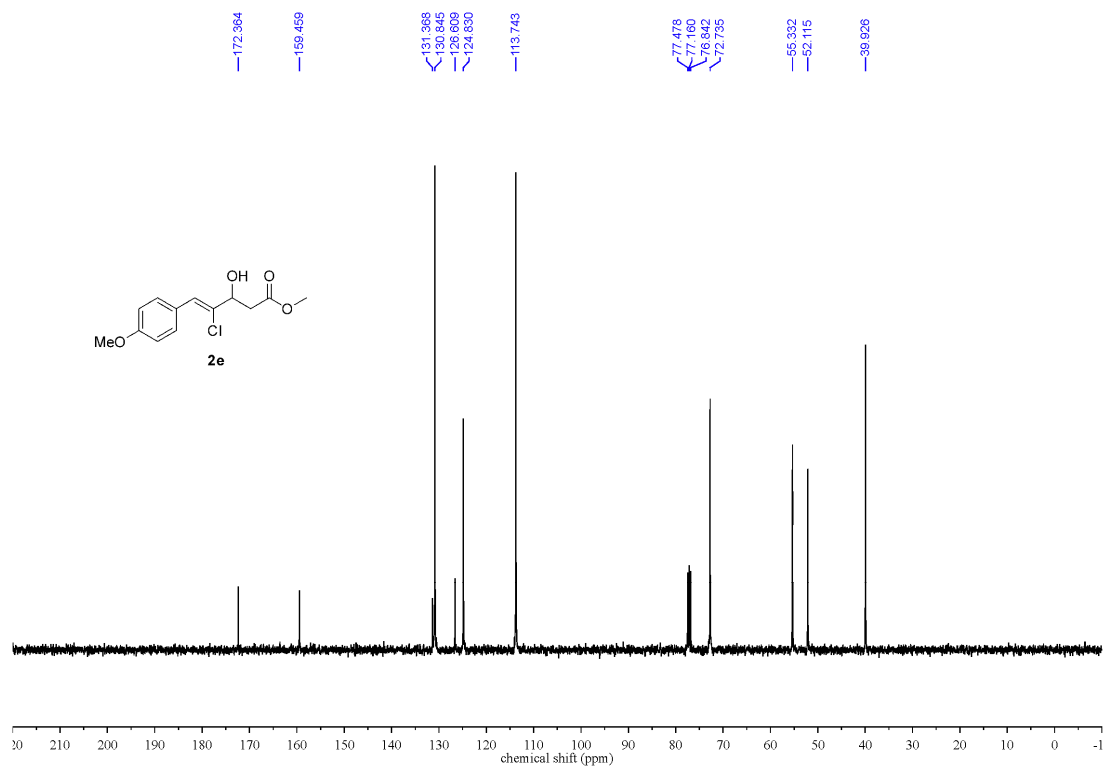

**(Z)-Methyl 4-chloro-3-hydroxy-5-(3-methoxyphenyl)pent-4-enoate (2f)**

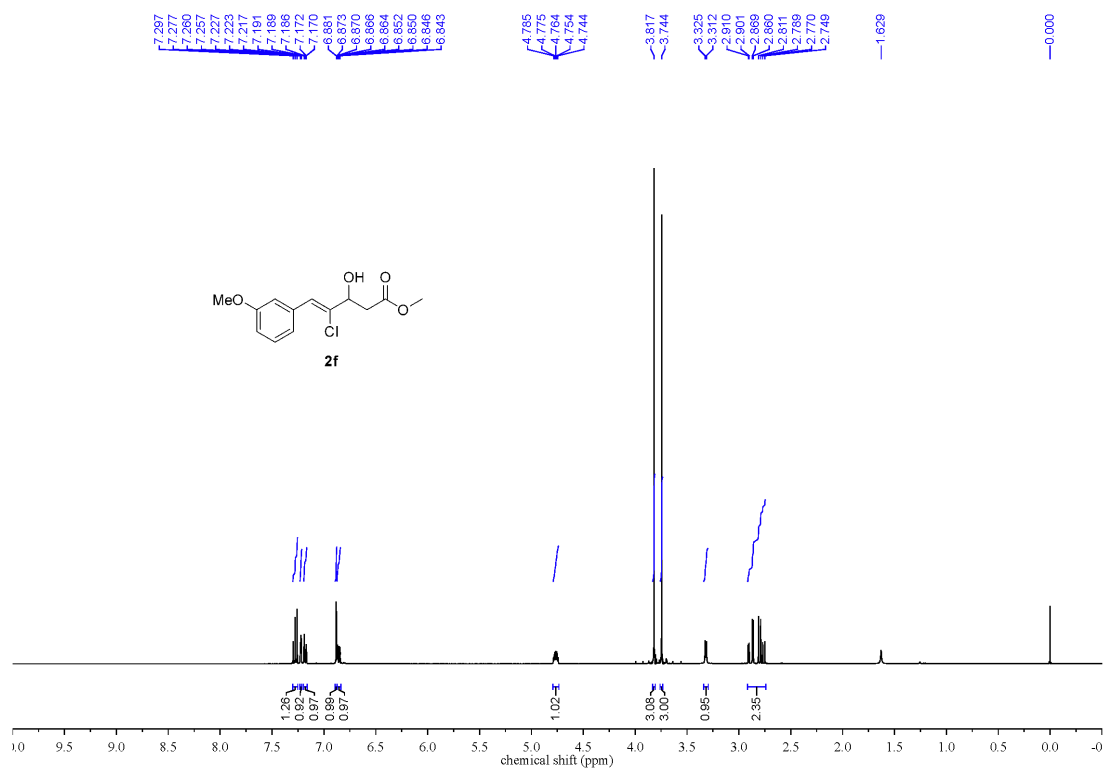

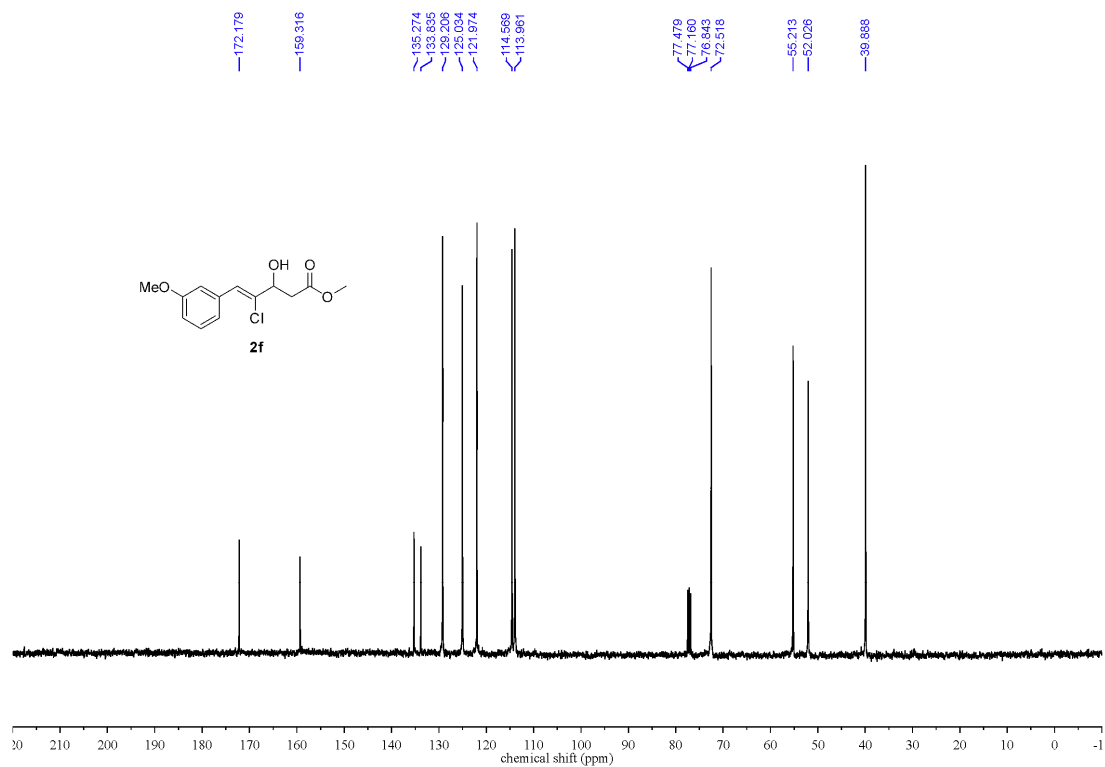

**(Z)-Methyl 4-chloro-3-hydroxy-5-(2-methoxyphenyl)pent-4-enoate (2g)**

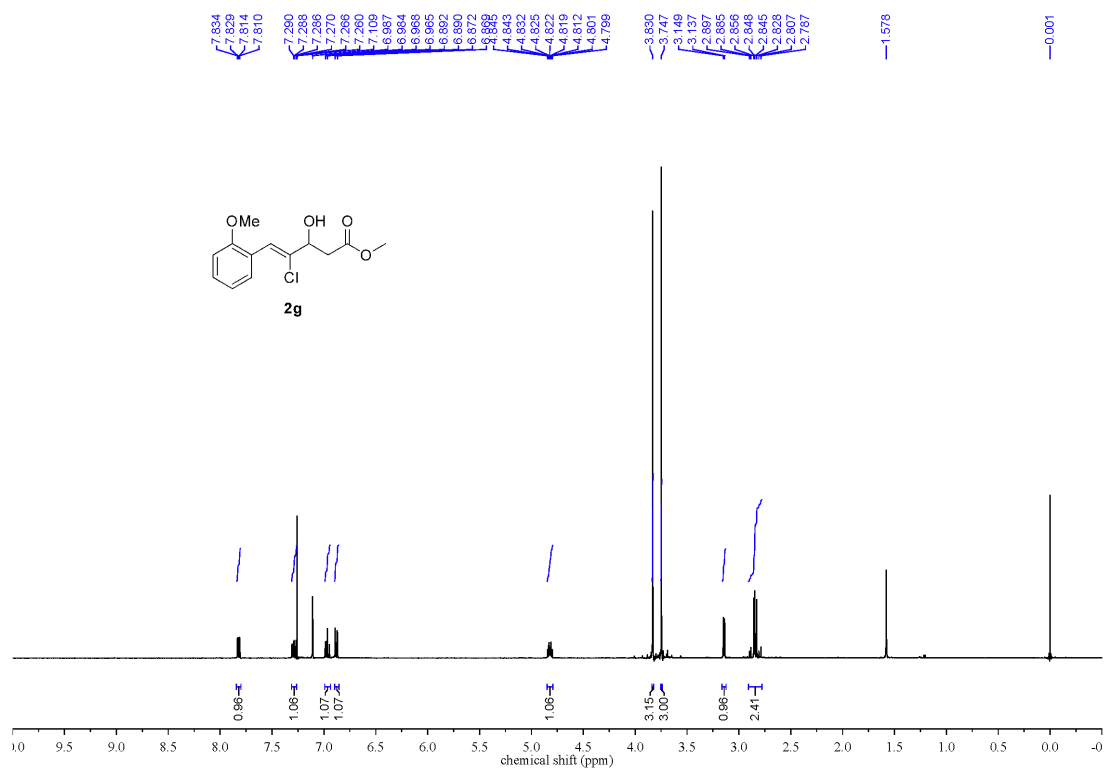

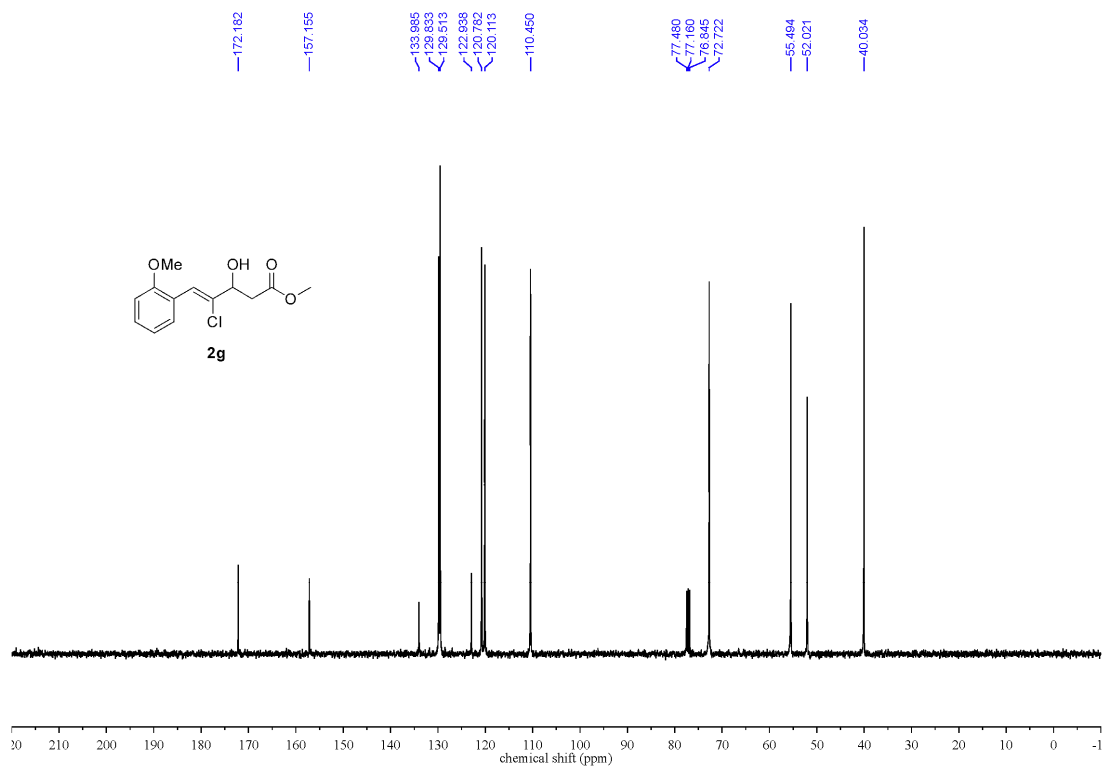

**(Z)-Methyl 4-chloro-5-(4-chlorophenyl)-3-hydroxypent-4-enoate (2h)**

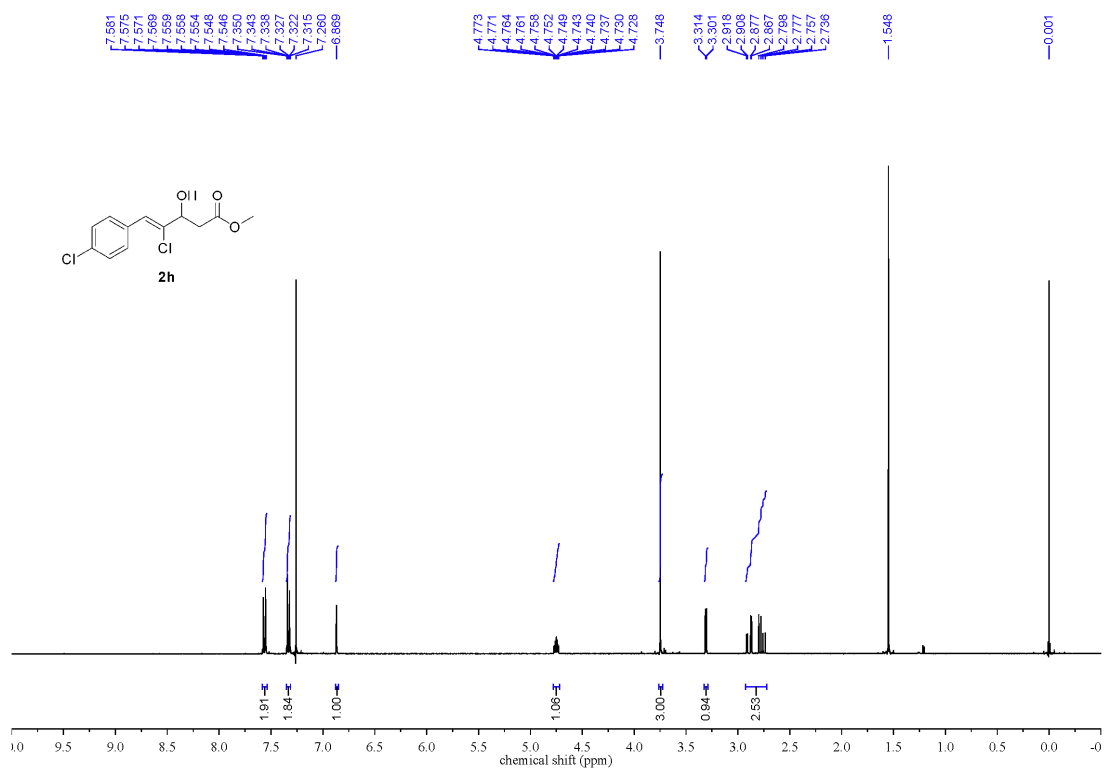

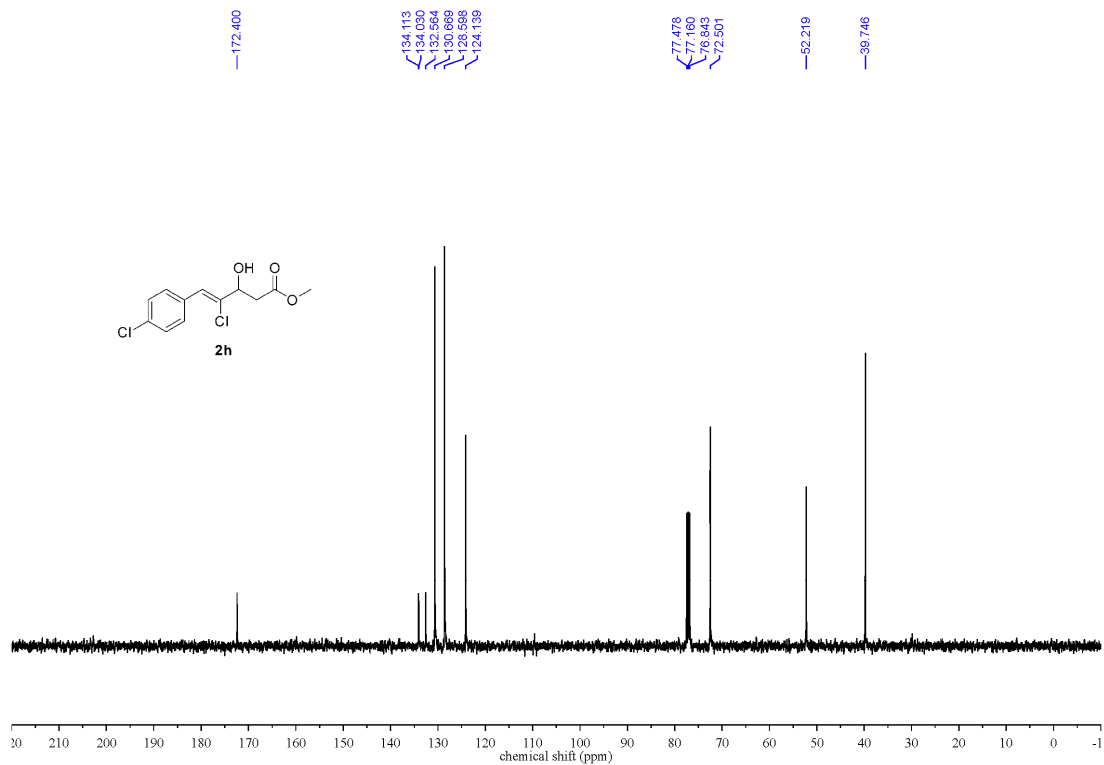

**(Z)-Methyl 4-chloro-5-(3-chlorophenyl)-3-hydroxypent-4-enoate (2i)**

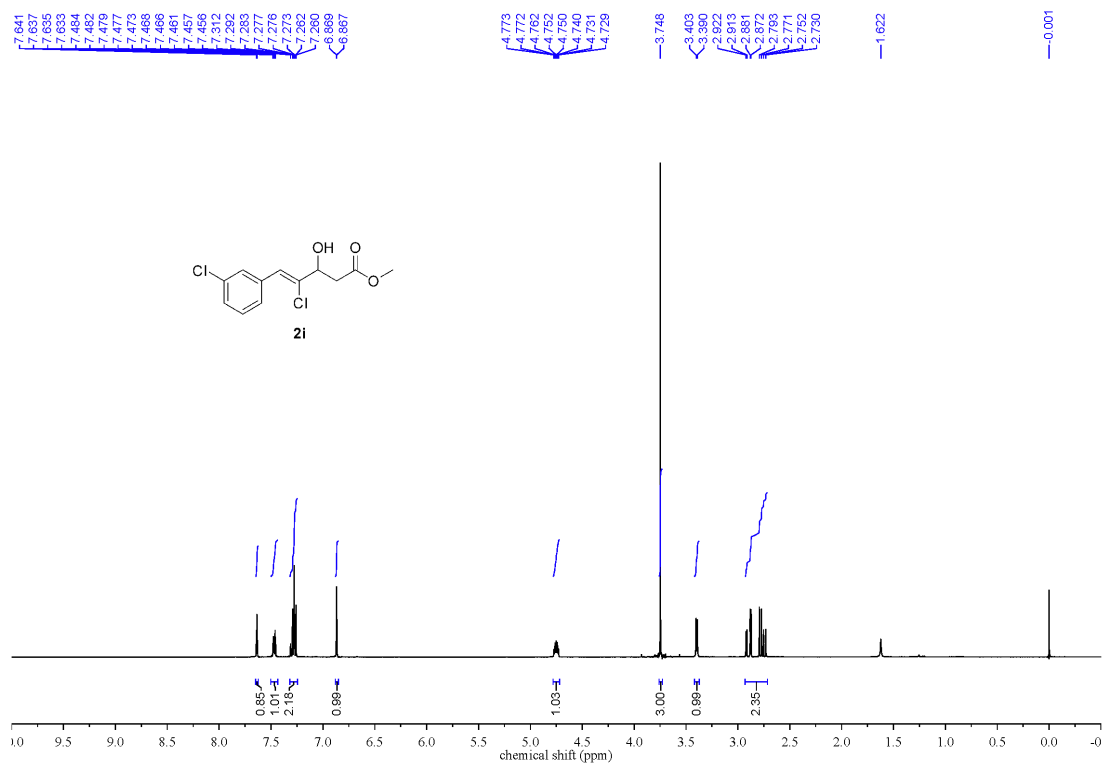

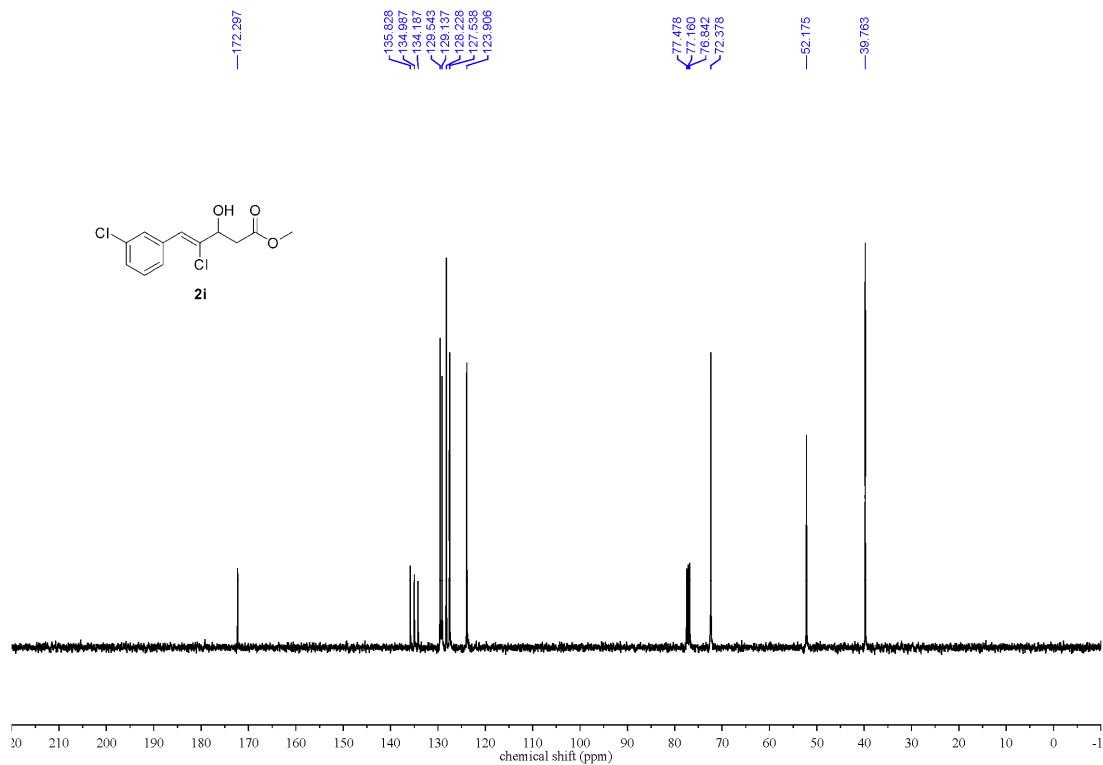

**(Z)-Methyl 4-chloro-5-(2-chlorophenyl)-3-hydroxypent-4-enoate (2j)**

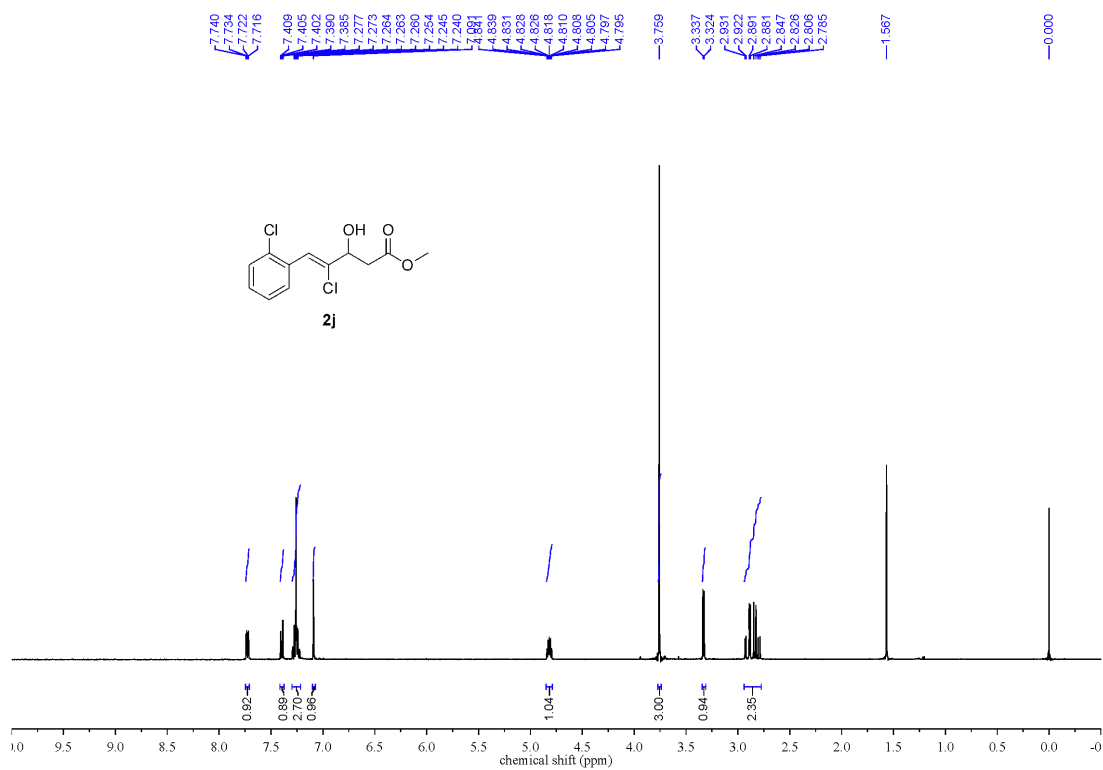

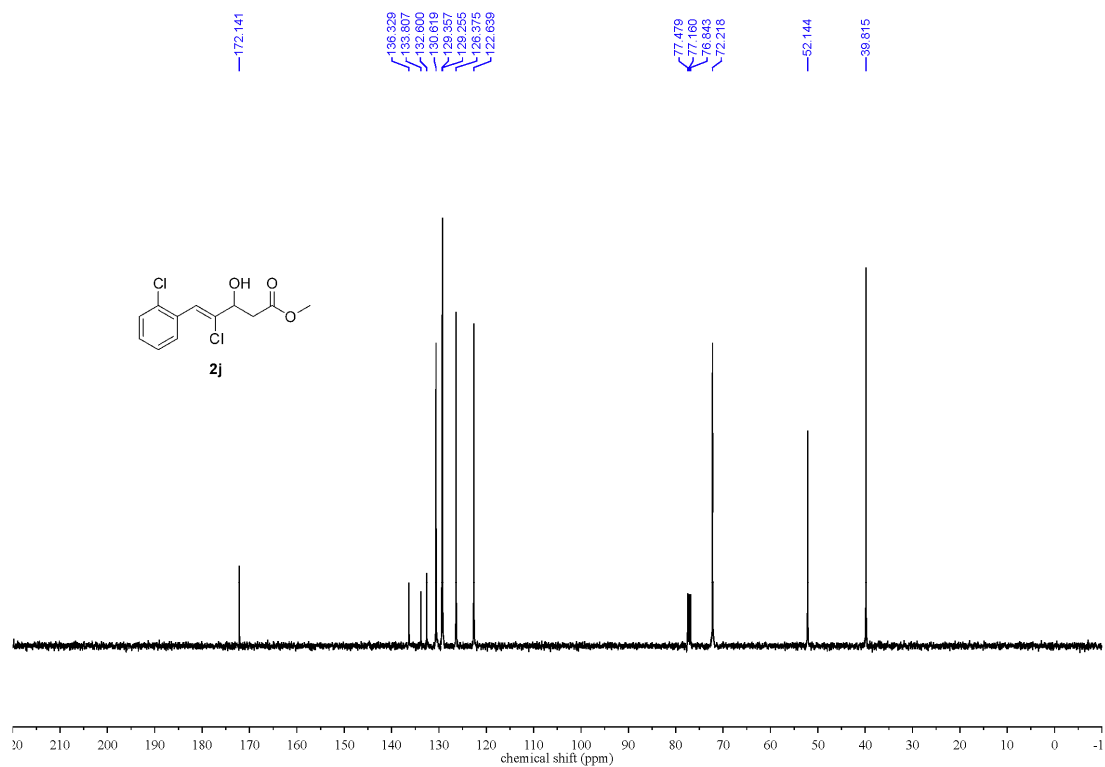

**(Z)-Methyl 4-chloro-5-(4-fluorophenyl)-3-hydroxypent-4-enoate (2k)**

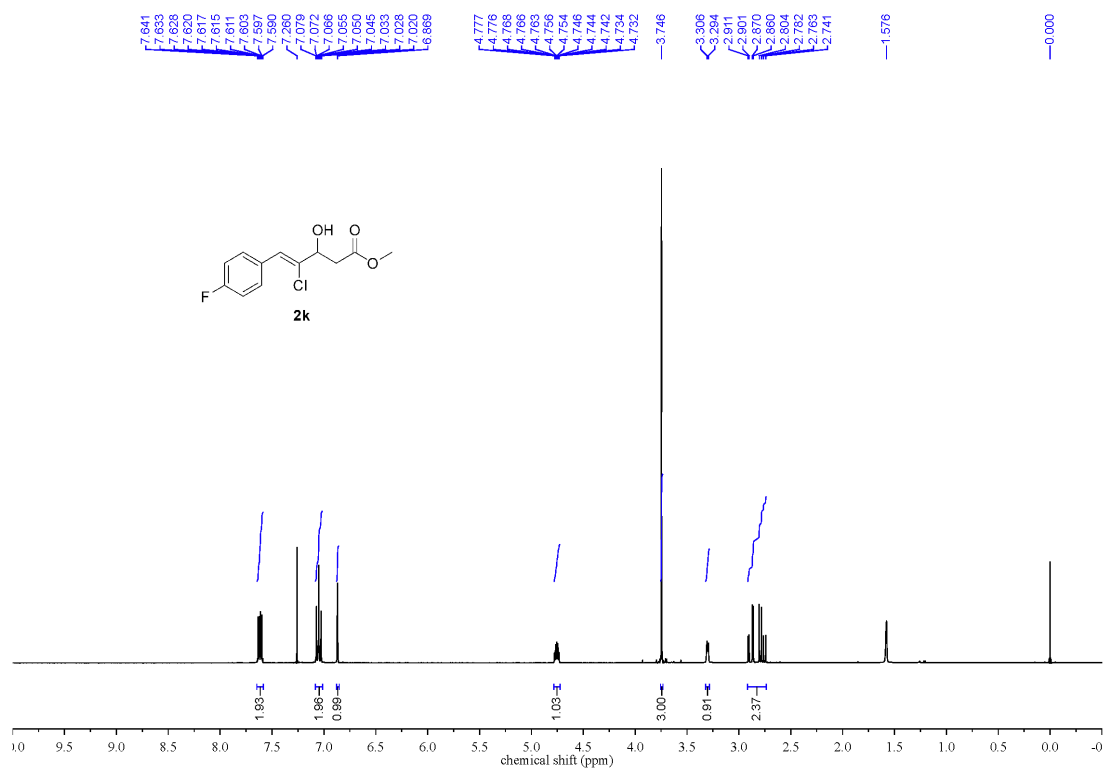

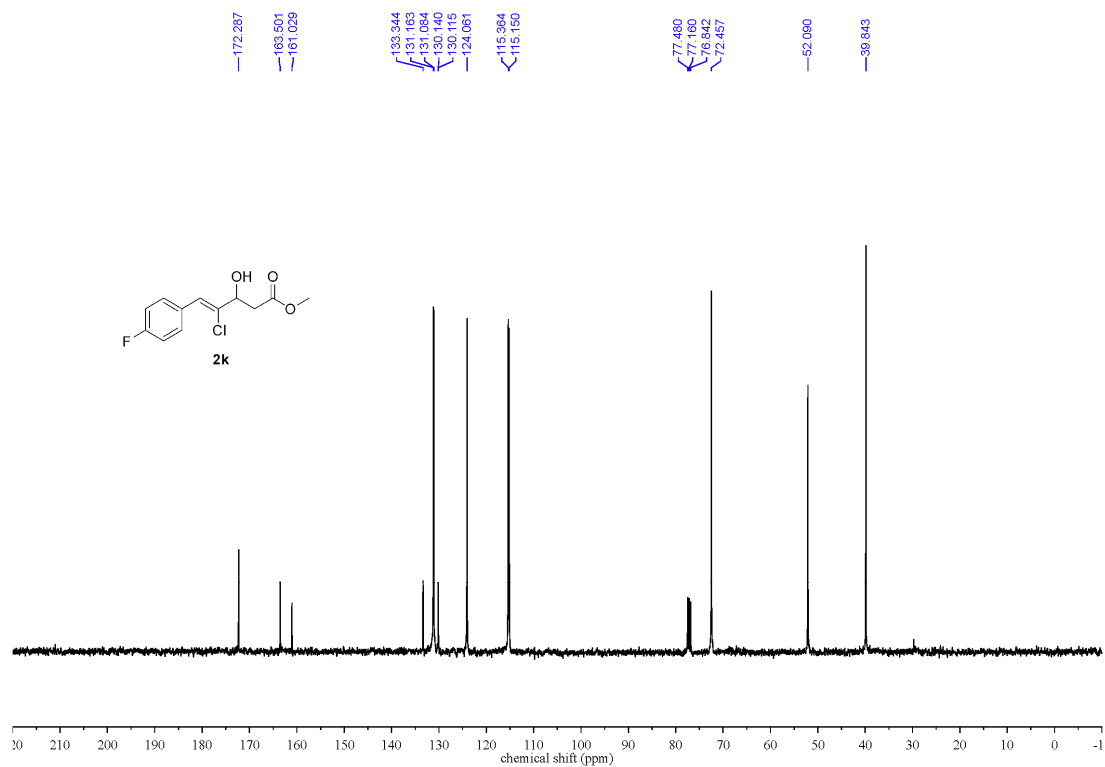

**(Z)-Methyl 5-(4-bromophenyl)-4-chloro-3-hydroxypent-4-enoate (2l)**

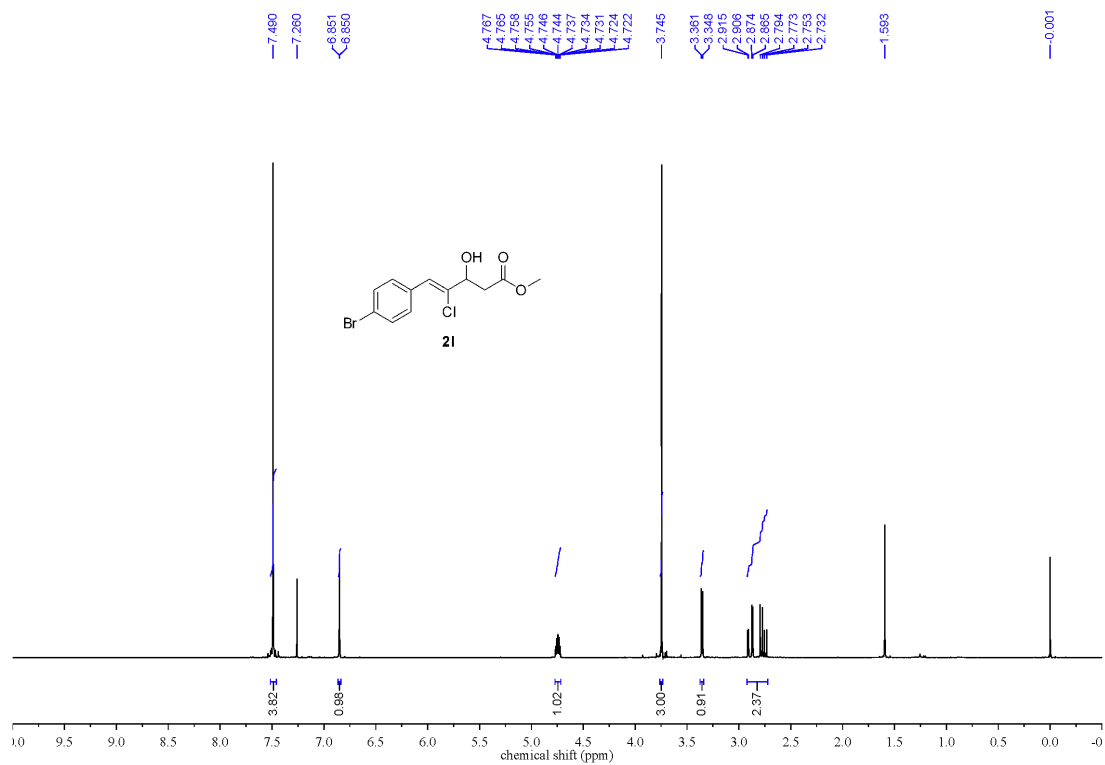



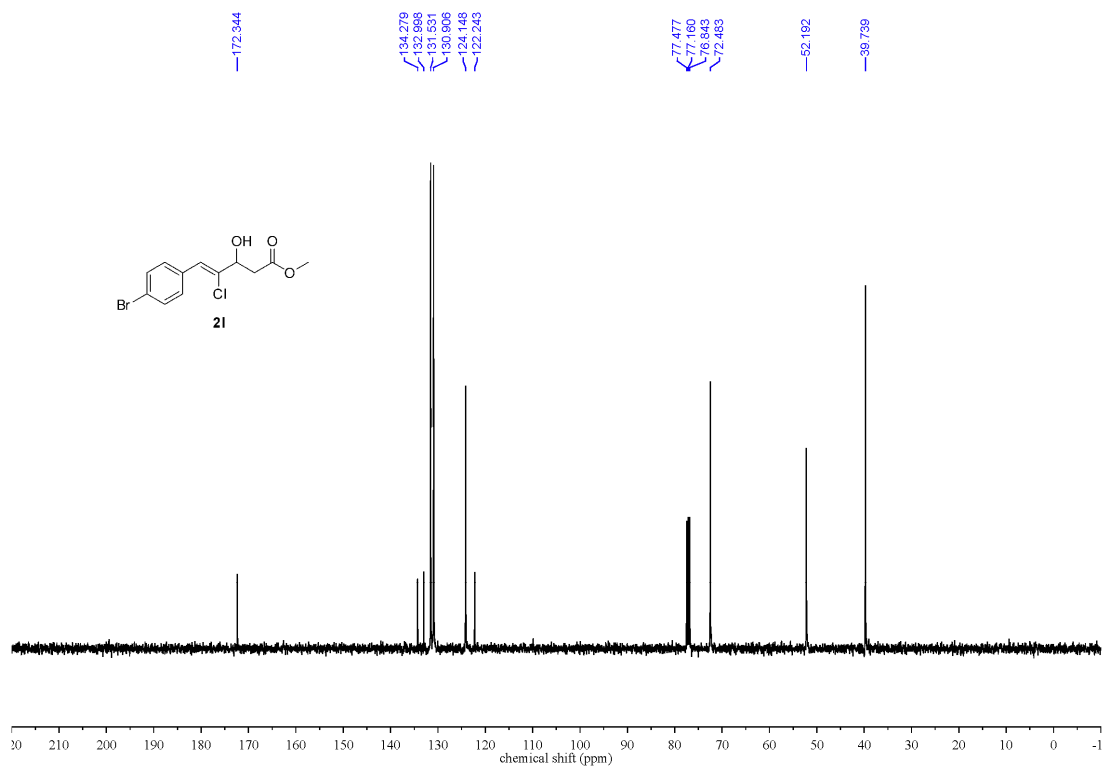

**(Z)-Methyl 4-chloro-3-hydroxy-5-(4-(trifluoromethyl)phenyl)pent-4-enoate (2m)**

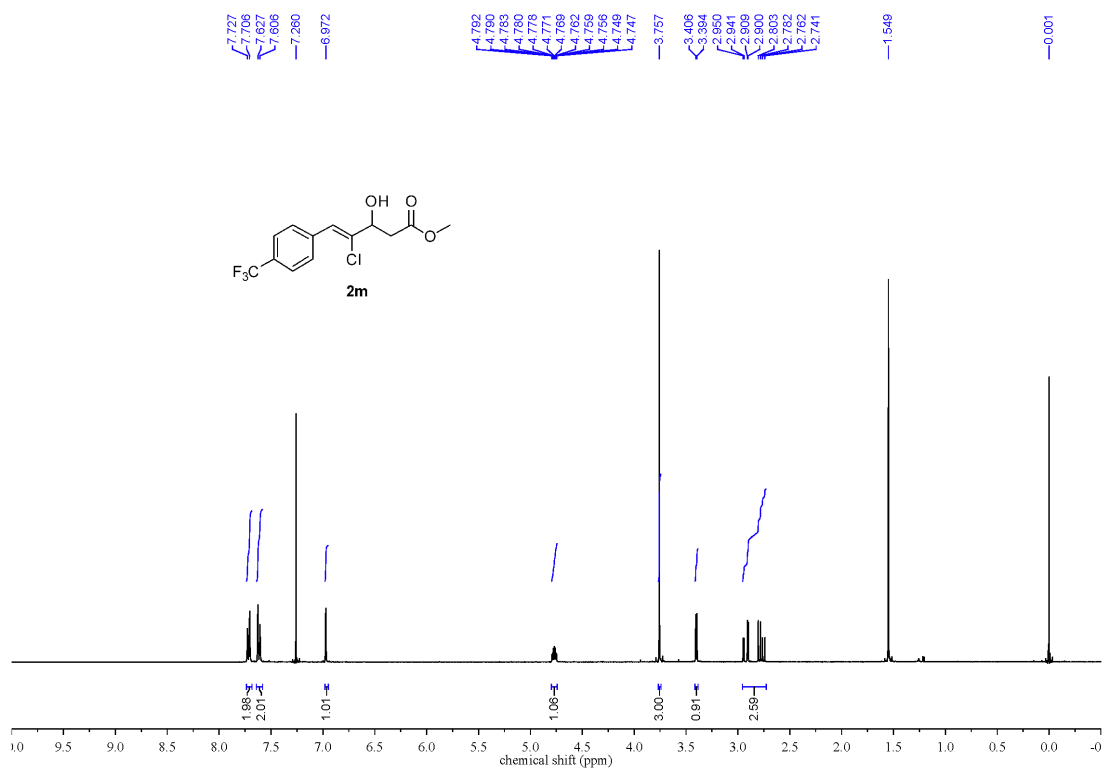

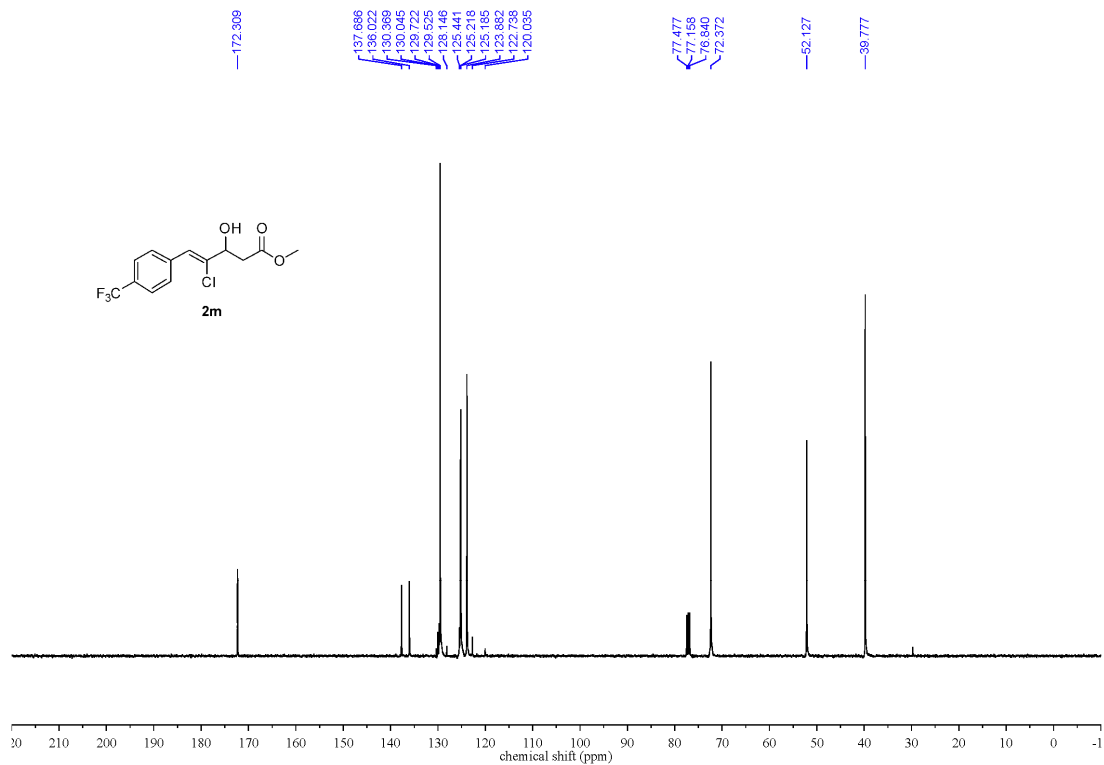

**(4Z,6E)-Methyl 4-chloro-3-hydroxy-7-phenylhepta-4,6-dienoate (2n)**

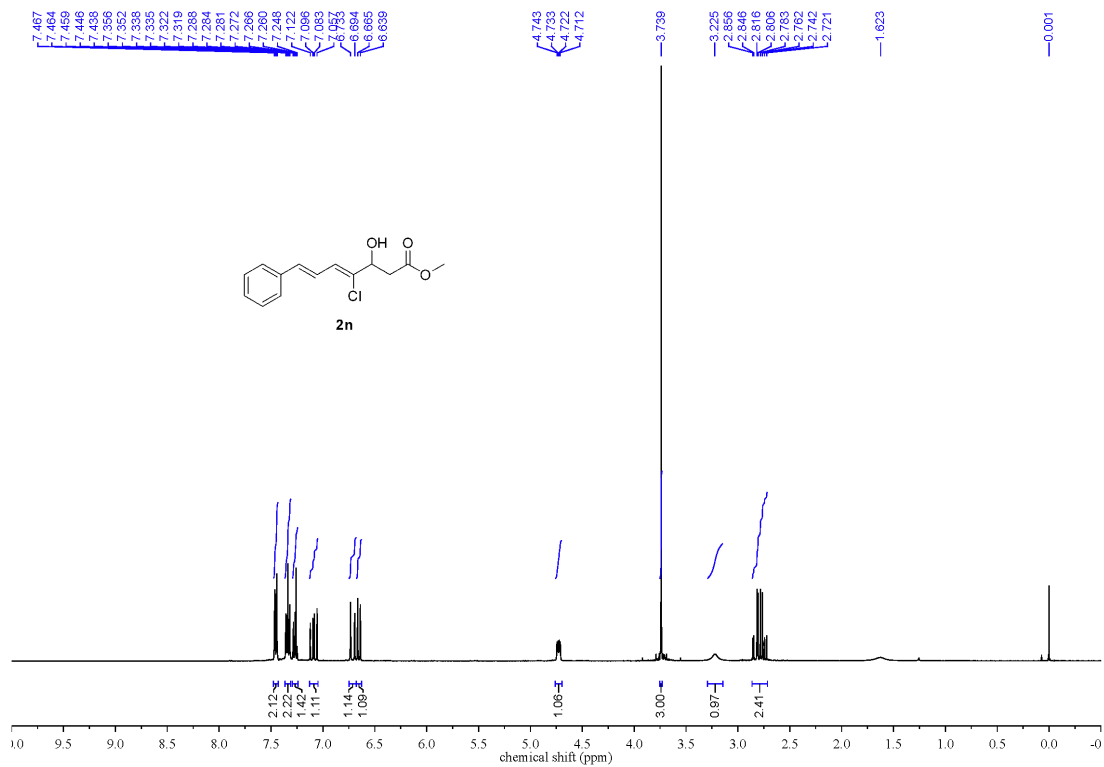

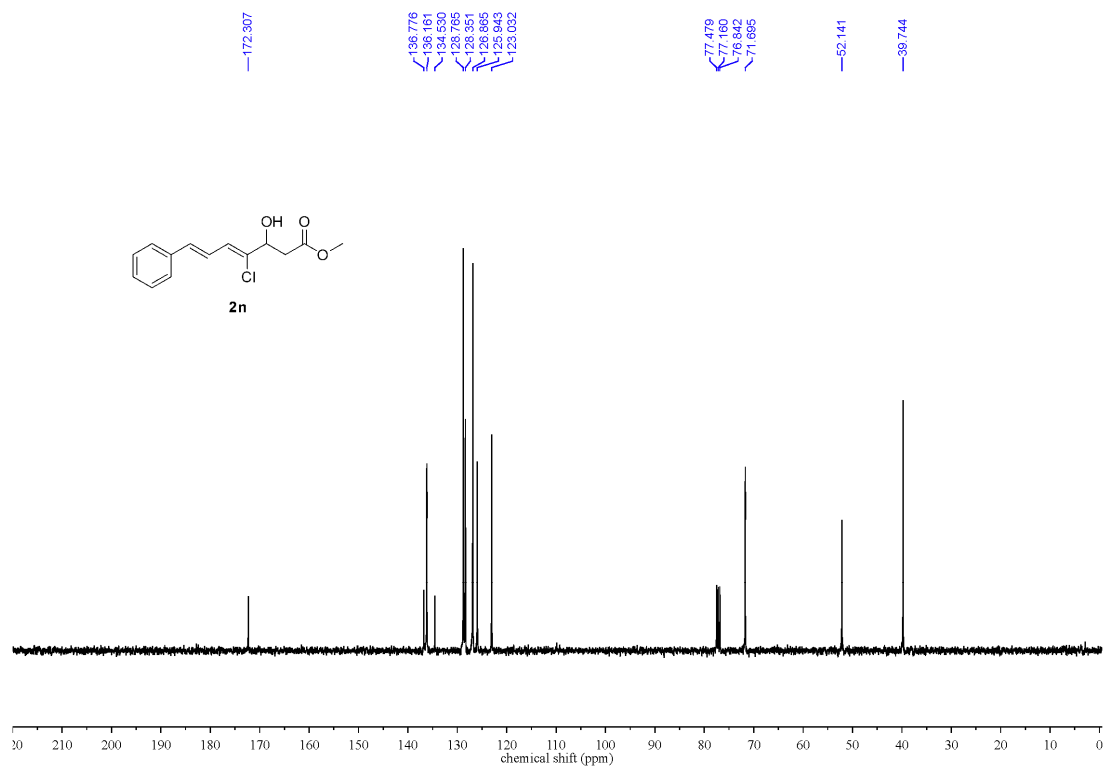

1D-NOE: irradiate on H<sub>a</sub>

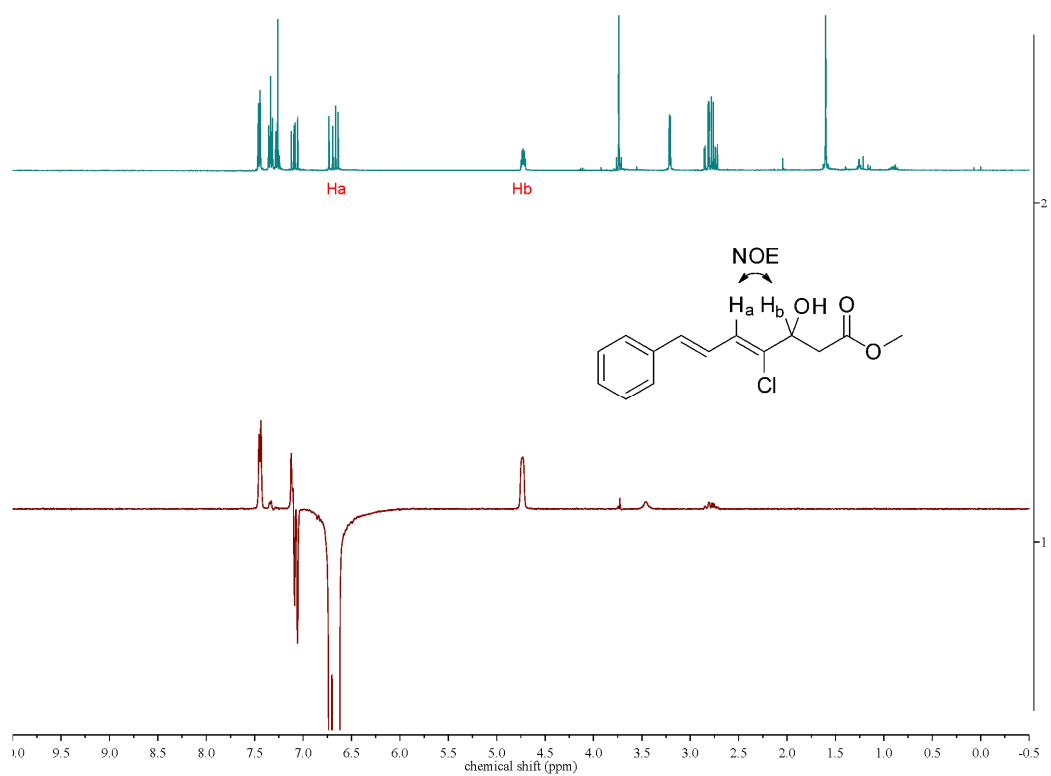



**(Z)-Methyl 4-bromo-5-(4-methoxyphenyl)-3-oxopent-4-enoate (3b)**

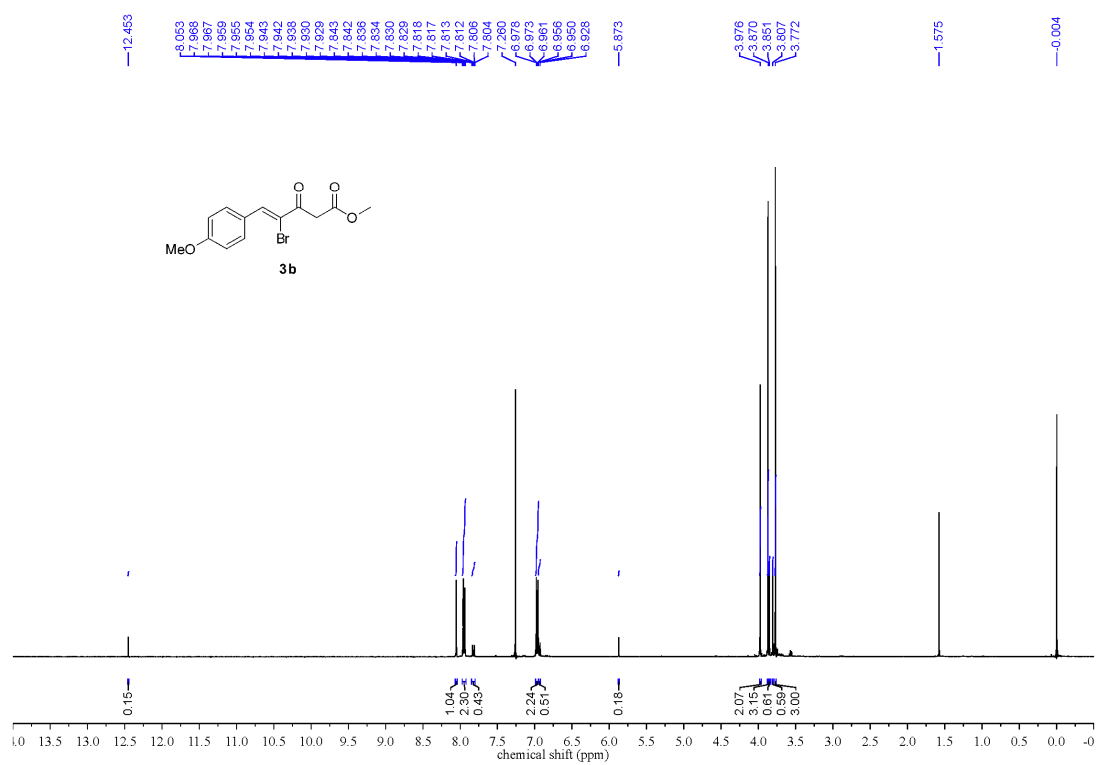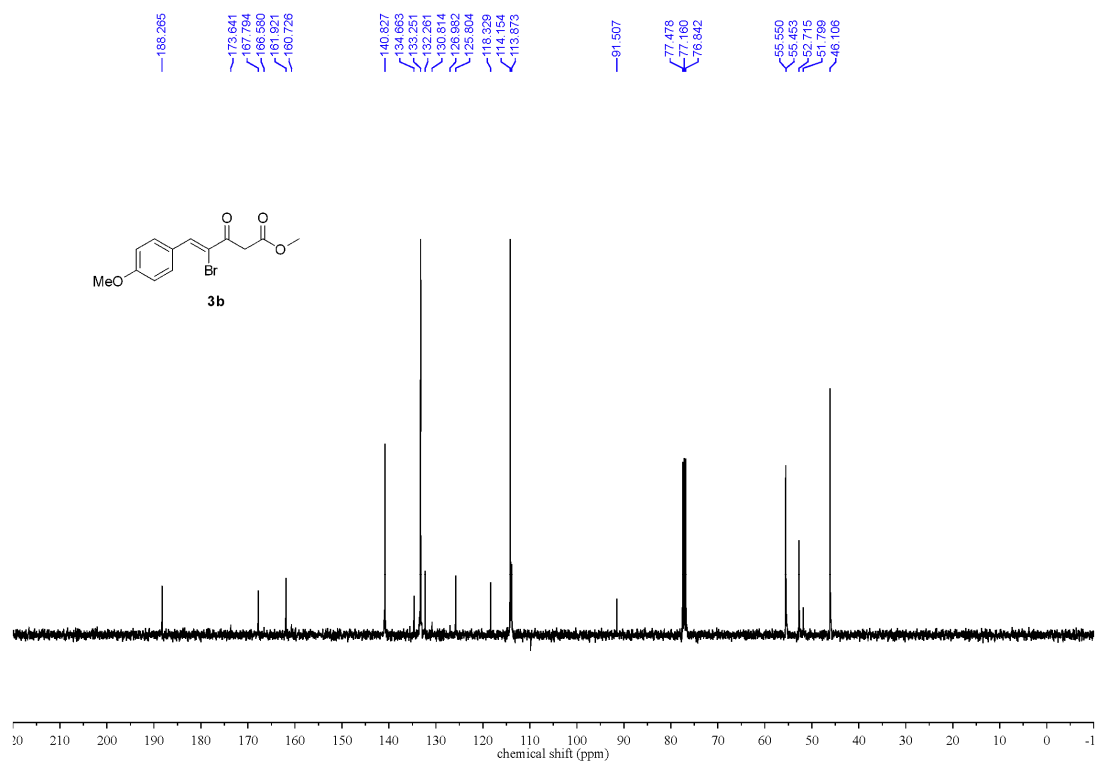

**(Z)-Methyl 4-bromo-3-oxo-5-(4-(trifluoromethyl)phenyl)pent-4-enoate (3c)**

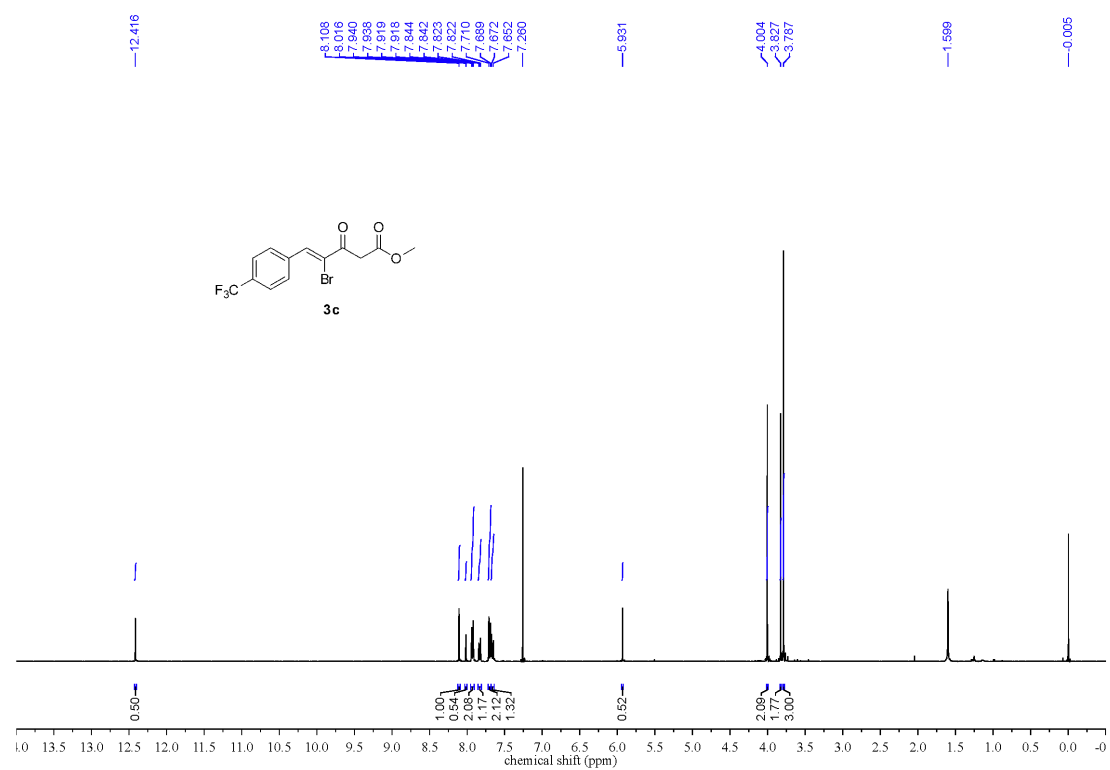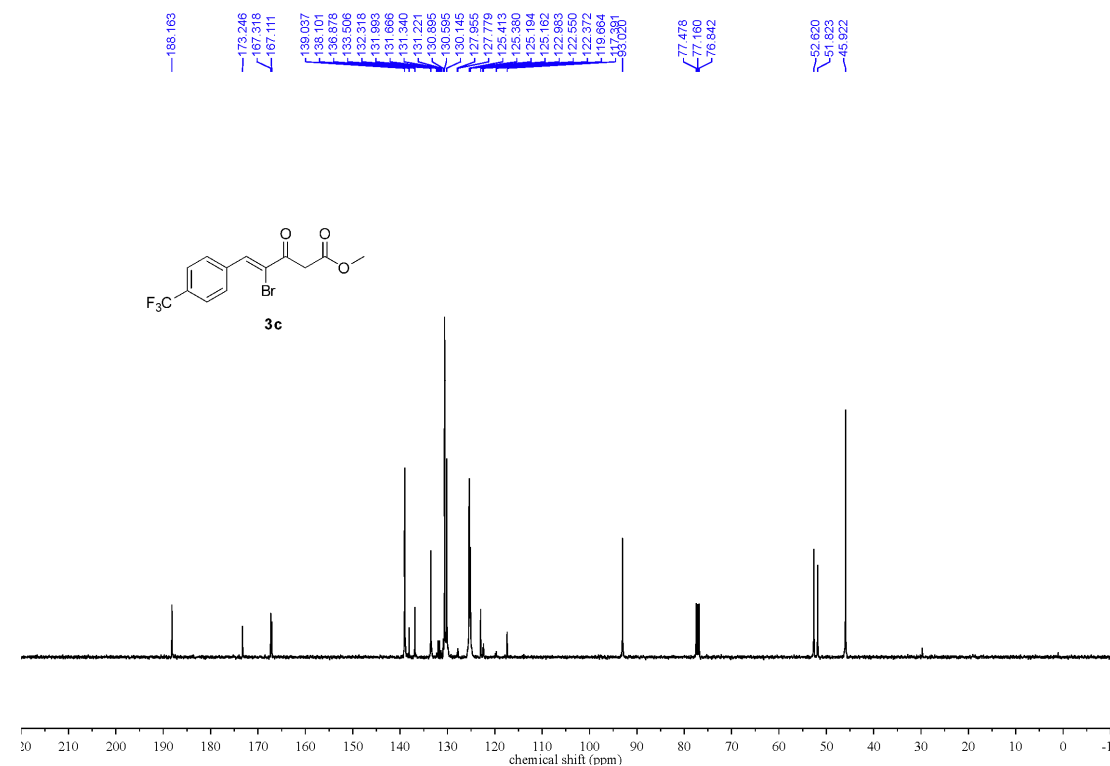

**(Z)-Methyl 4-bromo-3-hydroxy-5-phenylpent-4-enoate (4a)**

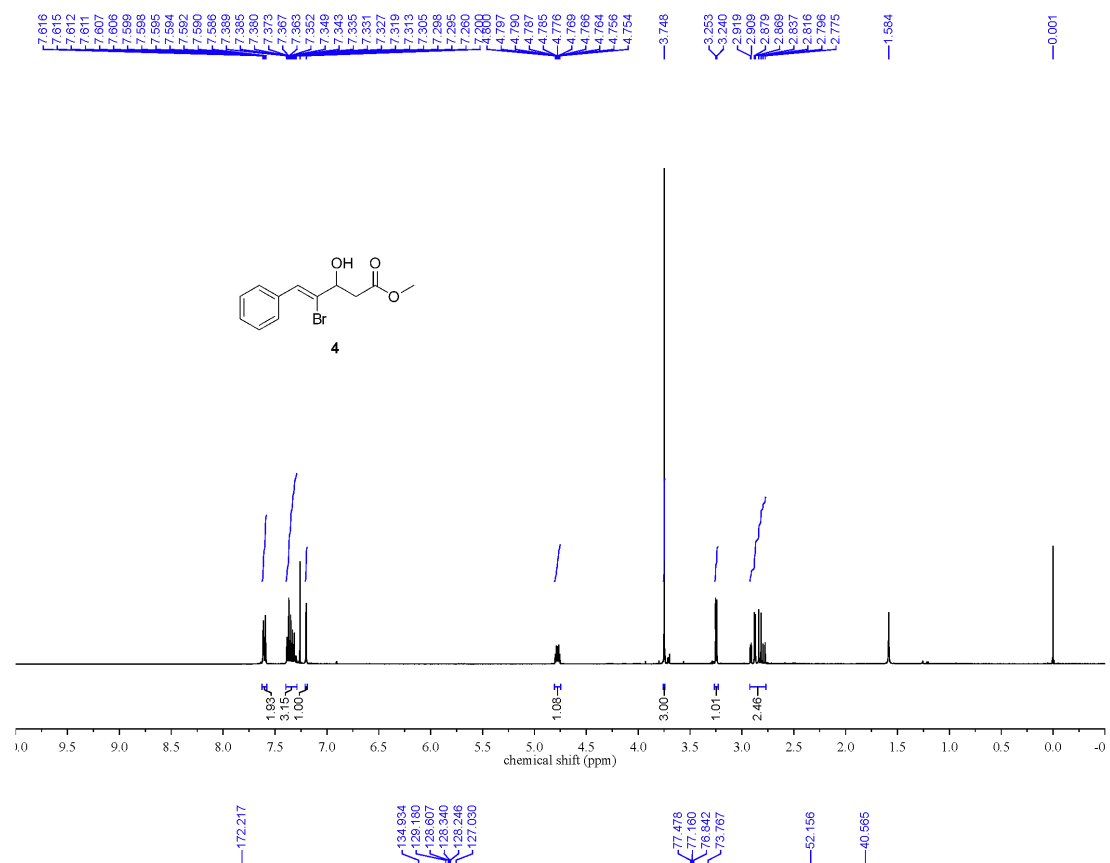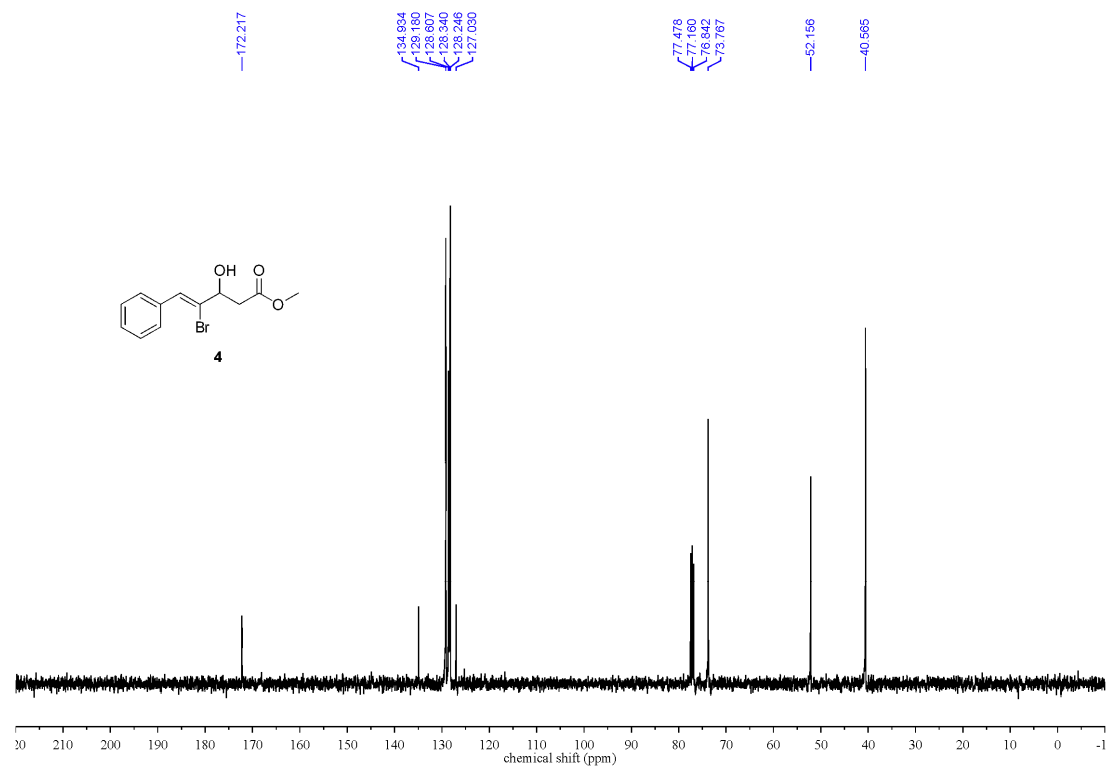

1D-NOE: irradiate on H<sub>a</sub>

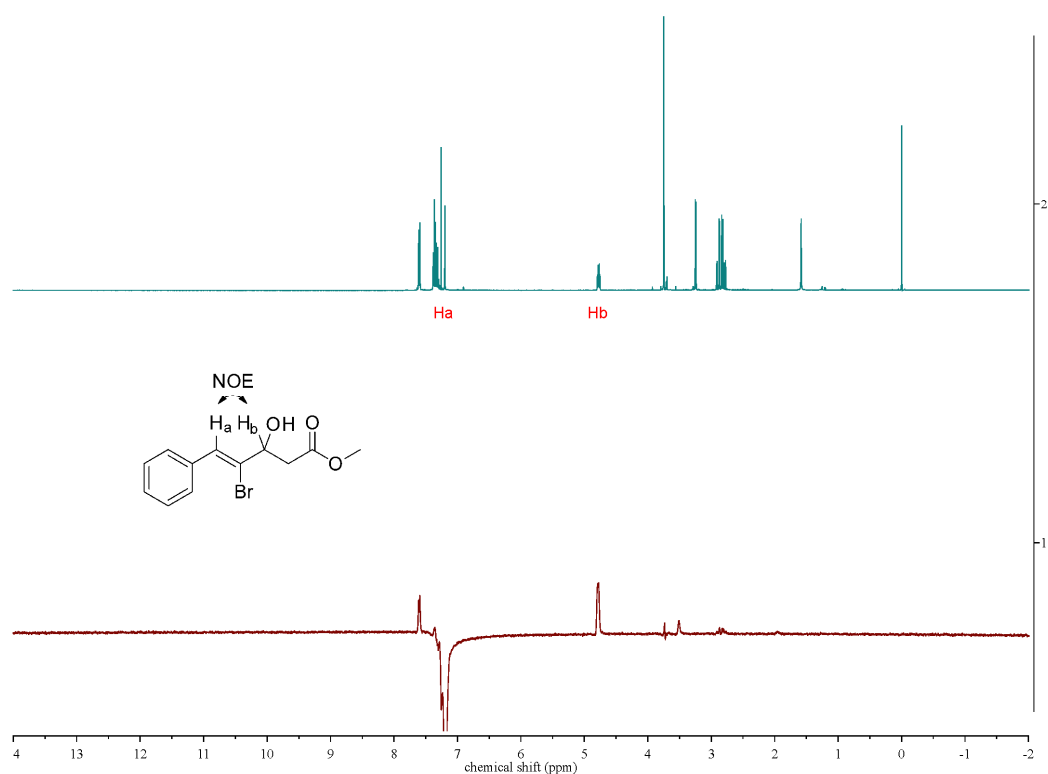

(Z)-Methyl 4-bromo-3-hydroxy-5-(4-methoxyphenyl)pent-4-enoate (4b)

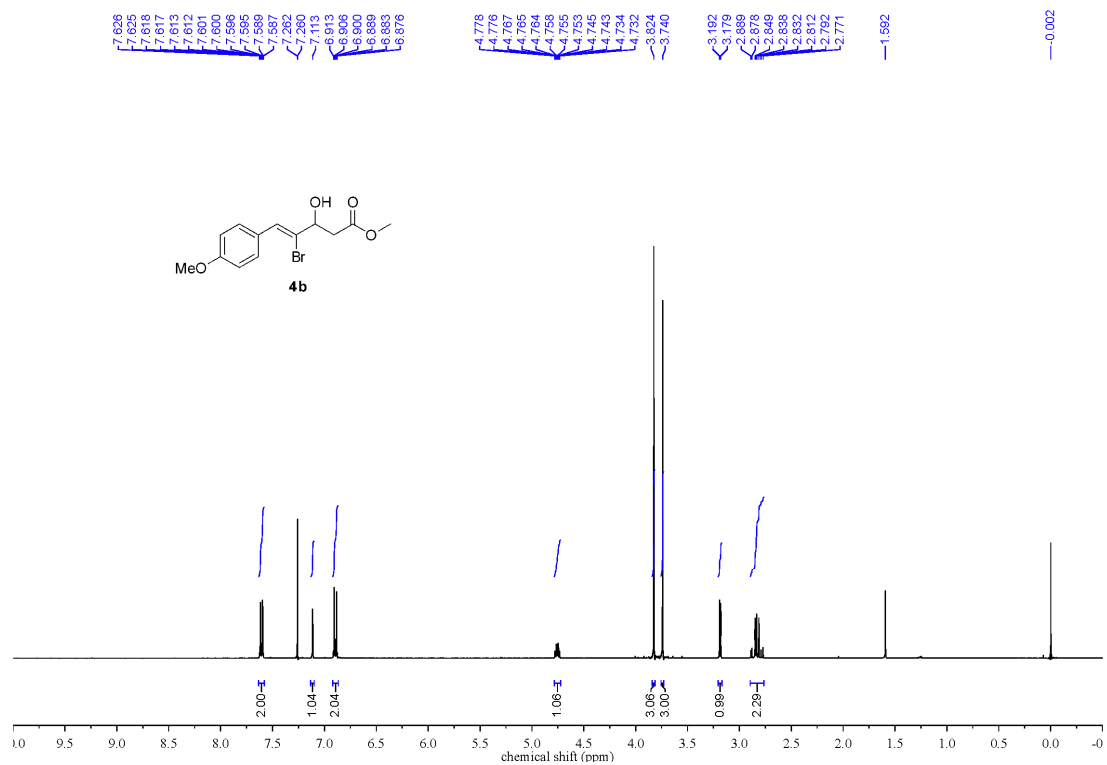



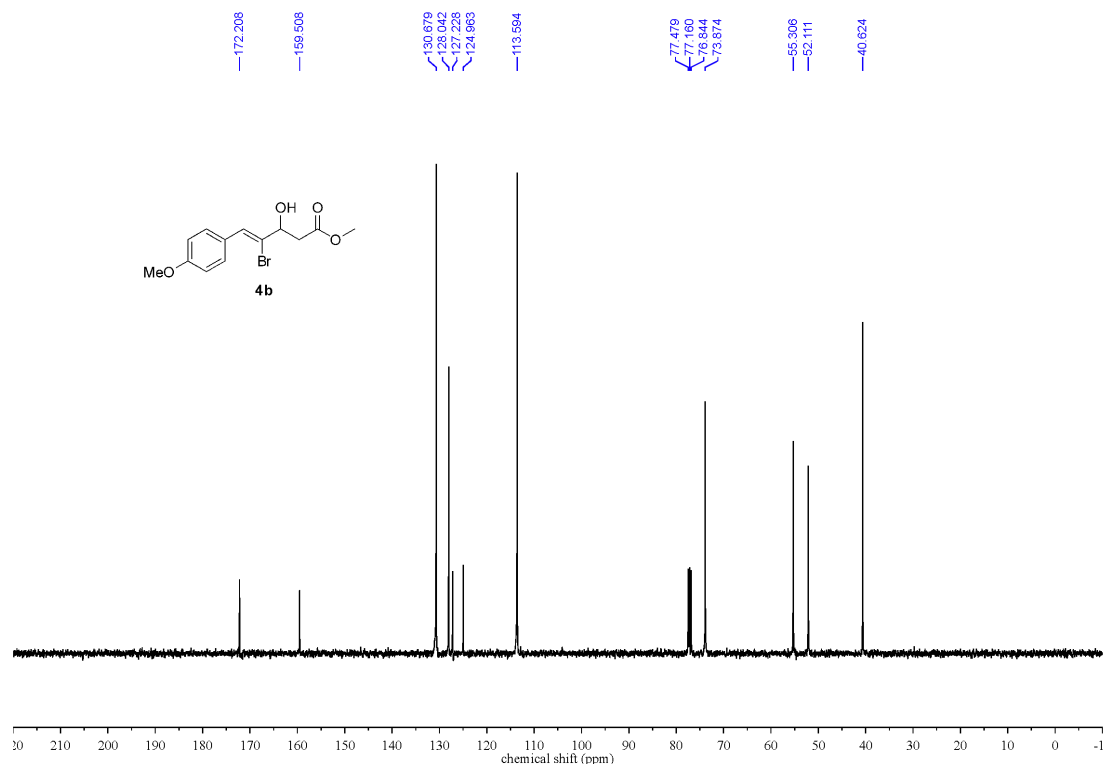

**(Z)-Methyl 4-bromo-3-hydroxy-5-(4-(trifluoromethyl)phenyl)pent-4-enoate (4c)**

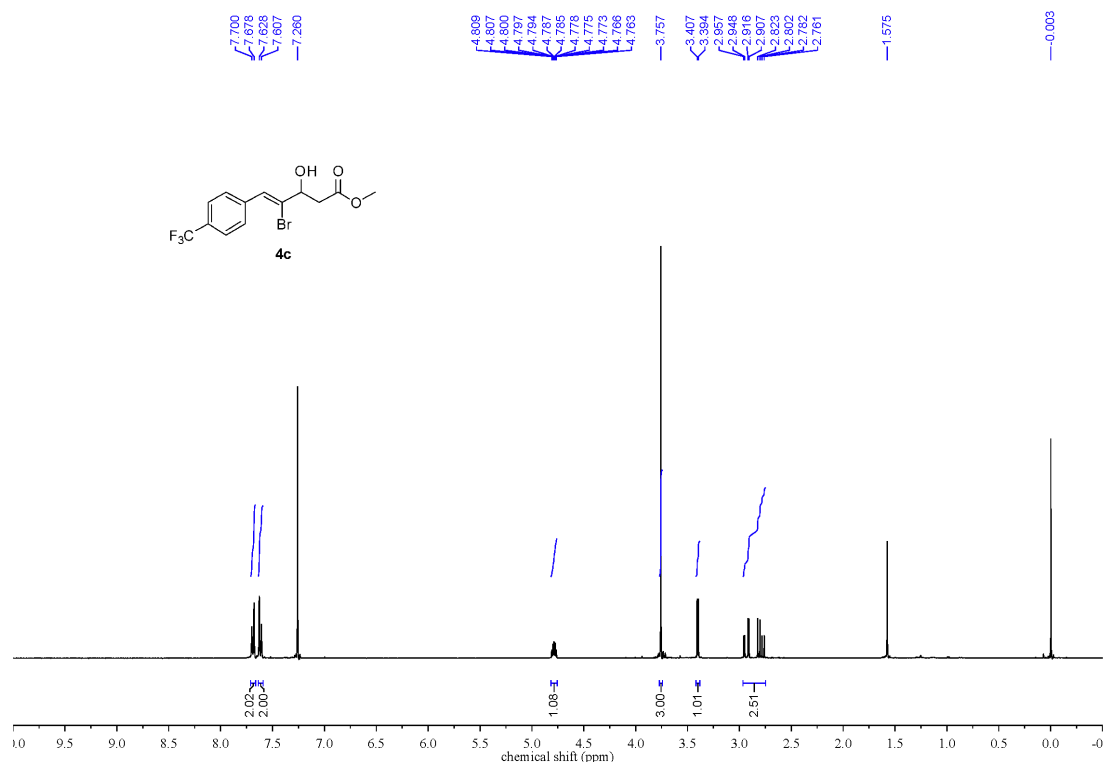

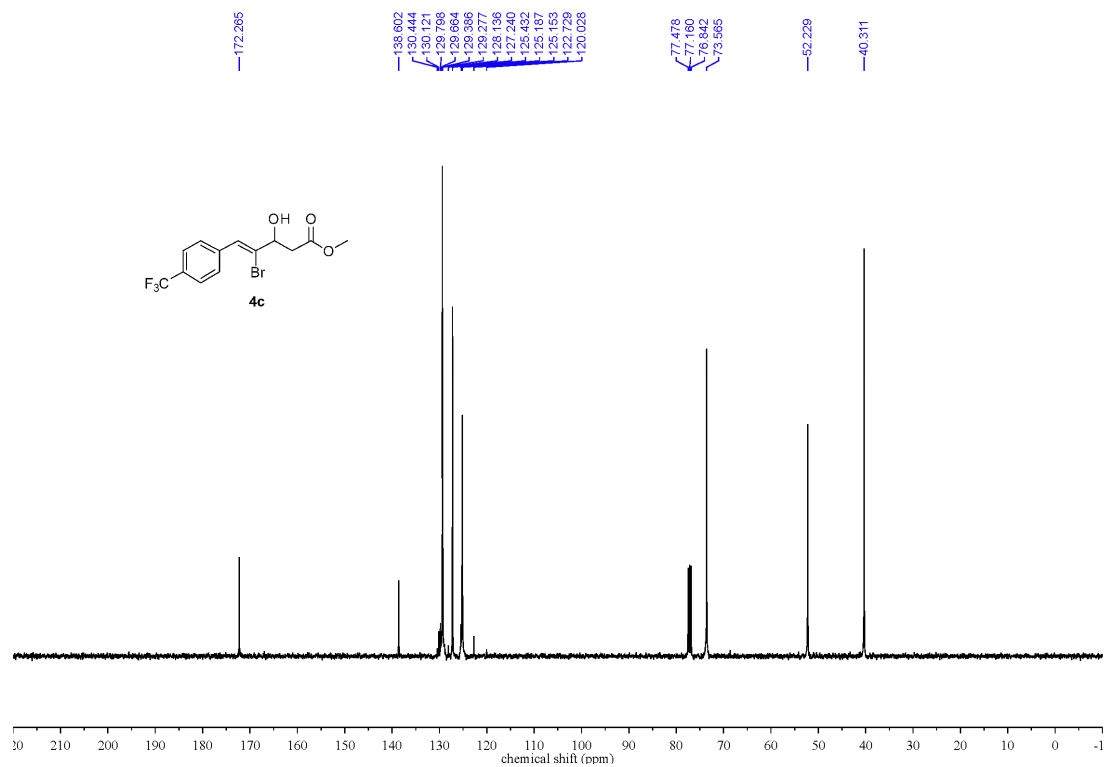

**(E)-Methyl 3-hydroxy-5-(4-methoxyphenyl)pent-4-enoate (4b')**

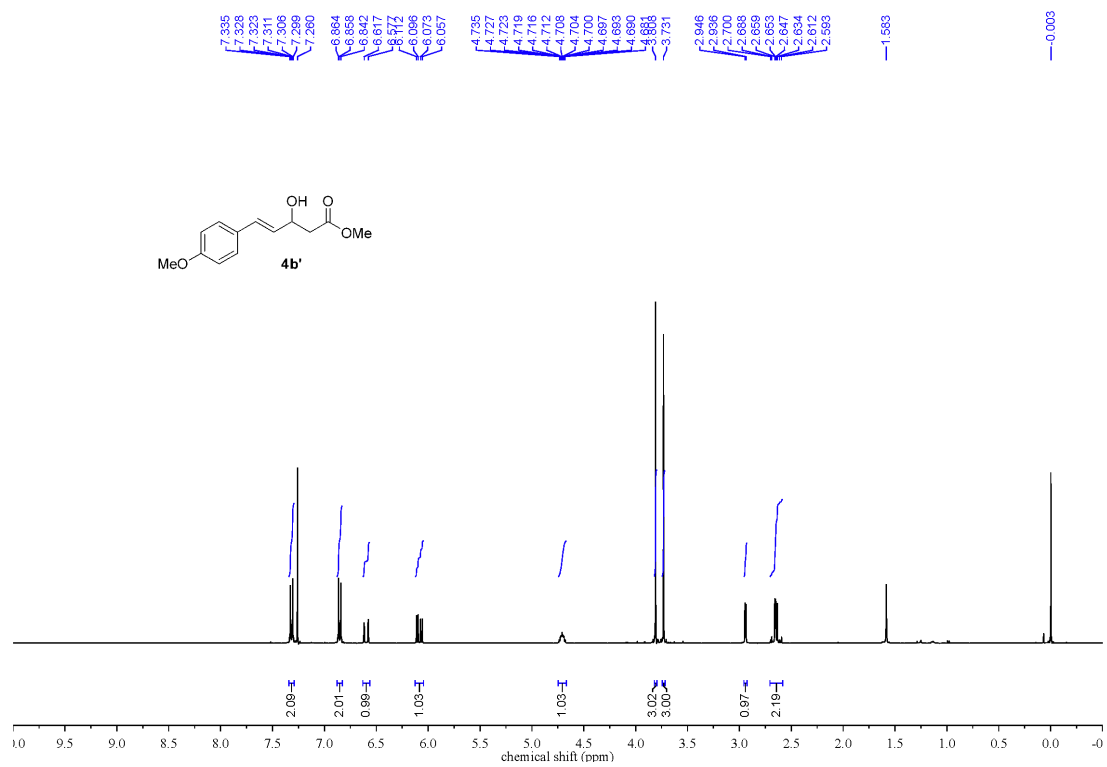

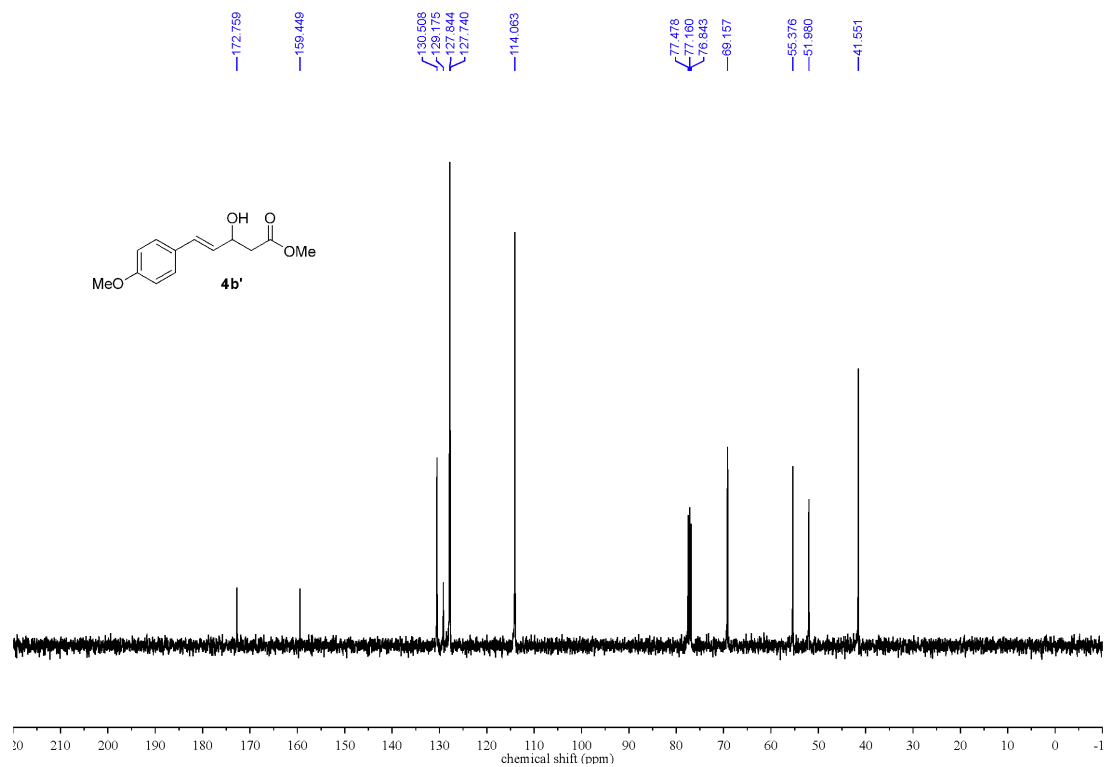

**(E)-Methyl 3-hydroxy-5-(4-(trifluoromethyl)phenyl)pent-4-enoate (4c')**

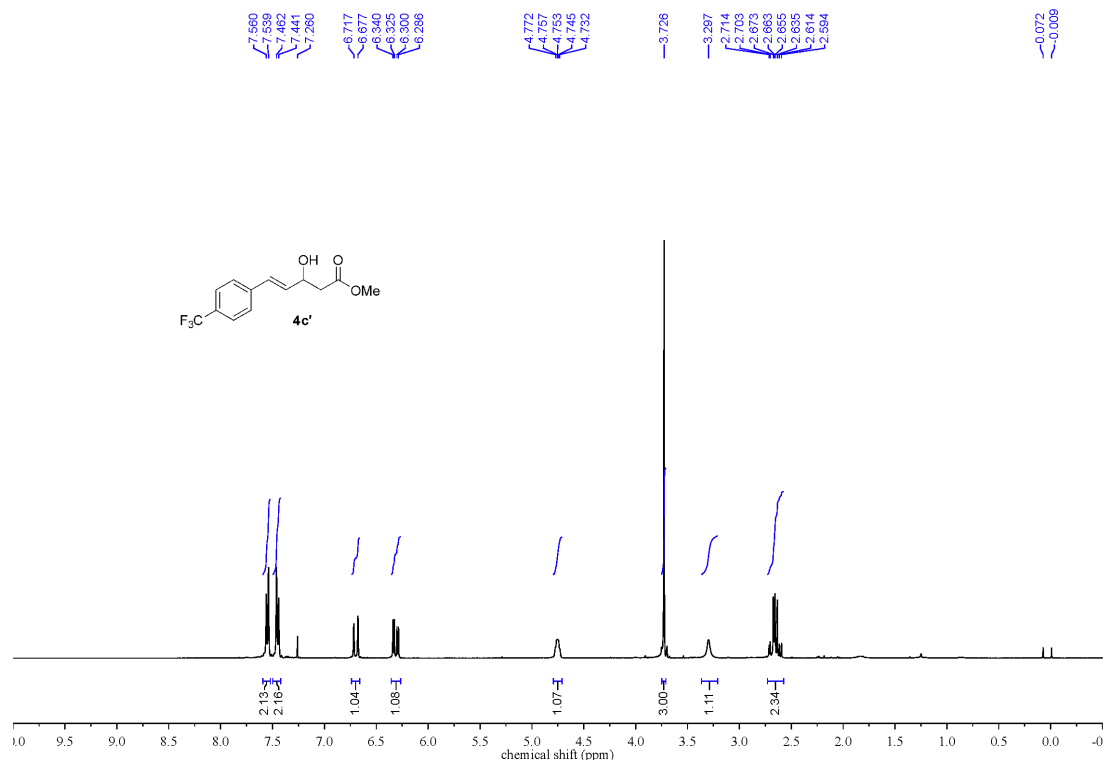

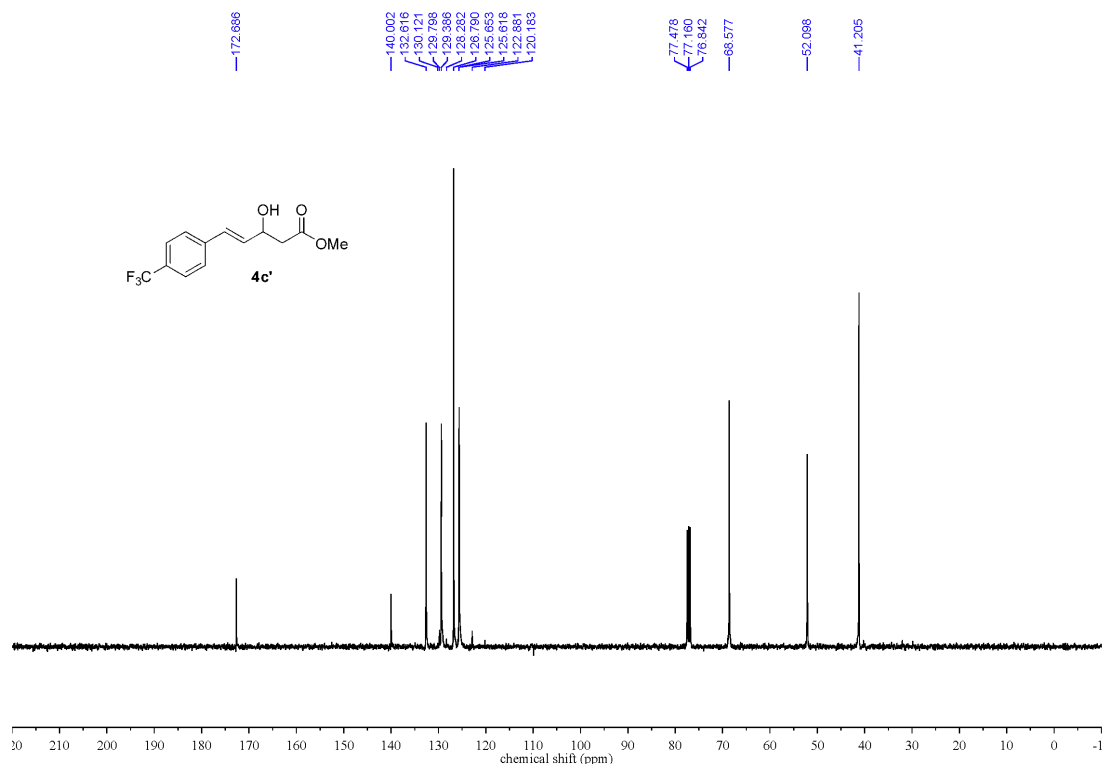

**(Z)-Methyl 2-chloro-3-(2-methoxyphenyl)acrylate (Z-5e)**

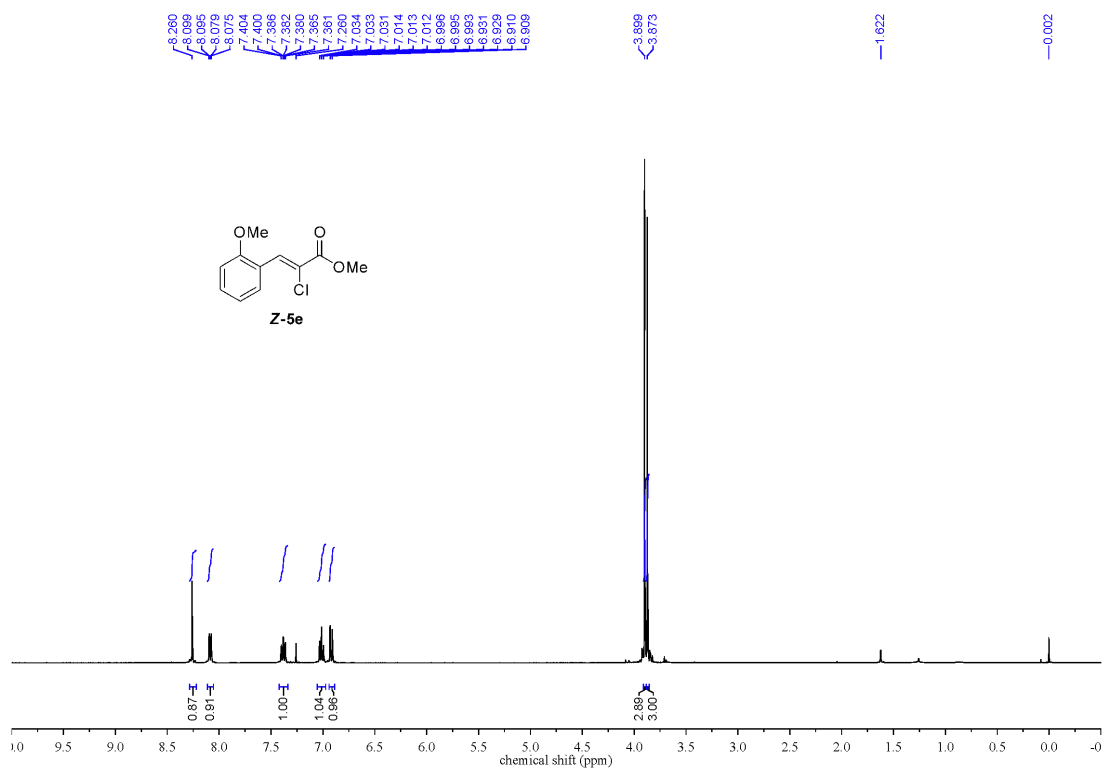

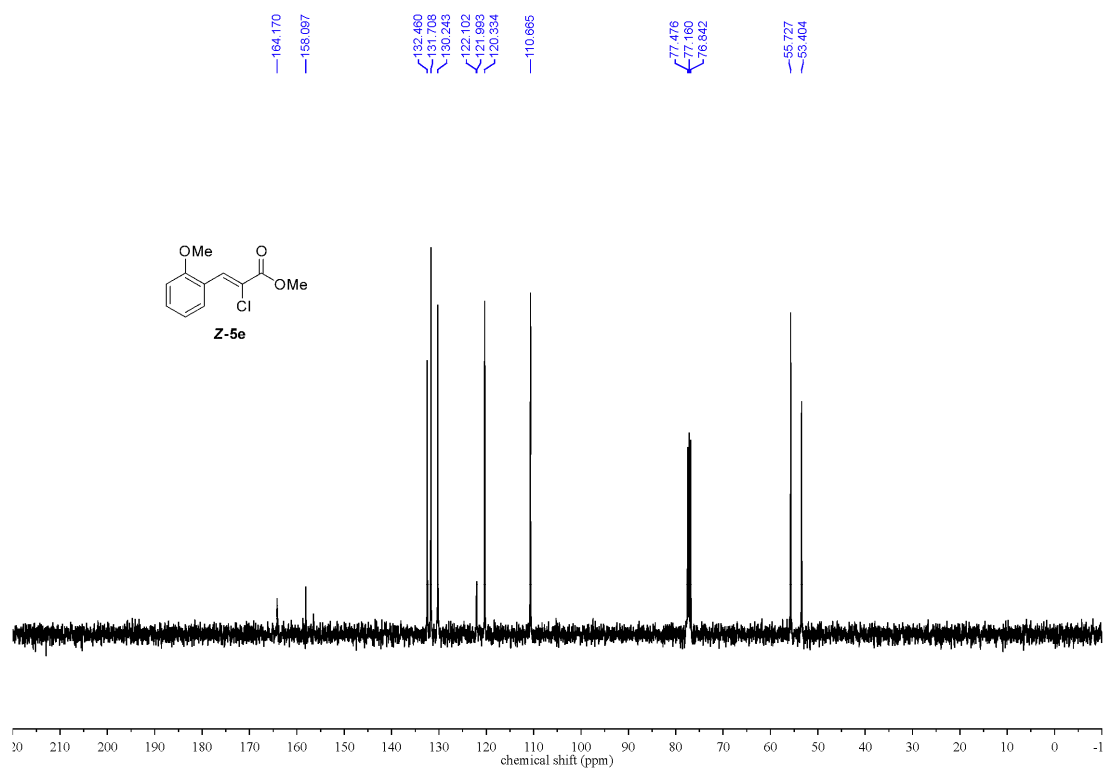

**(E)-Methyl 2-chloro-3-(2-methoxyphenyl)acrylate (E-5e)**

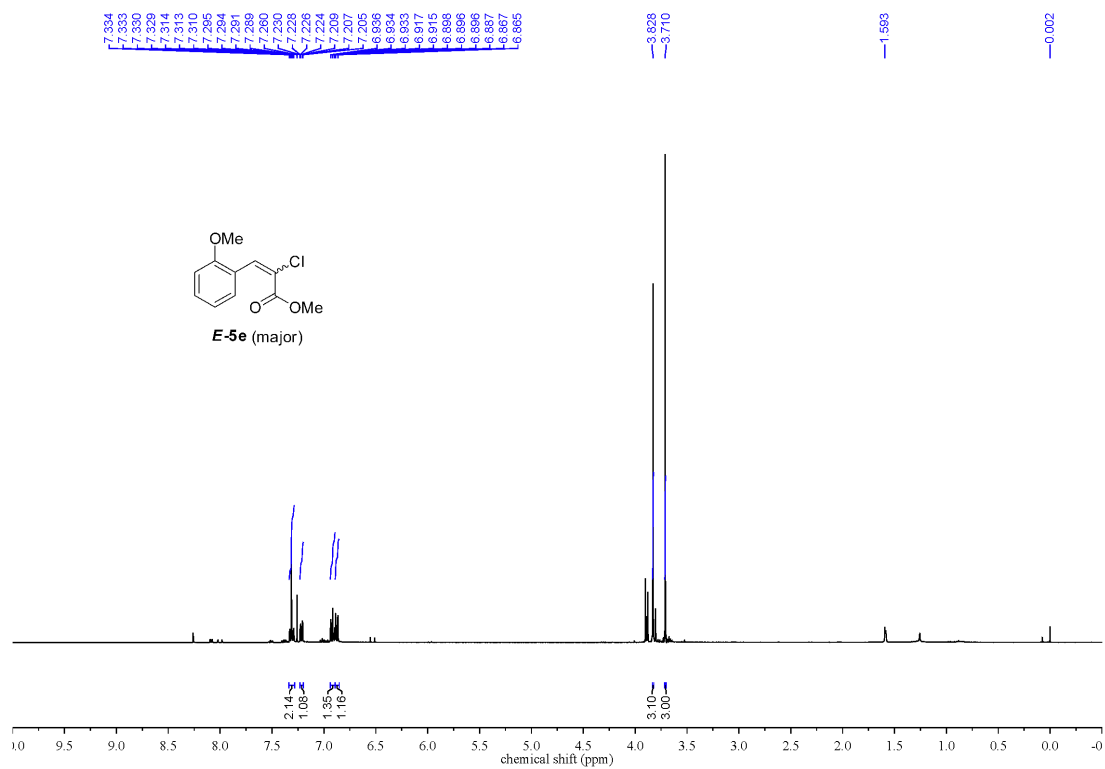

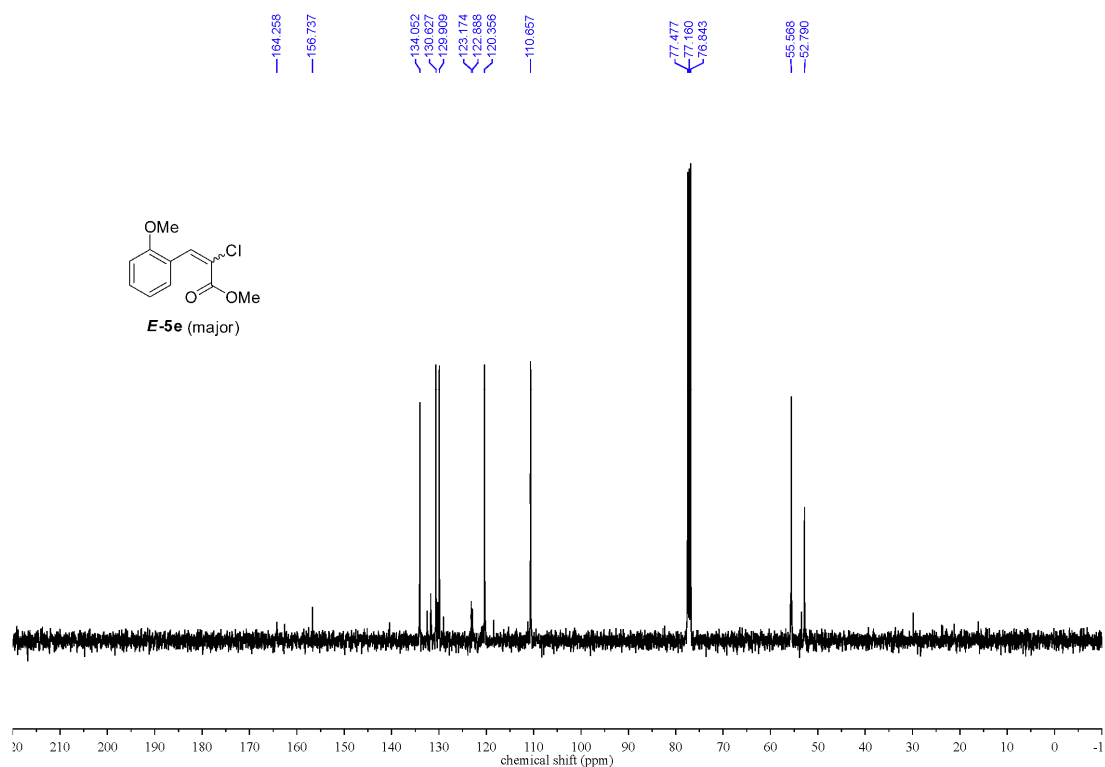

**(Z)-Methyl 2-chloro-3-(3-chlorophenyl)acrylate (Z-5g)**

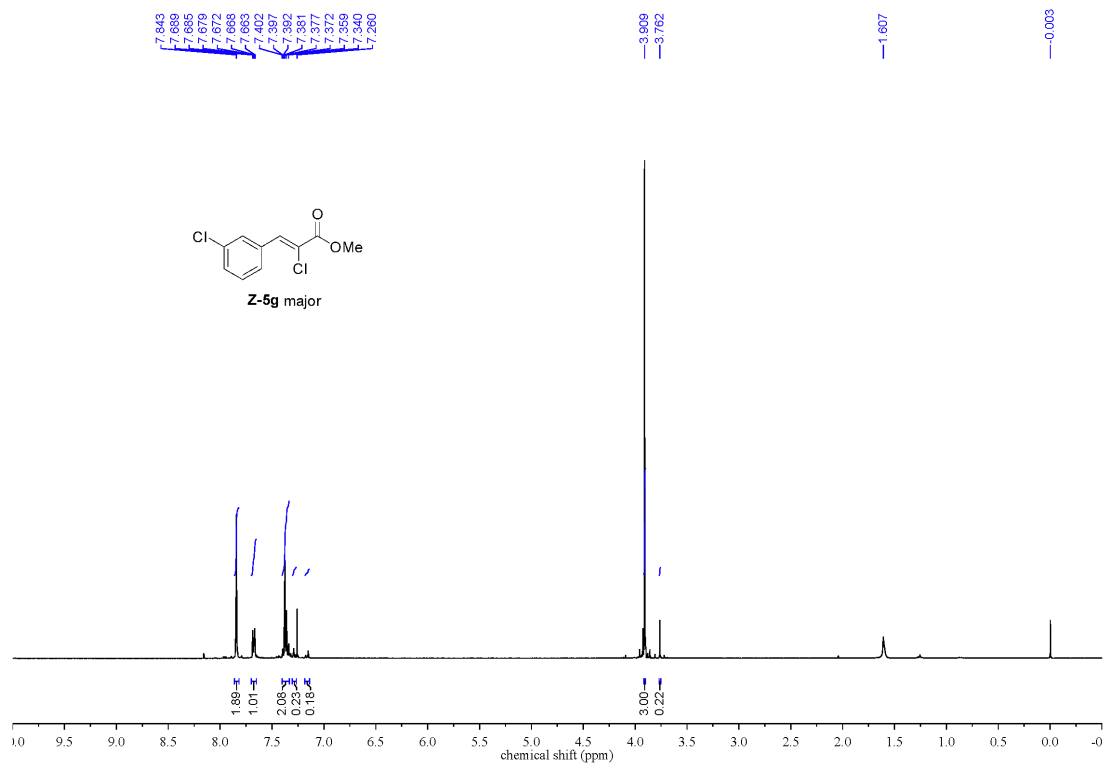

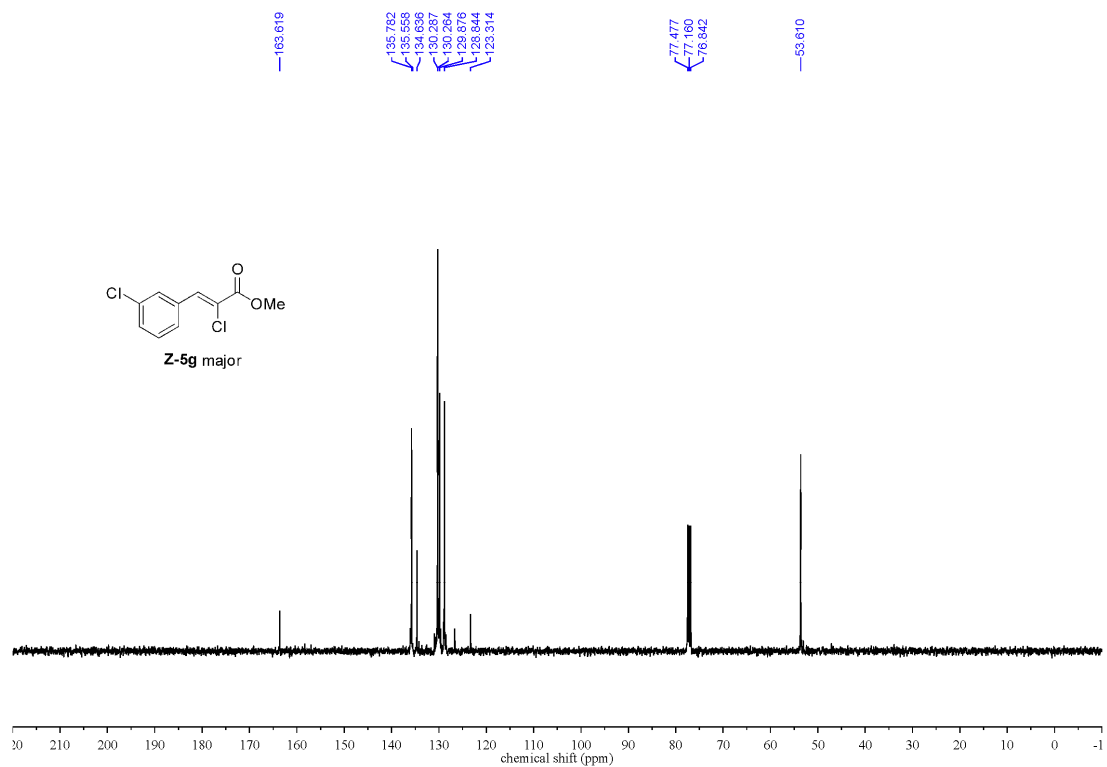

**(Z)-Methyl 3-(4-bromophenyl)-2-chloroacrylate (Z-5j)**

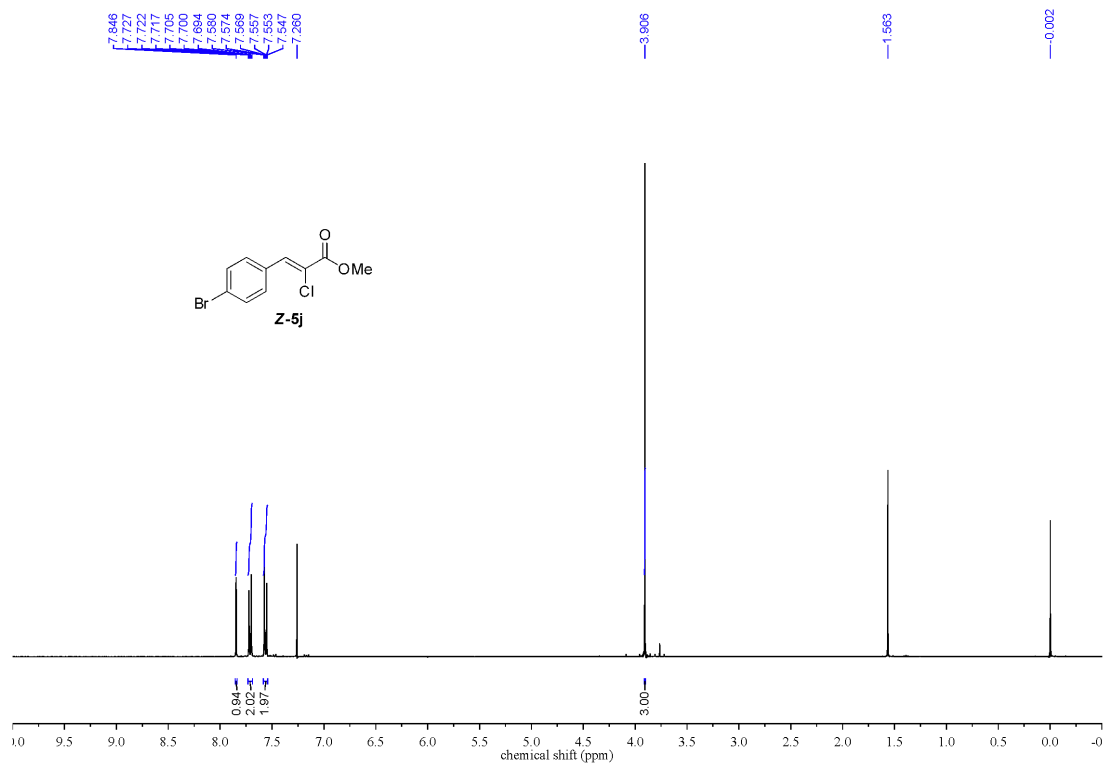

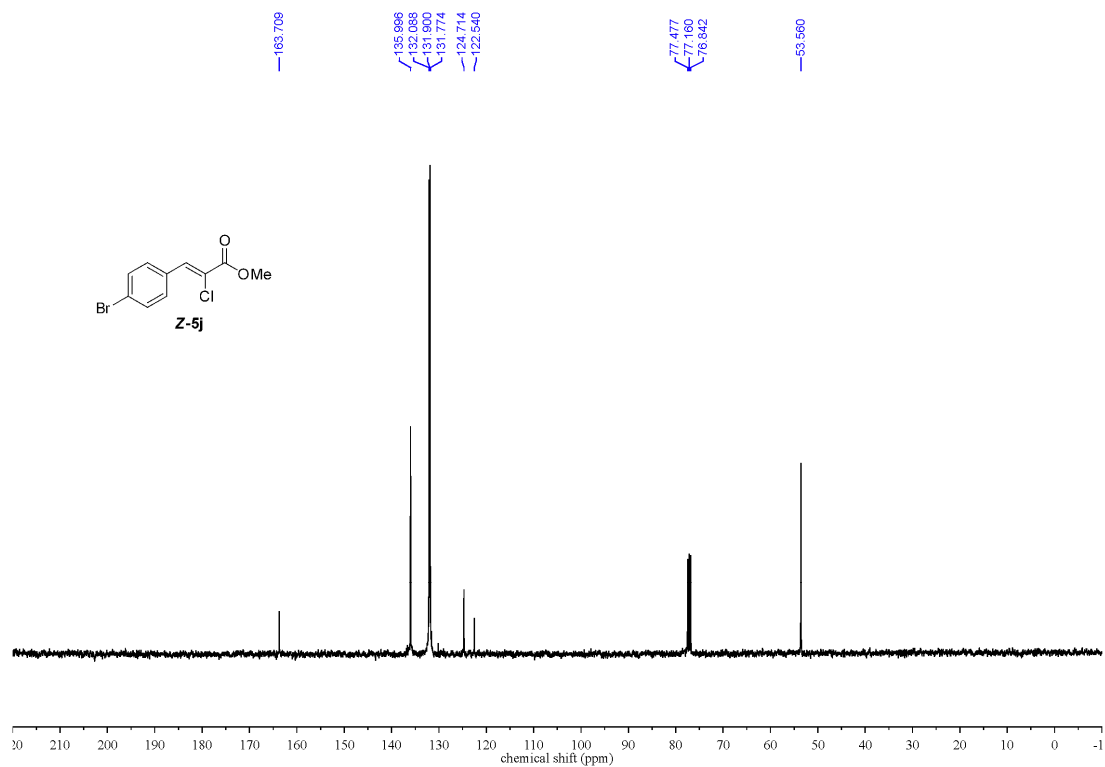

**(E)-Methyl 3-(4-bromophenyl)-2-chloroacrylate (E-5j)**

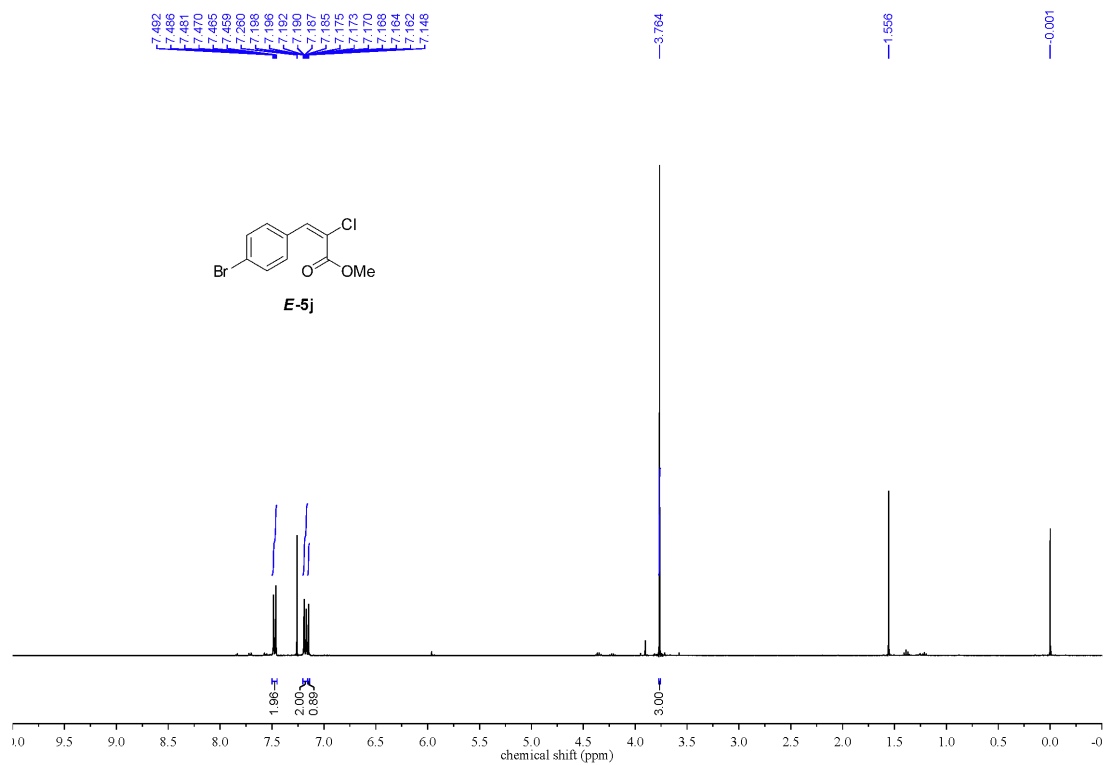



In CDCl<sub>3</sub>

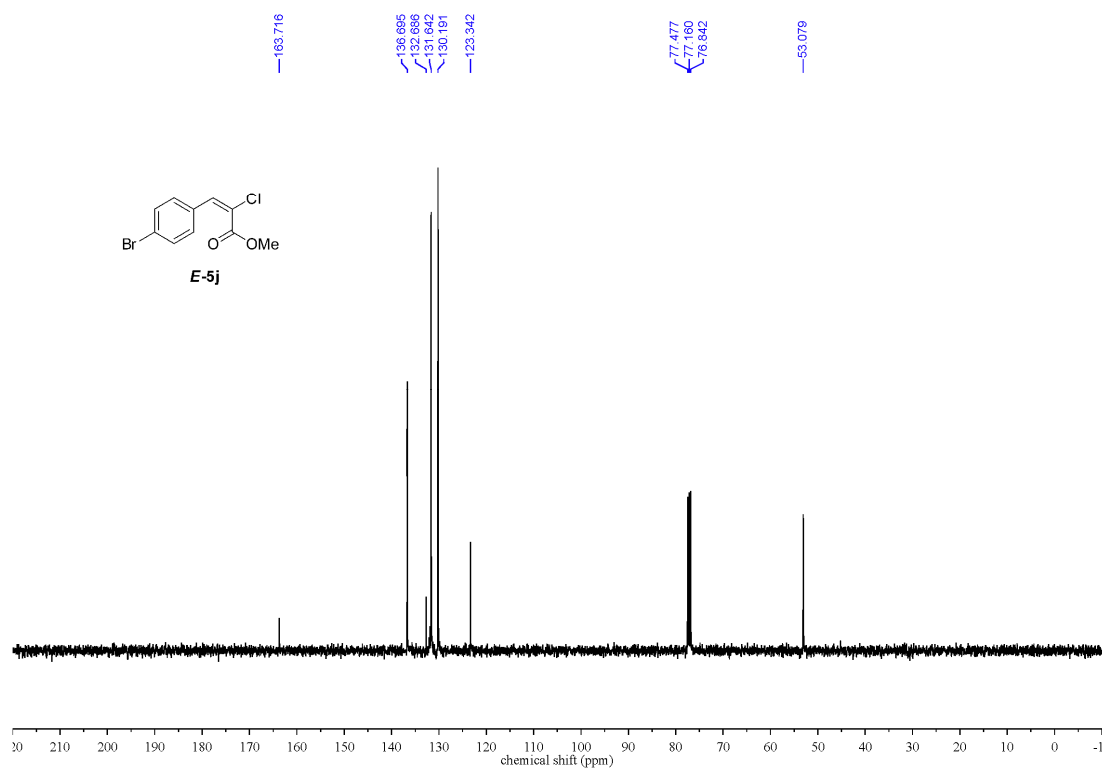

In acetone-*d*<sub>6</sub>

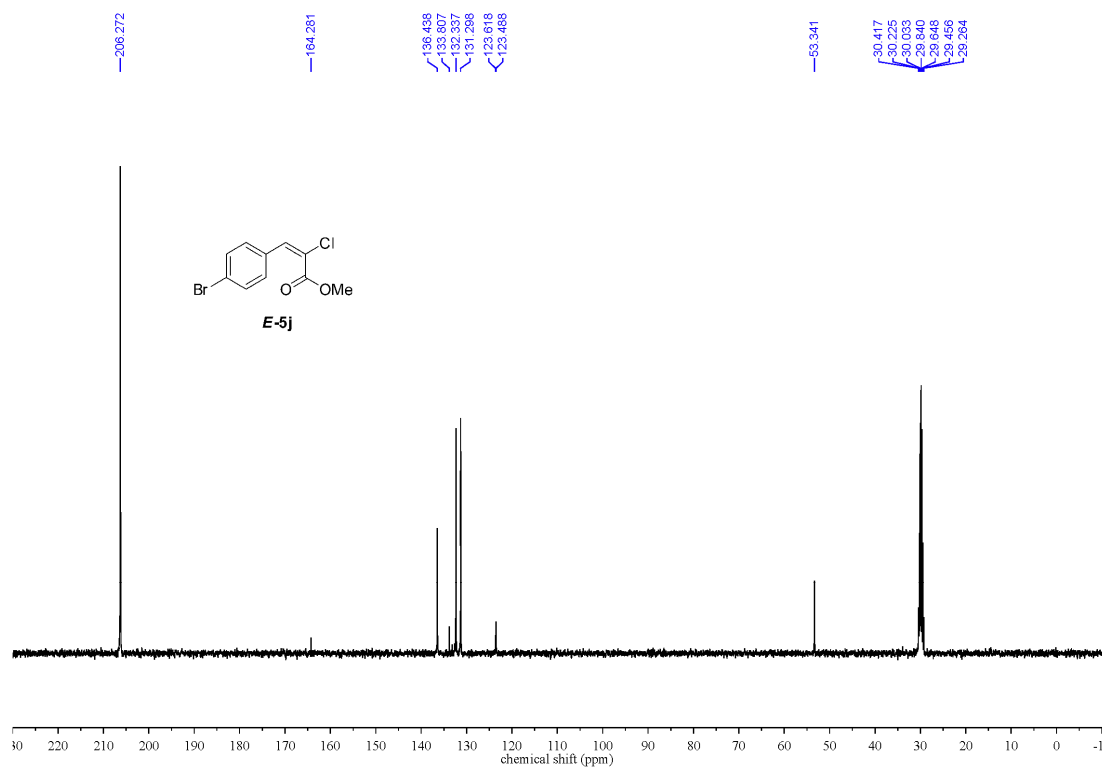

(Z)-2-Chloro-3-(3-methoxyphenyl)acrylic acid (6d)

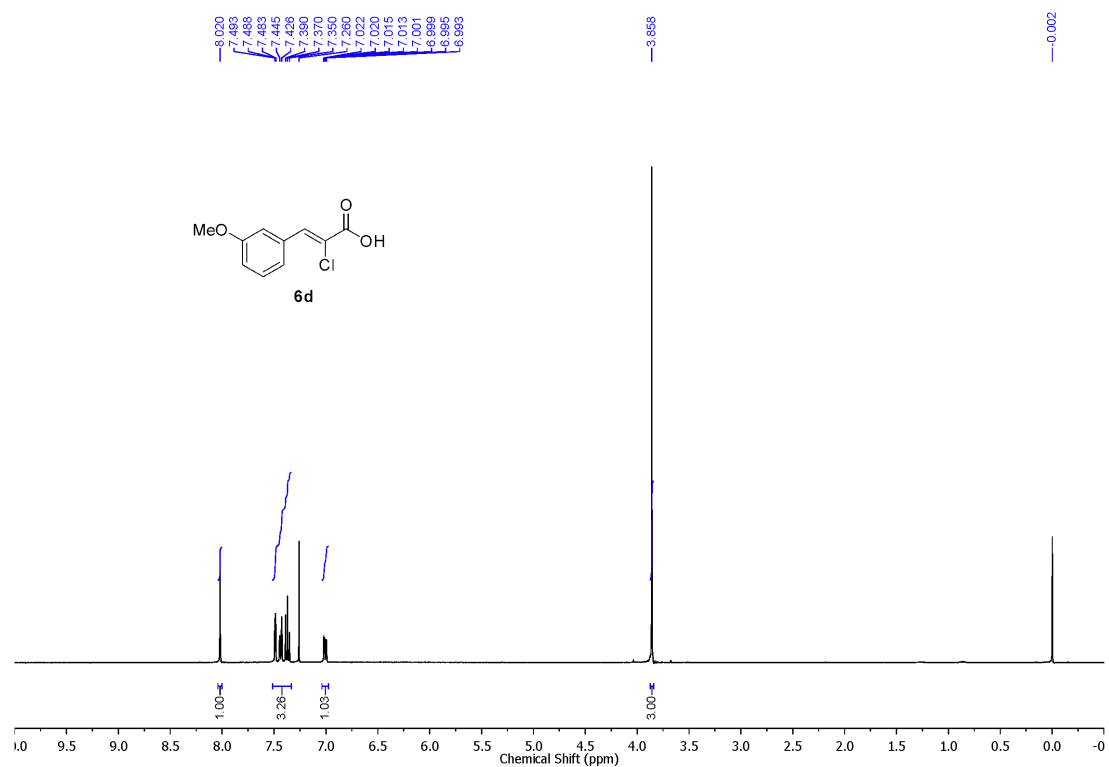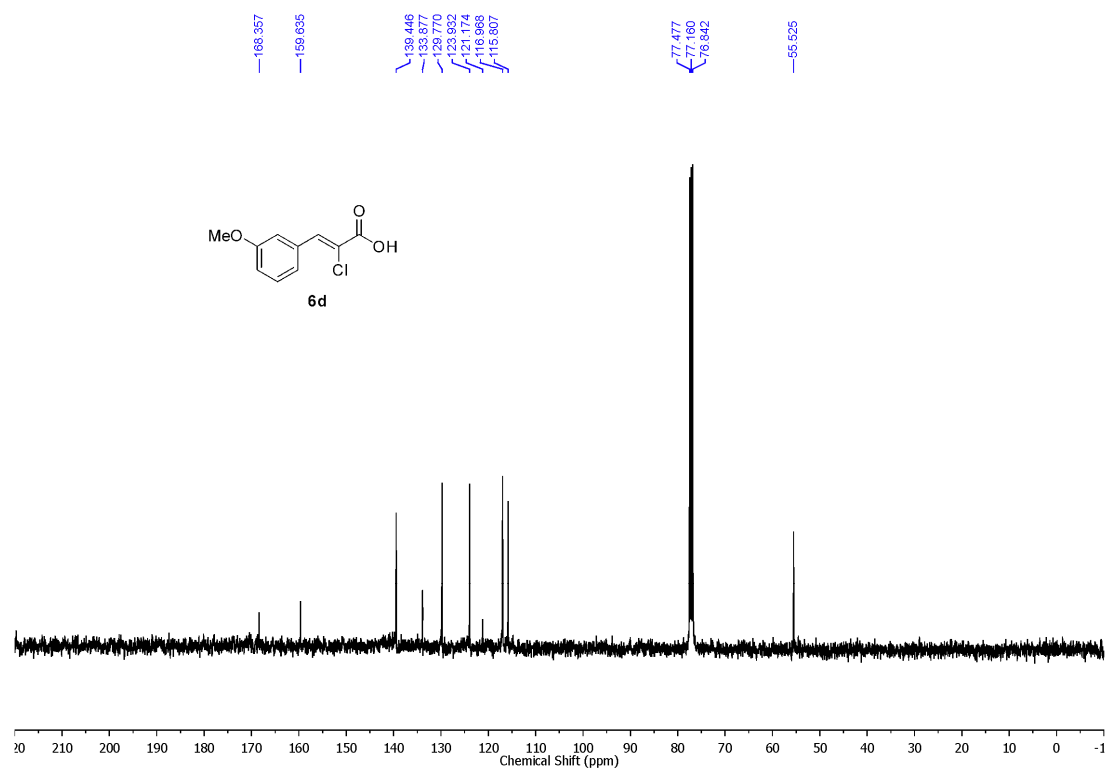

**(Z)-2-Chloro-3-(4-fluorophenyl)acrylic acid (6i)**

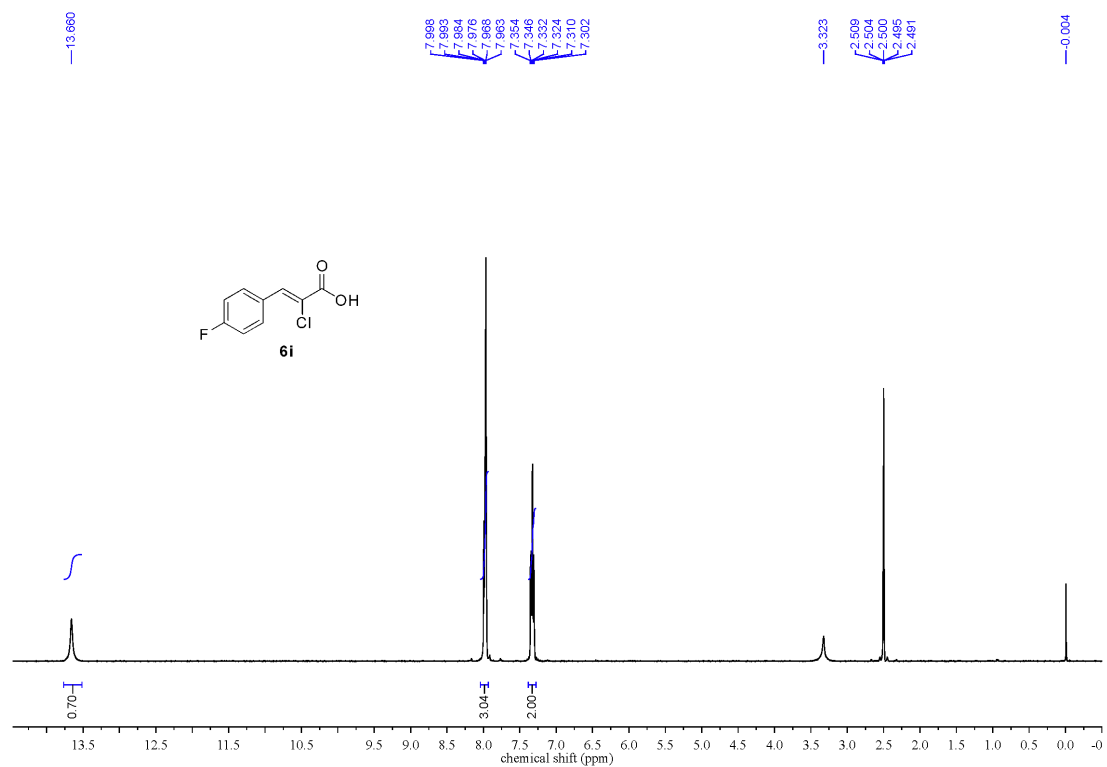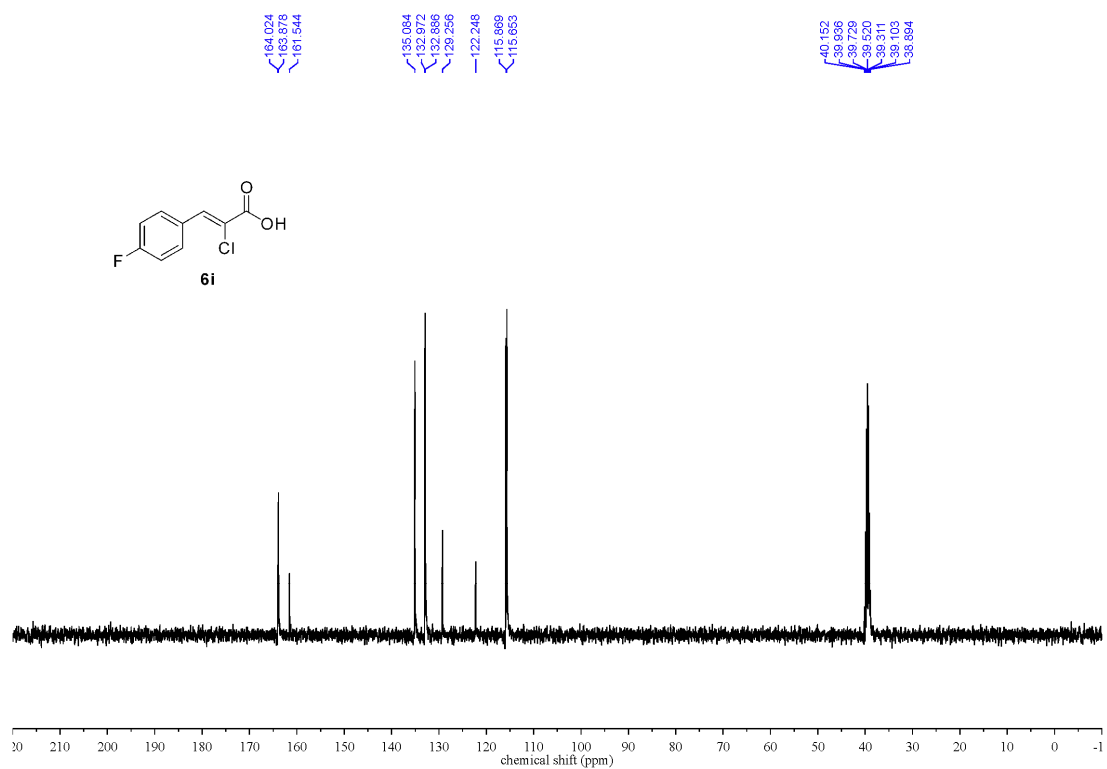

(Z)-2-Chloro-3-(4-(trifluoromethyl)phenyl)acrylic acid (6k)

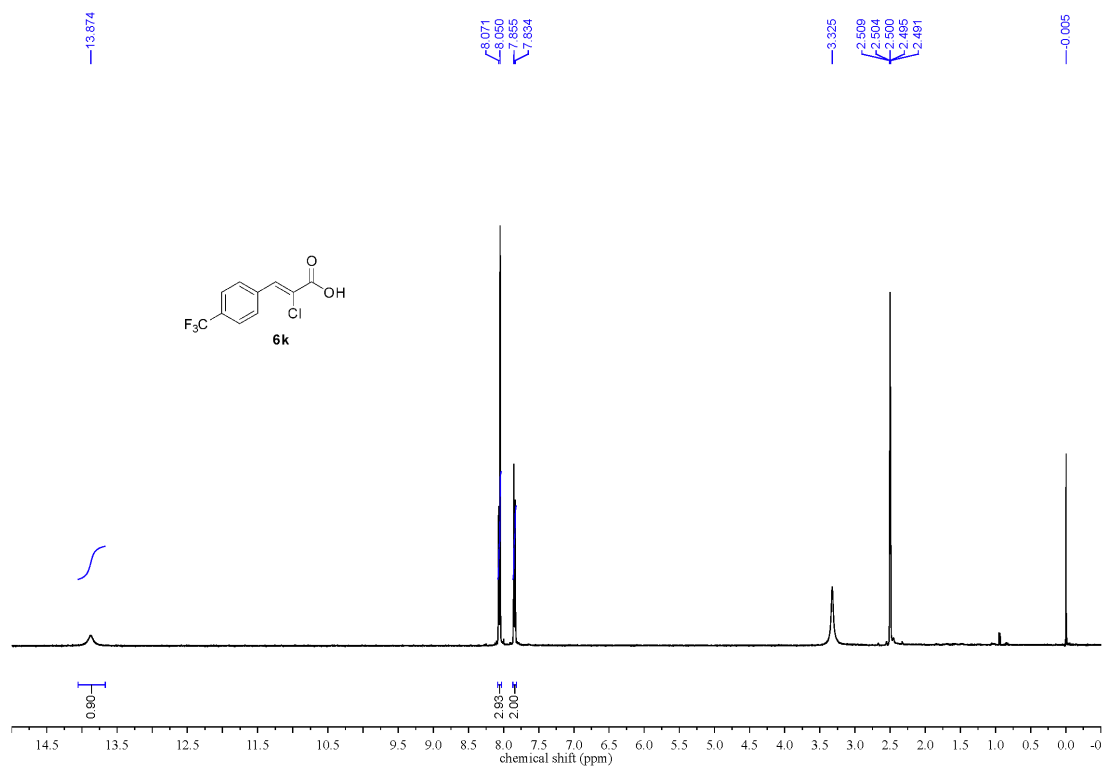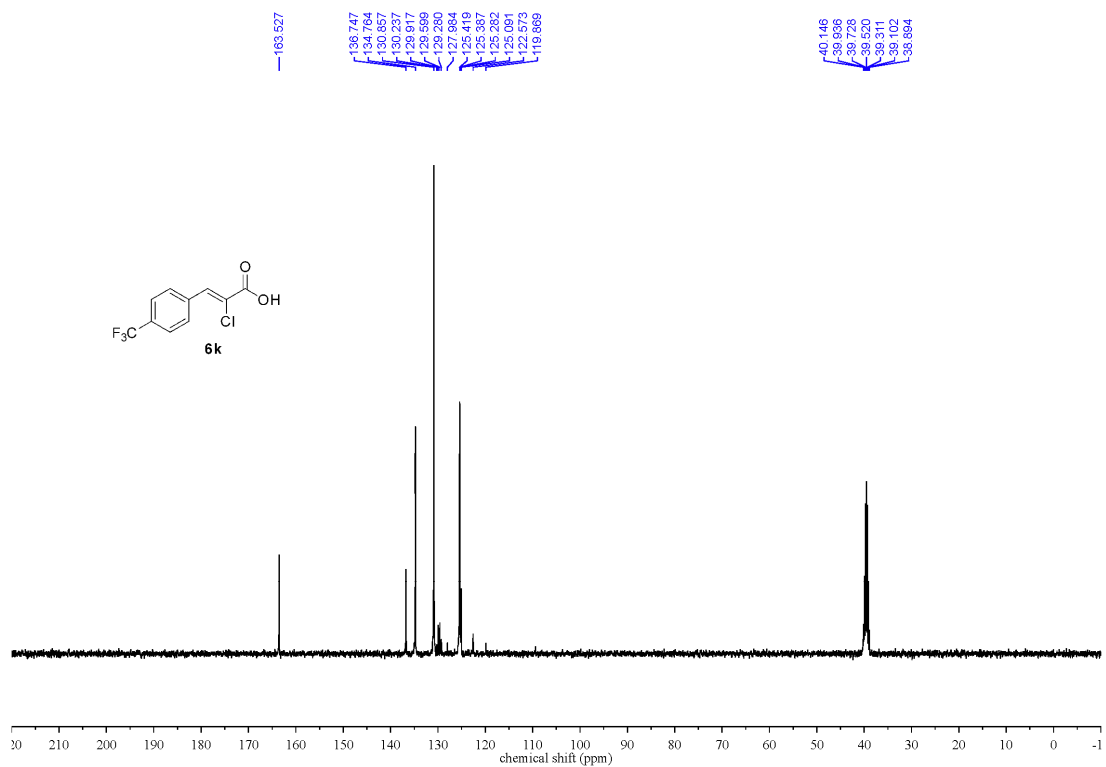

### Ethyl 2,3-dibromo-3-(4-(trifluoromethyl)phenyl)propanoate (7c)

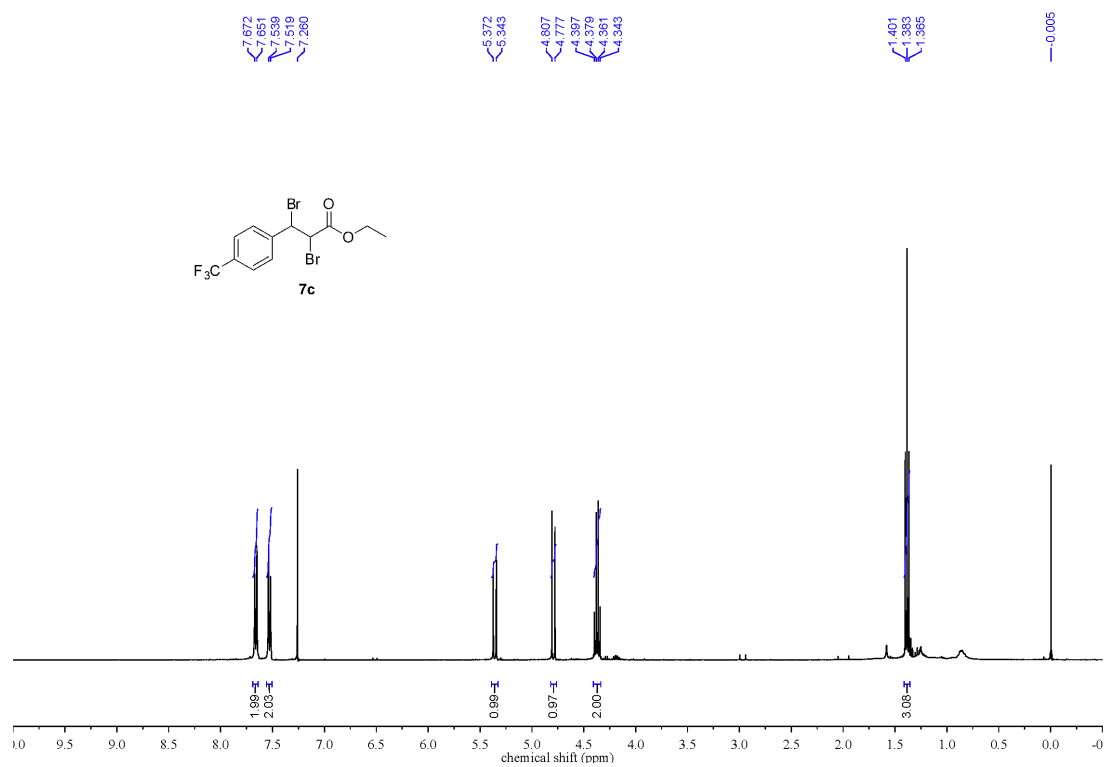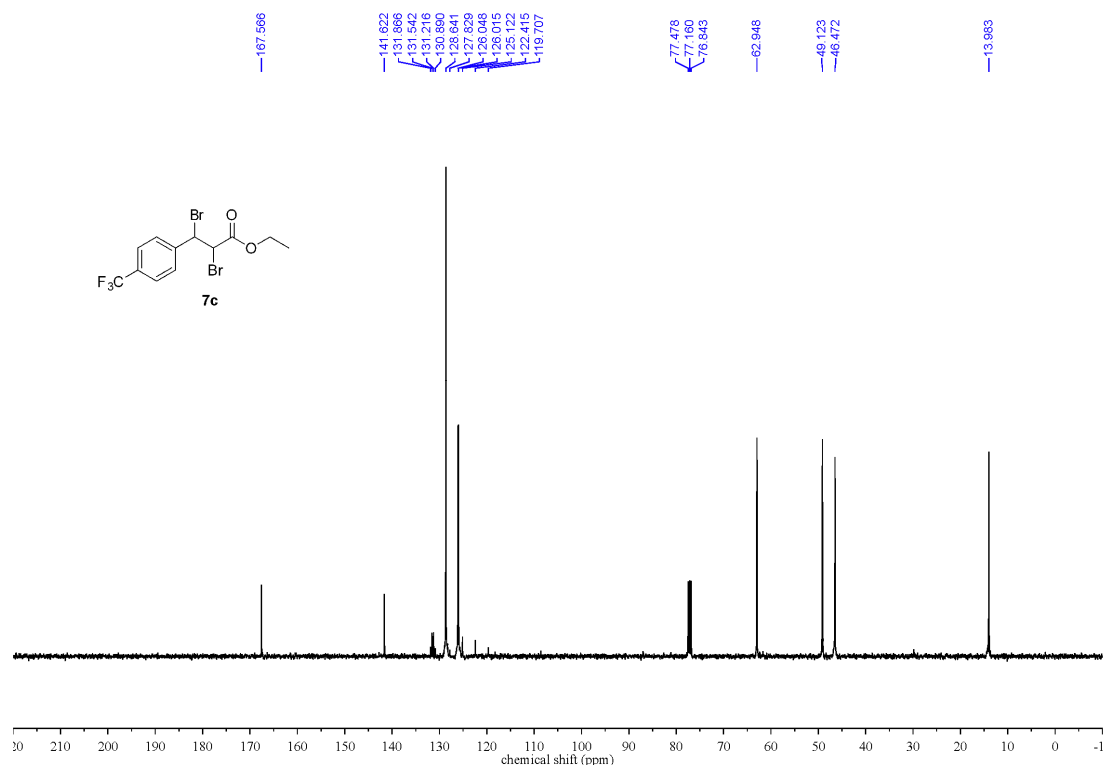

**(Z)-Methyl 2-bromo-3-(4-(trifluoromethyl)phenyl)acrylate (8c)**

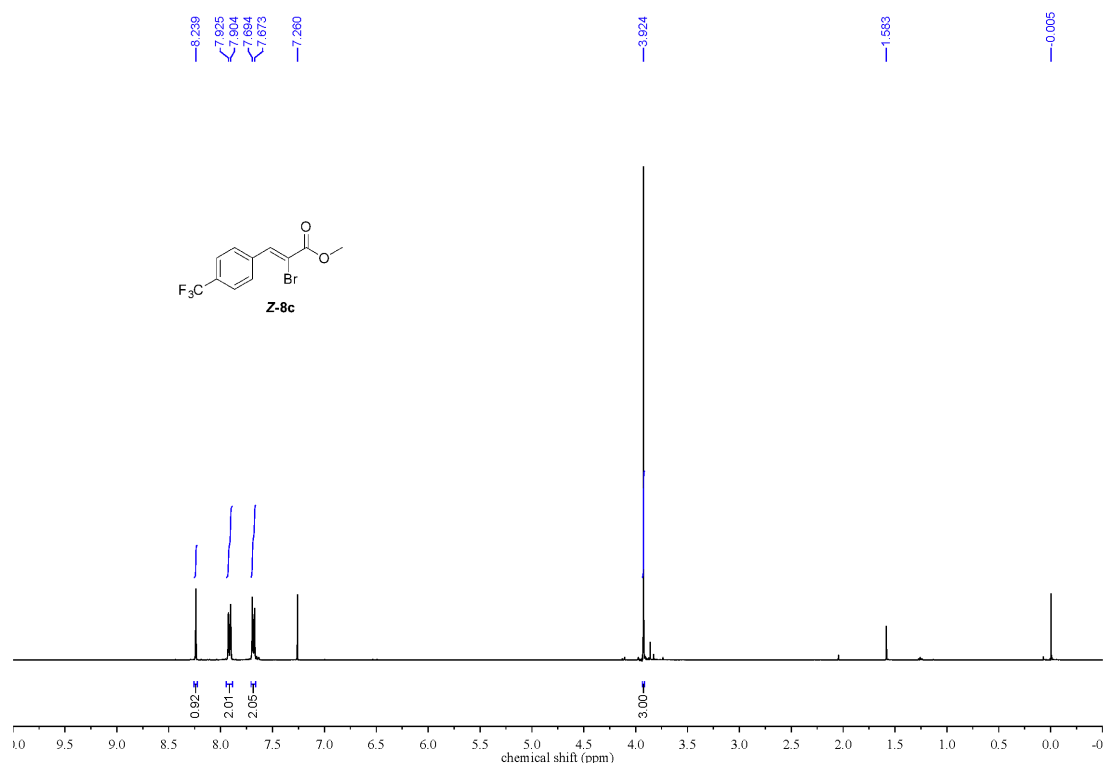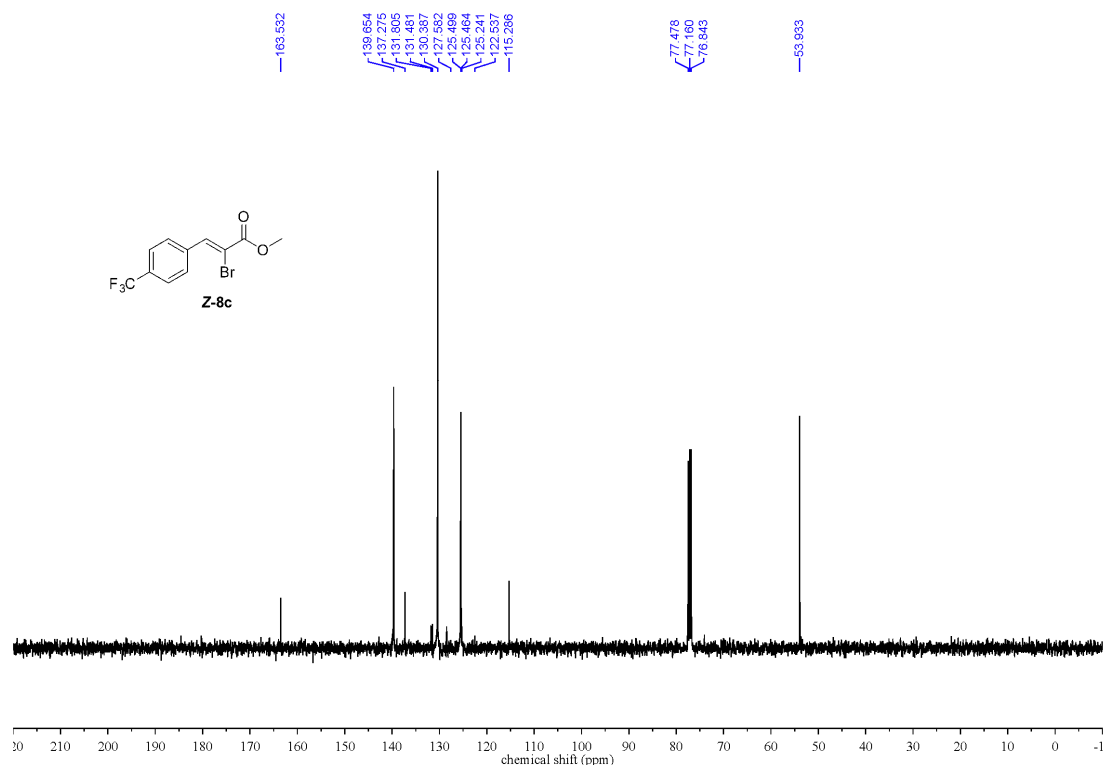

### HPLC copies of 2a-n and 4a-c, 4a'-c'

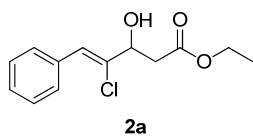

Racemate (Chiralpak IC-3 column, hexane/*i*-PrOH 95/5, 1.0 mL min<sup>-1</sup>, 254 nm)

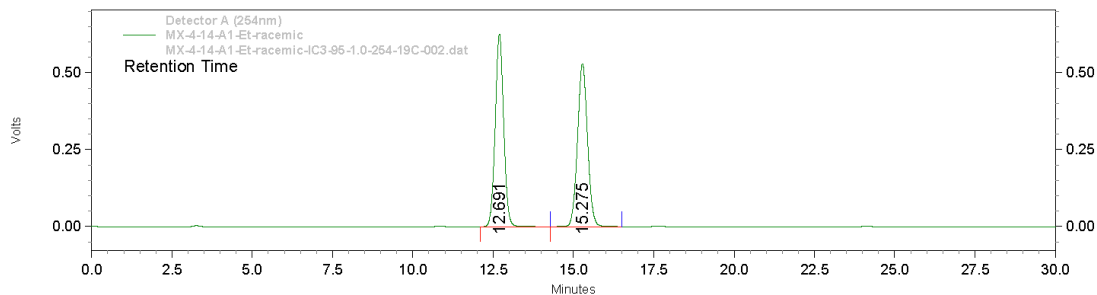

#### Detector A (254nm)

| PK #   | Retention Time | Area     | Area %  | Height  | Height % |
|--------|----------------|----------|---------|---------|----------|
| 1      | 12.691         | 11433001 | 49.939  | 625438  | 54.146   |
| 2      | 15.275         | 11460894 | 50.061  | 529660  | 45.854   |
| Totals |                | 22893895 | 100.000 | 1155098 | 100.000  |

Scheme 1, L = (*S*)-SunPhos

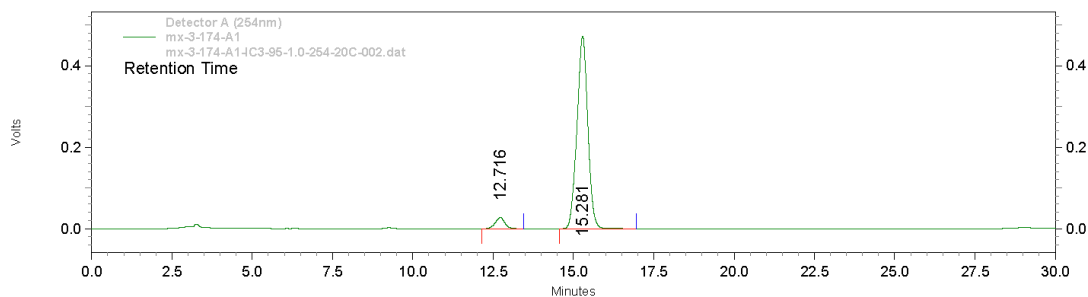

#### Detector A (254nm)

| PK #   | Retention Time | Area     | Area %  | Height | Height % |
|--------|----------------|----------|---------|--------|----------|
| 1      | 12.716         | 545301   | 4.691   | 27172  | 5.440    |
| 2      | 15.281         | 11079221 | 95.309  | 472283 | 94.560   |
| Totals |                | 11624523 | 100.000 | 499455 | 100.000  |

90.6% ee

Scheme 1, L = (R)-Tol-SunPhos

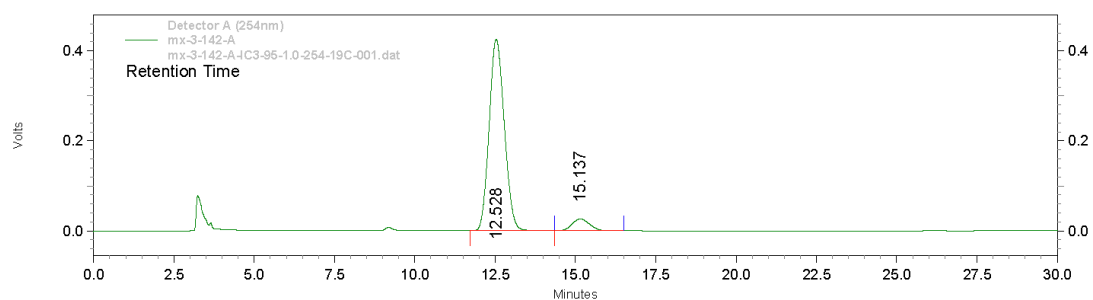

Detector A (254nm)

| PK #   | Retention Time | Area     | Area %  | Height | Height % |
|--------|----------------|----------|---------|--------|----------|
| 1      | 12.528         | 13998644 | 93.369  | 426023 | 94.201   |
| 2      | 15.137         | 994096   | 6.631   | 26226  | 5.799    |
| Totals |                | 14992740 | 100.000 | 452249 | 100.000  |

86.7% ee

Scheme 1, L = (R)-DTBM-SunPhos

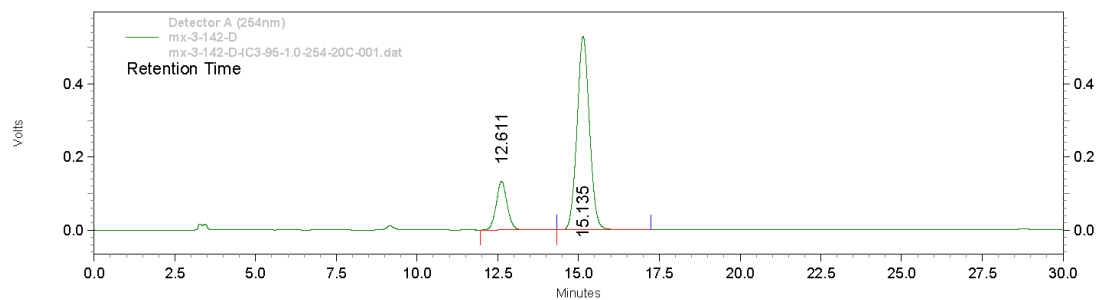

Detector A (254nm)

| PK #   | Retention Time | Area     | Area %  | Height | Height % |
|--------|----------------|----------|---------|--------|----------|
| 1      | 12.611         | 3126806  | 17.993  | 133089 | 20.075   |
| 2      | 15.135         | 14251539 | 82.007  | 529873 | 79.925   |
| Totals |                | 17378345 | 100.000 | 662962 | 100.000  |

64.0% ee



Scheme 1, L = (*R*)-BINAP

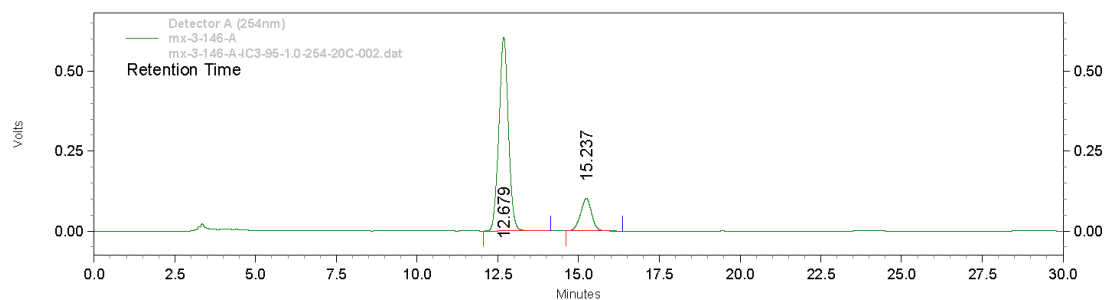

Detector A (254nm)

| Pk #   | Retention Time | Area     | Area %  | Height | Height % |
|--------|----------------|----------|---------|--------|----------|
| 1      | 12.679         | 12389304 | 83.763  | 605345 | 85.572   |
| 2      | 15.237         | 2401540  | 16.237  | 102063 | 14.428   |
| Totals |                | 14790844 | 100.000 | 707408 | 100.000  |

67.5% ee

Scheme 1, L = (*S*)-SEGPhos

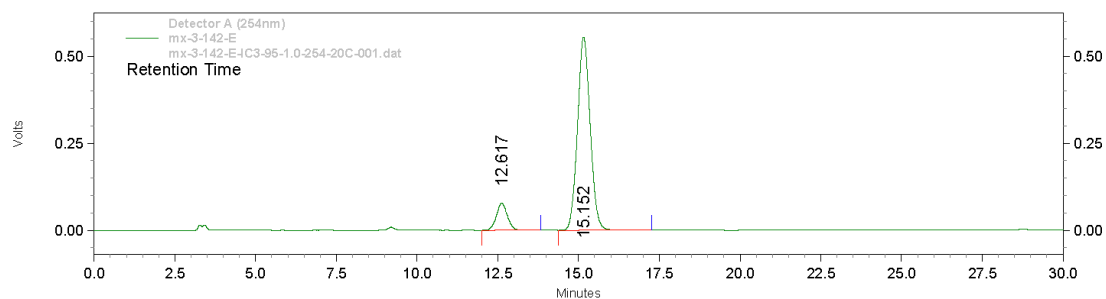

Detector A (254nm)

| Pk #   | Retention Time | Area     | Area %  | Height | Height % |
|--------|----------------|----------|---------|--------|----------|
| 1      | 12.617         | 1828281  | 10.776  | 77628  | 12.288   |
| 2      | 15.152         | 15137931 | 89.224  | 554125 | 87.712   |
| Totals |                | 16966212 | 100.000 | 631754 | 100.000  |

78.4% ee

Scheme 1, L = (*S*)-MeO-BIPHEP

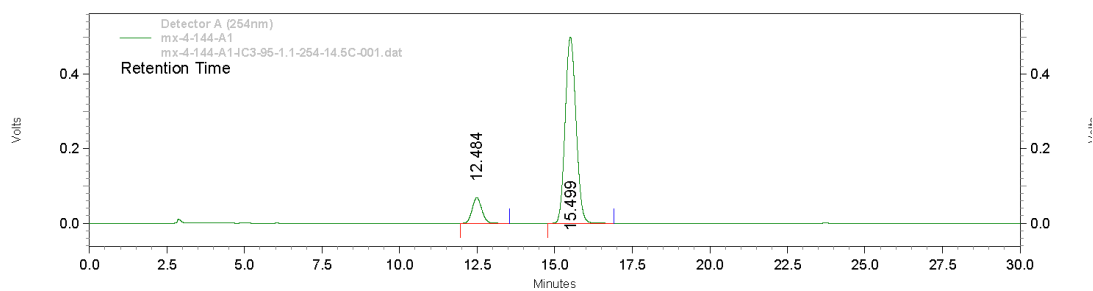

Detector A (254nm)

| Pk # | Retention Time | Area | Area % | Height | Height % |
|------|----------------|------|--------|--------|----------|
|------|----------------|------|--------|--------|----------|

|   |        |          |        |        |        |          |
|---|--------|----------|--------|--------|--------|----------|
| 1 | 12.484 | 1472390  | 10.841 | 68233  | 12.019 | 78.3% ee |
| 2 | 15.499 | 12109823 | 89.159 | 499465 | 87.981 |          |

|        |  |          |         |        |         |
|--------|--|----------|---------|--------|---------|
| Totals |  | 13582213 | 100.000 | 567698 | 100.000 |
|--------|--|----------|---------|--------|---------|

Scheme 1, L = (*R*)-SYNPhos

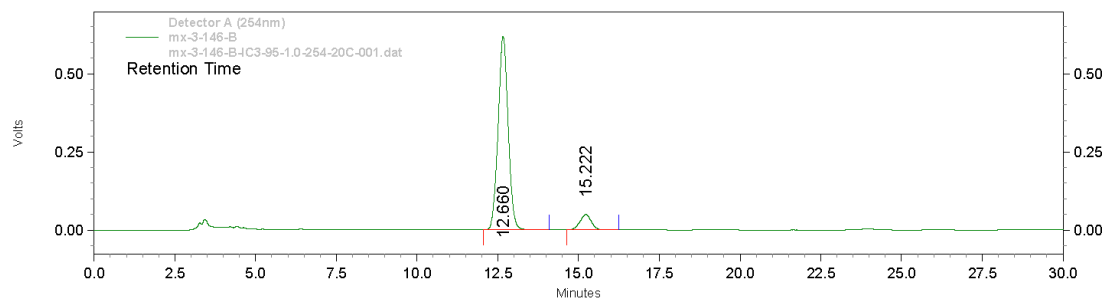

Detector A (254nm)

| Pk # | Retention Time | Area | Area % | Height | Height % |
|------|----------------|------|--------|--------|----------|
|------|----------------|------|--------|--------|----------|

|   |        |          |        |        |        |          |
|---|--------|----------|--------|--------|--------|----------|
| 1 | 12.660 | 13434688 | 91.761 | 618991 | 92.558 | 83.5% ee |
| 2 | 15.222 | 1206241  | 8.239  | 49768  | 7.442  |          |

|        |  |          |         |        |         |
|--------|--|----------|---------|--------|---------|
| Totals |  | 14640929 | 100.000 | 668759 | 100.000 |
|--------|--|----------|---------|--------|---------|

Scheme 1, L = (*S*)-*p*-CF<sub>3</sub>-SYNPhos

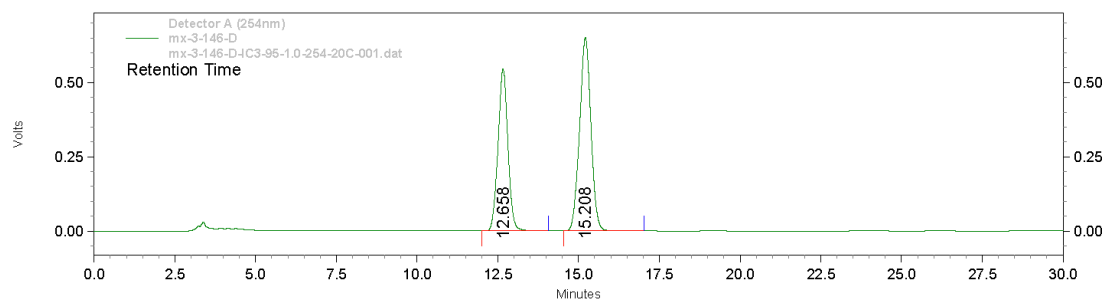

| Detector A (254nm) |                |          |         |         |          |
|--------------------|----------------|----------|---------|---------|----------|
| Pk #               | Retention Time | Area     | Area %  | Height  | Height % |
| 1                  | 12.658         | 11636829 | 42.255  | 545878  | 45.580   |
| 2                  | 15.208         | 15902835 | 57.745  | 651746  | 54.420   |
| Totals             |                | 27539664 | 100.000 | 1197625 | 100.000  |

15.5% ee

Table 1

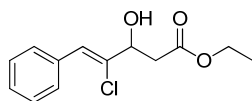

2a

Racemate (Chiralpak IC-3 column, hexane/*i*-PrOH 95/5, 1.0 mL min<sup>-1</sup>, 254 nm)

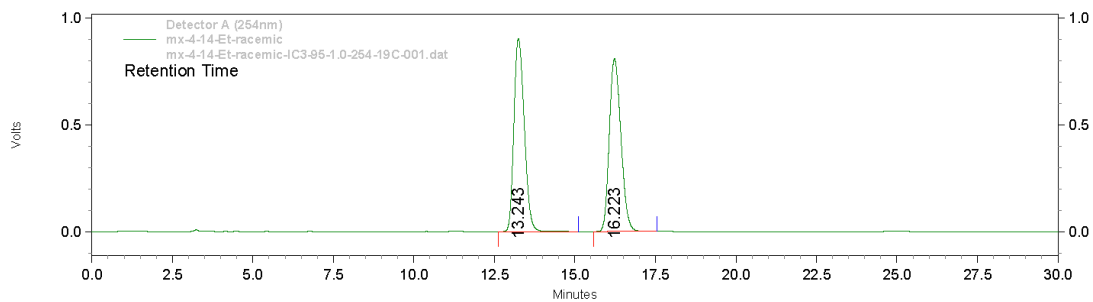

| Detector A (254nm) |                |          |         |         |          |
|--------------------|----------------|----------|---------|---------|----------|
| Pk #               | Retention Time | Area     | Area %  | Height  | Height % |
| 1                  | 13.243         | 20235609 | 49.899  | 903557  | 52.769   |
| 2                  | 16.223         | 20317143 | 50.101  | 808730  | 47.231   |
| Totals             |                | 40552752 | 100.000 | 1712287 | 100.000  |

Retention time changed a little due to temperature changed. We don't have thermostatted column compartment.

Racemate (Chiralpak IC-3 column, hexane/*i*-PrOH 97/3, 0.7 mL min<sup>-1</sup>, 254 nm)

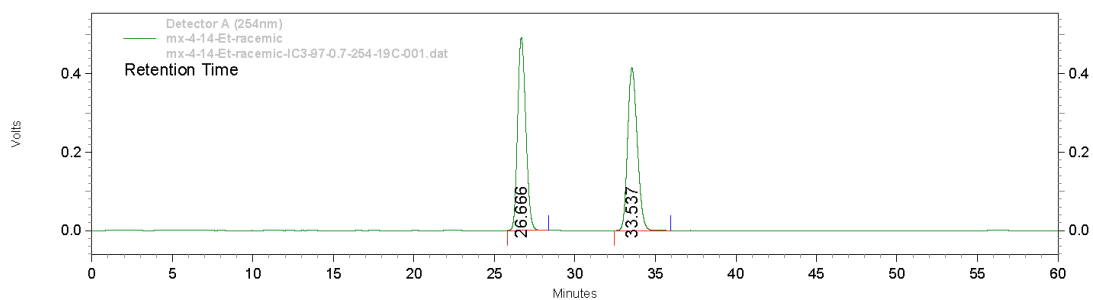

Detector A (254nm)

| PK #   | Retention Time | Area     | Area %  | Height | Height % |
|--------|----------------|----------|---------|--------|----------|
| 1      | 26.666         | 17432053 | 50.129  | 492935 | 54.236   |
| 2      | 33.537         | 17342017 | 49.871  | 415941 | 45.764   |
| Totals |                | 34774070 | 100.000 | 908876 | 100.000  |

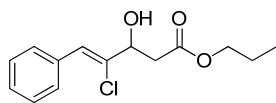

2b

Racemate (Chiralpak IC-3 column, hexane/*i*-PrOH 97/3, 0.7 mL min<sup>-1</sup>, 254 nm)

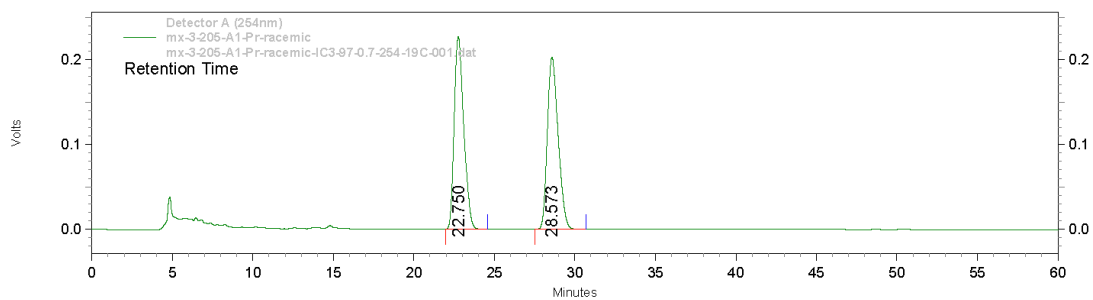

Detector A (254nm)

| PK #   | Retention Time | Area     | Area %  | Height | Height % |
|--------|----------------|----------|---------|--------|----------|
| 1      | 22.750         | 9361323  | 49.706  | 227247 | 52.856   |
| 2      | 28.573         | 9472096  | 50.294  | 202689 | 47.144   |
| Totals |                | 18833419 | 100.000 | 429936 | 100.000  |

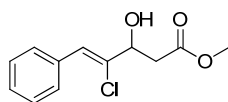

**2c**

Racemate (Chiralpak IC-3 column, hexane/*i*-PrOH 97/3, 0.7 mL min<sup>-1</sup>, 254 nm)

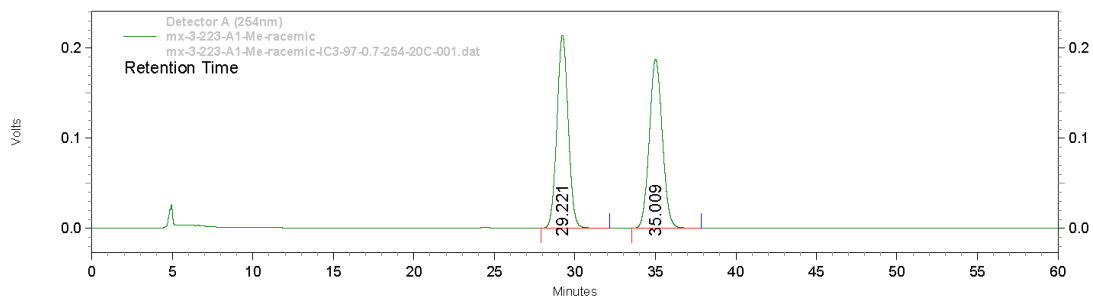

| Detector A (254nm) |                |          |         |        |          |
|--------------------|----------------|----------|---------|--------|----------|
| Pk #               | Retention Time | Area     | Area %  | Height | Height % |
| 1                  | 29.221         | 10413312 | 49.798  | 213513 | 53.301   |
| 2                  | 35.009         | 10497818 | 50.202  | 187065 | 46.699   |
| Totals             |                | 20911130 | 100.000 | 400578 | 100.000  |

Table 1, entry 1 (**2a**) (hexane/*i*-PrOH 95/5, 1.0 mL min<sup>-1</sup>, 254 nm)

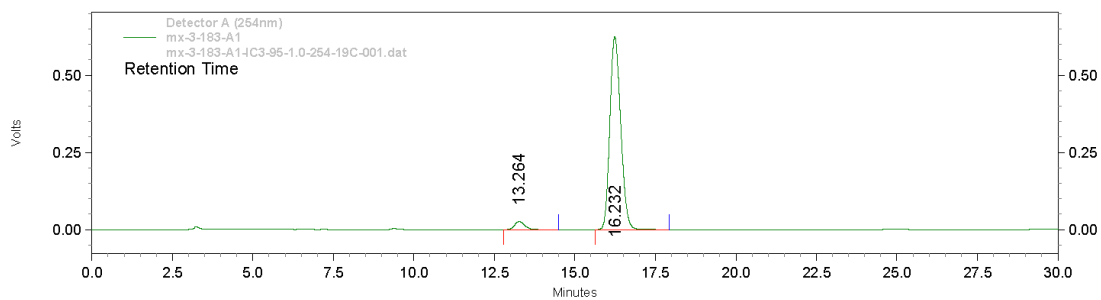

| Detector A (254nm) |                |          |         |        |          |
|--------------------|----------------|----------|---------|--------|----------|
| Pk #               | Retention Time | Area     | Area %  | Height | Height % |
| 1                  | 13.264         | 547659   | 3.606   | 25520  | 3.920    |
| 2                  | 16.232         | 14638115 | 96.394  | 625449 | 96.080   |
| Totals             |                | 15185774 | 100.000 | 650969 | 100.000  |

92.8% ee

Table 1, entry 2 (**2a**) (hexane/*i*-PrOH 95/5, 1.0 mL min<sup>-1</sup>, 254 nm)

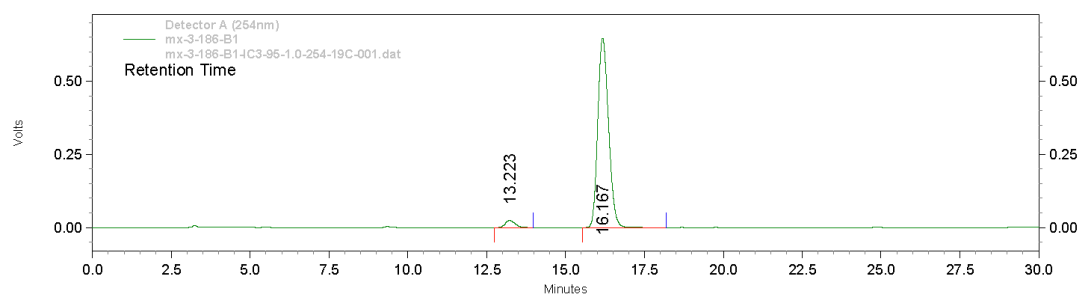

Detector A (254nm)

| Pk #   | Retention Time | Area     | Area %  | Height | Height % |          |
|--------|----------------|----------|---------|--------|----------|----------|
| 1      | 13.223         | 513383   | 3.246   | 23893  | 3.566    | 93.5% ee |
| 2      | 16.167         | 15304752 | 96.754  | 646134 | 96.434   |          |
| Totals |                | 15818135 | 100.000 | 670027 | 100.000  |          |

Table 1, entry 3 (**2a**) (hexane/*i*-PrOH 97/3, 0.7 mL min<sup>-1</sup>, 254 nm)

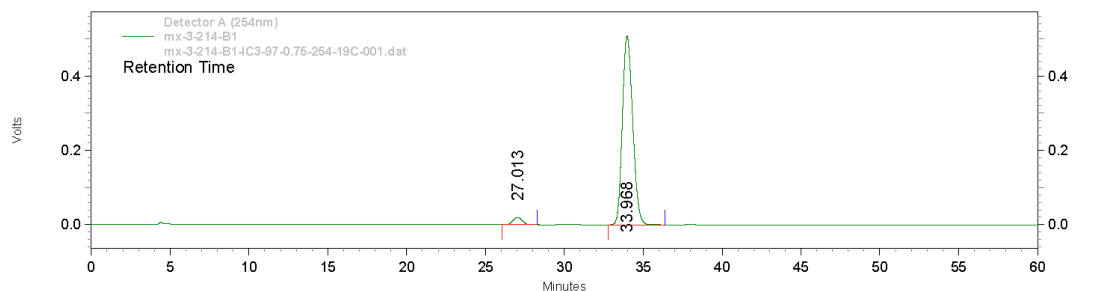

Detector A (254nm)

| Pk #   | Retention Time | Area     | Area %  | Height | Height % |          |
|--------|----------------|----------|---------|--------|----------|----------|
| 1      | 27.013         | 796148   | 3.324   | 19835  | 3.752    | 93.4% ee |
| 2      | 33.968         | 23158409 | 96.676  | 508825 | 96.248   |          |
| Totals |                | 23954557 | 100.000 | 528659 | 100.000  |          |

Table 1, entry 3 (**2c**) (hexane/*i*-PrOH 97/3, 0.7 mL min<sup>-1</sup>, 254 nm)

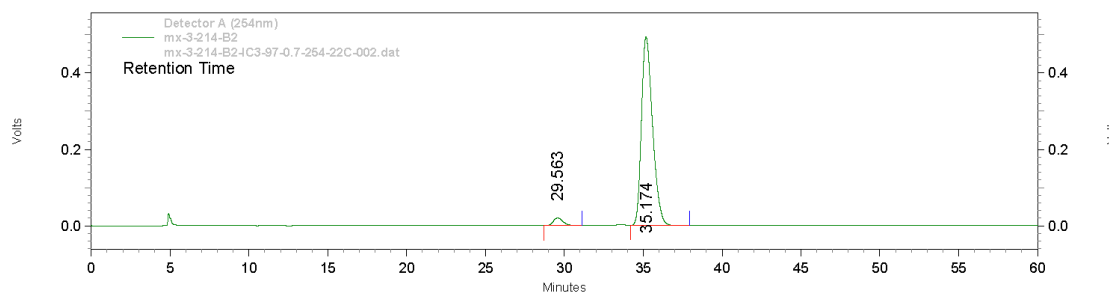

Detector A (254nm)

| PK #   | Retention Time | Area     | Area %  | Height | Height % |
|--------|----------------|----------|---------|--------|----------|
| 1      | 29.563         | 849963   | 3.405   | 20262  | 3.938    |
| 2      | 35.174         | 24110525 | 96.595  | 494328 | 96.062   |
| Totals |                | 24960488 | 100.000 | 514590 | 100.000  |

93.2% ee

Table 1, entry 4 (**2a**) (hexane/*i*-PrOH 97/3, 0.7 mL min<sup>-1</sup>, 254 nm)

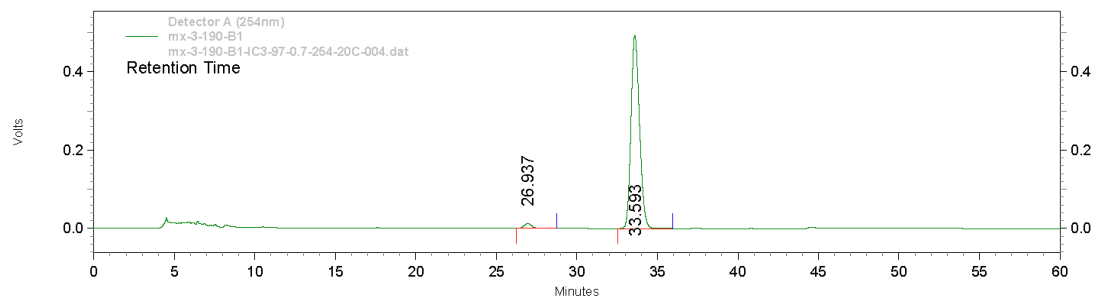

Detector A (254nm)

| PK #   | Retention Time | Area     | Area %  | Height | Height % |
|--------|----------------|----------|---------|--------|----------|
| 1      | 26.937         | 421518   | 2.266   | 12752  | 2.521    |
| 2      | 33.593         | 18184367 | 97.734  | 493081 | 97.479   |
| Totals |                | 18605885 | 100.000 | 505833 | 100.000  |

95.5% ee

Table 1, entry 4 (**2b**) (hexane/*i*-PrOH 97/3, 0.7 mL min<sup>-1</sup>)

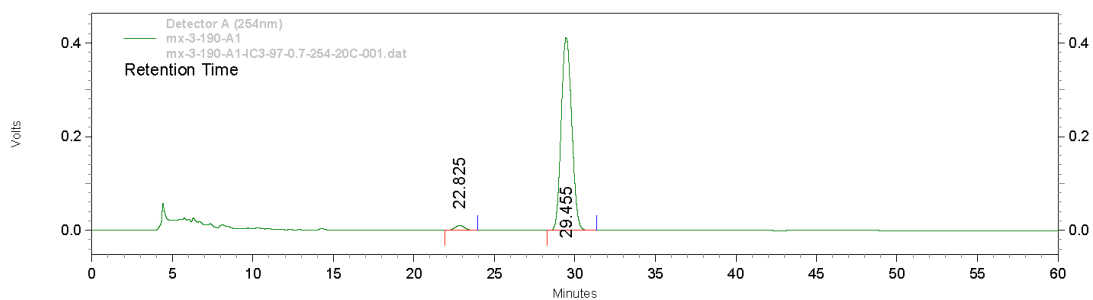

**Detector A (254nm)**

| Pk #          | Retention Time | Area     | Area %  | Height | Height % |
|---------------|----------------|----------|---------|--------|----------|
| 1             | 22.825         | 422419   | 2.208   | 9910   | 2.351    |
| 2             | 29.455         | 18709242 | 97.792  | 411651 | 97.649   |
| <b>Totals</b> |                | 19131661 | 100.000 | 421561 | 100.000  |

95.6% ee

Table 1, entry 5 (**2b**) (hexane/*i*-PrOH 97/3, 0.7 mL min<sup>-1</sup>)

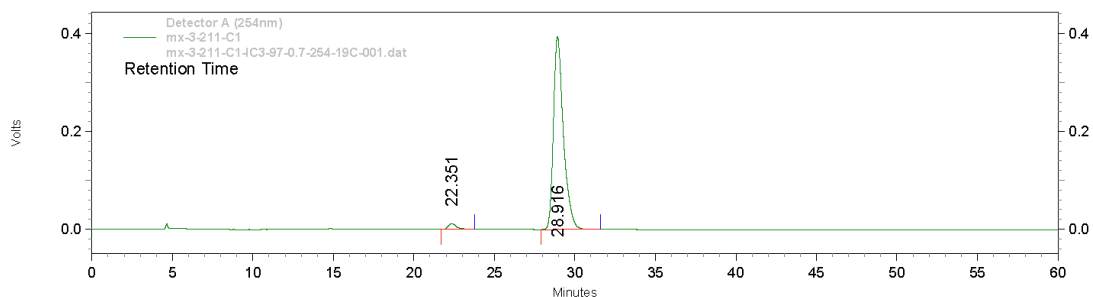

**Detector A (254nm)**

| Pk #          | Retention Time | Area     | Area %  | Height | Height % |
|---------------|----------------|----------|---------|--------|----------|
| 1             | 22.351         | 422856   | 2.425   | 11947  | 2.938    |
| 2             | 28.916         | 17016561 | 97.575  | 394634 | 97.062   |
| <b>Totals</b> |                | 17439416 | 100.000 | 406582 | 100.000  |

95.2% ee



Table 1, entry 6 (**2c**) (hexane/*i*-PrOH 97/3, 0.7 mL min<sup>-1</sup>)

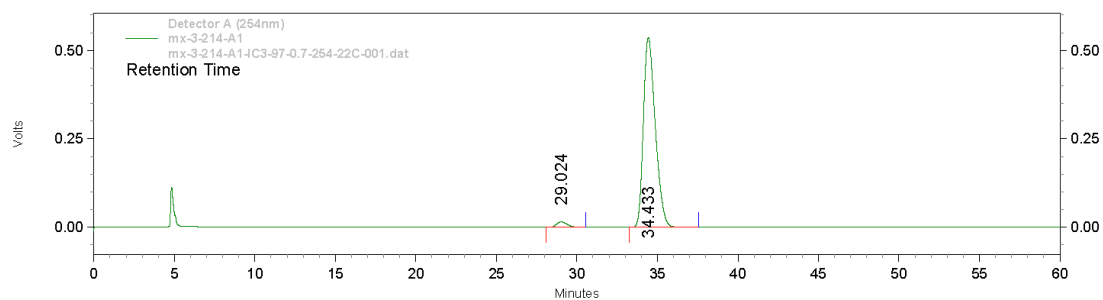

Detector A (254nm)

| PK # | Retention Time | Area     | Area % | Height | Height % |
|------|----------------|----------|--------|--------|----------|
| 1    | 29.024         | 717738   | 2.536  | 15254  | 2.762    |
| 2    | 34.433         | 27582809 | 97.464 | 537116 | 97.238   |

94.9% ee

| Totals | Area     | Area %  | Height | Height % |
|--------|----------|---------|--------|----------|
|        | 28300547 | 100.000 | 552370 | 100.000  |

Table 1, entry 7 & Table 2, entry 1 (**2c**) (hexane/*i*-PrOH 97/3, 0.7 mL min<sup>-1</sup>)

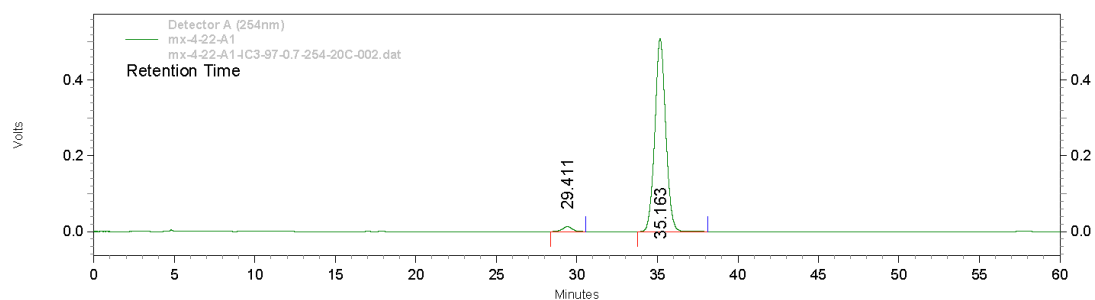

Detector A (254nm)

| PK # | Retention Time | Area     | Area % | Height | Height % |
|------|----------------|----------|--------|--------|----------|
| 1    | 29.411         | 526424   | 2.160  | 12916  | 2.472    |
| 2    | 35.163         | 23847865 | 97.840 | 509454 | 97.528   |

95.7% ee

| Totals | Area     | Area %  | Height | Height % |
|--------|----------|---------|--------|----------|
|        | 24374289 | 100.000 | 522369 | 100.000  |

Table 2, entry 2 (**2d**)

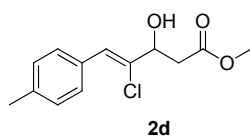

Chiralpak IC-3 column, hexane/*i*-PrOH 95/5, 0.7 mL min<sup>-1</sup>, 254 nm

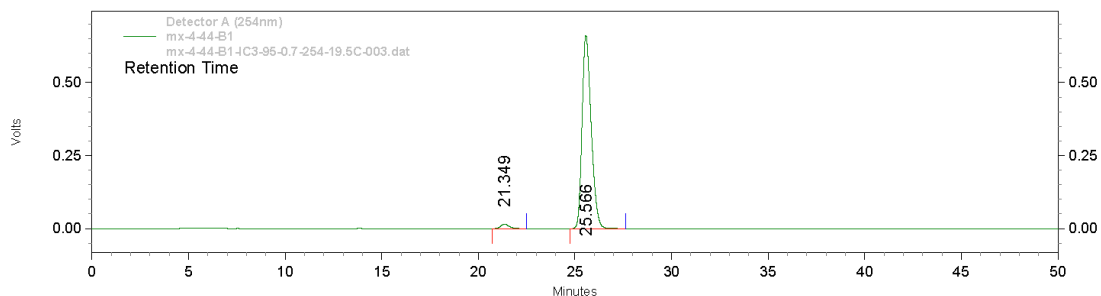

Detector A (254nm)

| PK #   | Retention Time | Area     | Area %  | Height | Height % |          |
|--------|----------------|----------|---------|--------|----------|----------|
| 1      | 21.349         | 439236   | 1.985   | 15814  | 2.336    | 96.0% ee |
| 2      | 25.566         | 21685188 | 98.015  | 661291 | 97.664   |          |
| Totals |                | 22124424 | 100.000 | 677105 | 100.000  |          |

Racemate

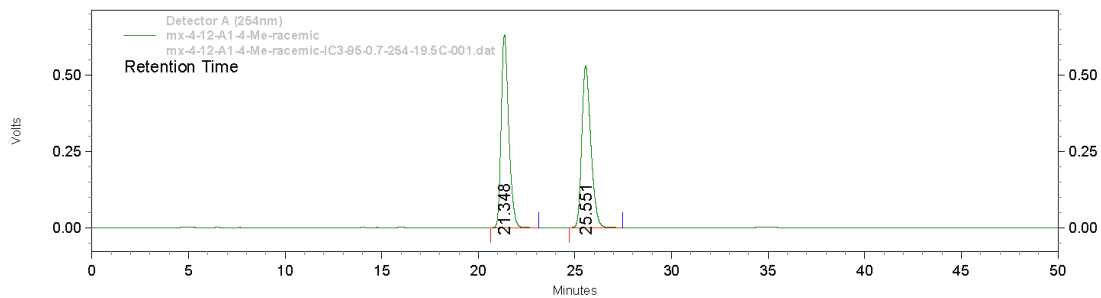

Detector A (254nm)

| PK #   | Retention Time | Area     | Area %  | Height  | Height % |  |
|--------|----------------|----------|---------|---------|----------|--|
| 1      | 21.348         | 17109236 | 49.810  | 632349  | 54.468   |  |
| 2      | 25.551         | 17239772 | 50.190  | 528600  | 45.532   |  |
| Totals |                | 34349008 | 100.000 | 1160949 | 100.000  |  |

Table 2, entry 3 (**2e**)

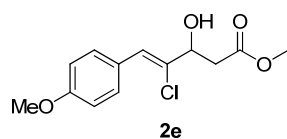

Chiralpak IC-3 column, hexane/*i*-PrOH 95/5, 0.9 mL min<sup>-1</sup>, 254 nm

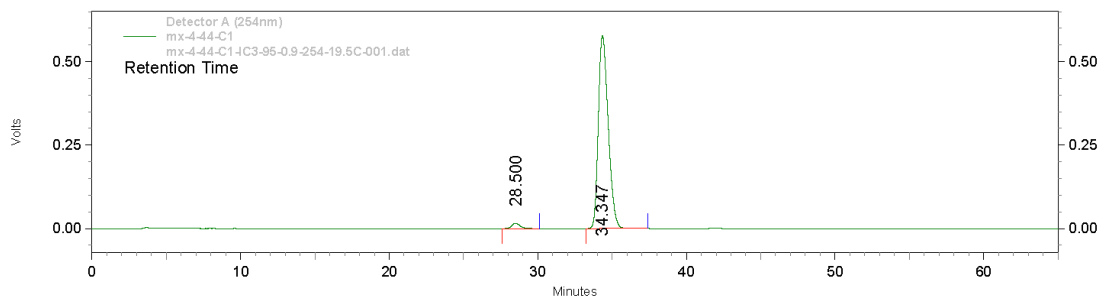

Detector A (254nm)

| PK #   | Retention Time | Area     | Area %  | Height | Height % |                 |
|--------|----------------|----------|---------|--------|----------|-----------------|
| 1      | 28.500         | 599752   | 2.202   | 15351  | 2.585    | <b>95.6% ee</b> |
| 2      | 34.347         | 26638906 | 97.798  | 578573 | 97.415   |                 |
| Totals |                | 27238658 | 100.000 | 593924 | 100.000  |                 |

Racemate

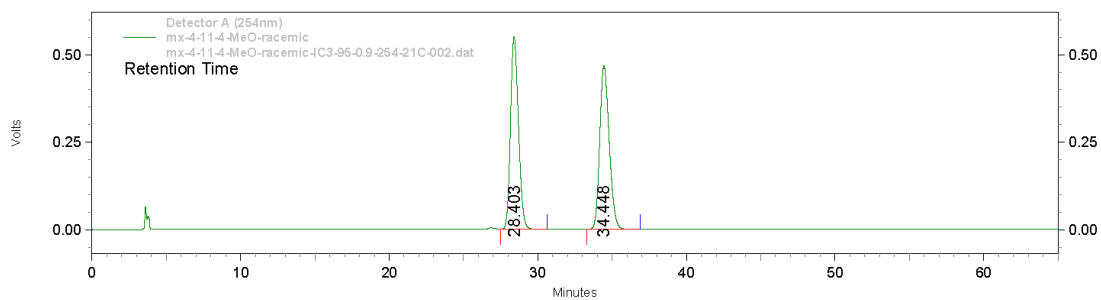

Detector A (254nm)

| PK #   | Retention Time | Area     | Area %  | Height  | Height % |  |
|--------|----------------|----------|---------|---------|----------|--|
| 1      | 28.403         | 20524716 | 49.764  | 551154  | 54.118   |  |
| 2      | 34.448         | 20719744 | 50.236  | 467279  | 45.882   |  |
| Totals |                | 41244460 | 100.000 | 1018433 | 100.000  |  |

Table 2, entry 4 (**2f**)

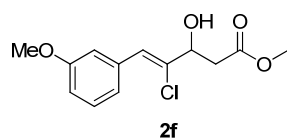

Chiralpak IC-3 column, hexane/*i*-PrOH 95/5, 0.9 mL min<sup>-1</sup>, 254 nm

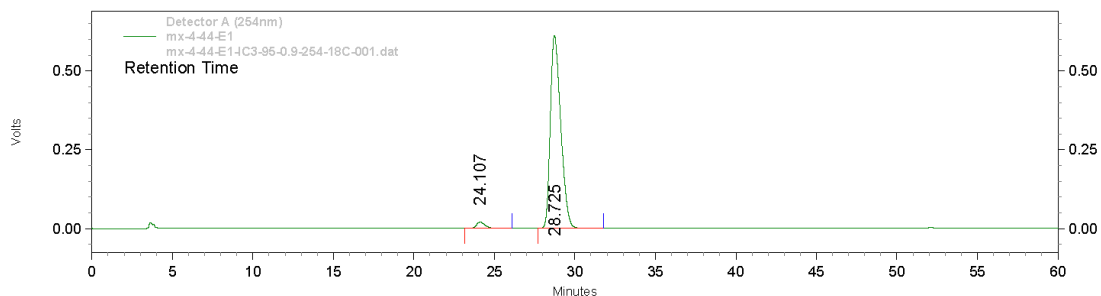

Detector A (254nm)

| PK #   | Retention Time | Area     | Area %  | Height | Height % |          |
|--------|----------------|----------|---------|--------|----------|----------|
| 1      | 24.107         | 744569   | 2.627   | 19645  | 3.111    | 94.7% ee |
| 2      | 28.725         | 27596554 | 97.373  | 611912 | 96.889   |          |
| Totals |                | 28341124 | 100.000 | 631557 | 100.000  |          |

Racemate

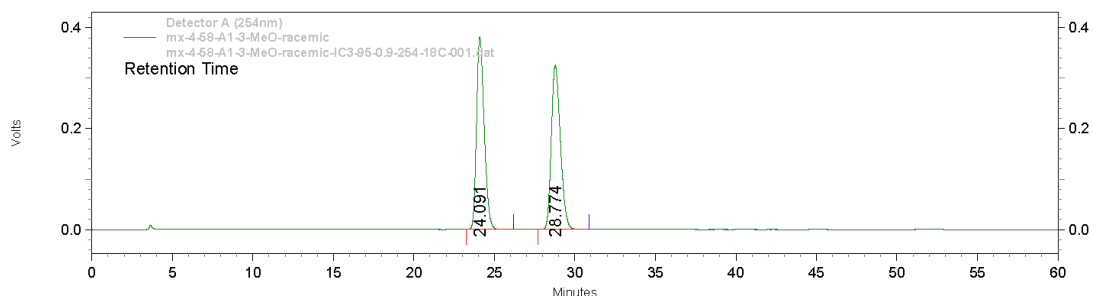

Detector A (254nm)

| PK #   | Retention Time | Area     | Area %  | Height | Height % |  |
|--------|----------------|----------|---------|--------|----------|--|
| 1      | 24.091         | 12667111 | 49.744  | 382227 | 54.032   |  |
| 2      | 28.774         | 12797283 | 50.256  | 325184 | 45.968   |  |
| Totals |                | 25464394 | 100.000 | 707411 | 100.000  |  |

Table 2, entry 5 (**2g**)

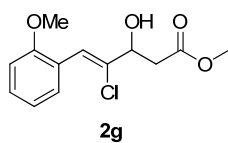

Chiralpak IC-3 column, hexane/*i*-PrOH 90/10, 0.7 mL min<sup>-1</sup>, 254 nm

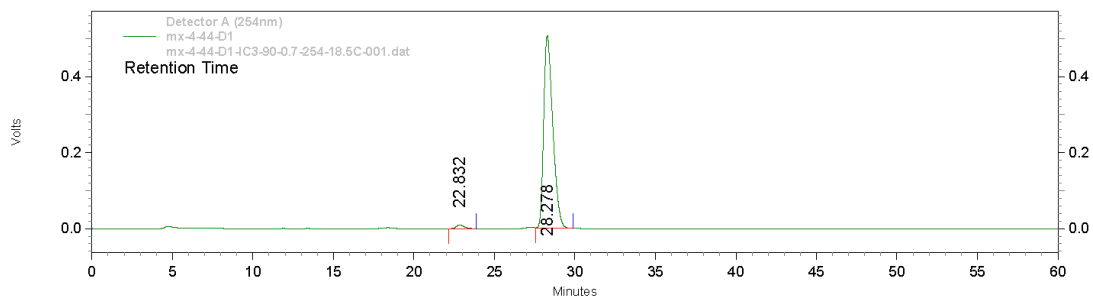

Detector A (254nm)

| PK #   | Retention Time | Area     | Area %  | Height | Height % |          |
|--------|----------------|----------|---------|--------|----------|----------|
| 1      | 22.832         | 303726   | 1.509   | 9490   | 1.839    | 97.0% ee |
| 2      | 28.278         | 19829582 | 98.491  | 506622 | 98.161   |          |
| Totals |                | 20133308 | 100.000 | 516112 | 100.000  |          |

Racemate

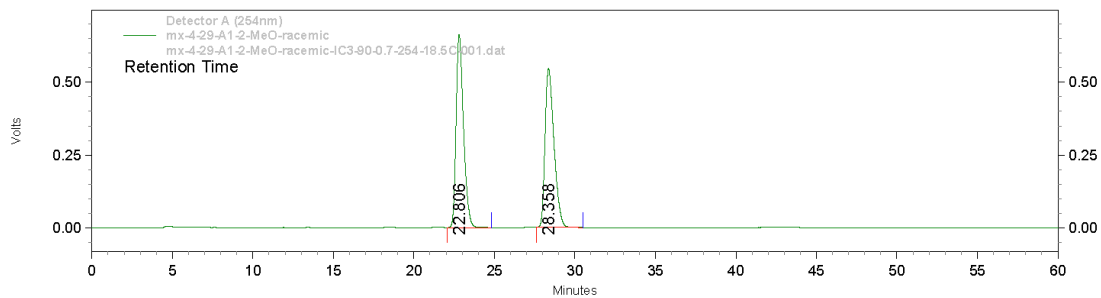

Detector A (254nm)

| PK #   | Retention Time | Area     | Area %  | Height  | Height % |  |
|--------|----------------|----------|---------|---------|----------|--|
| 1      | 22.806         | 21185829 | 50.192  | 664206  | 54.843   |  |
| 2      | 28.358         | 21023669 | 49.808  | 546900  | 45.157   |  |
| Totals |                | 42209498 | 100.000 | 1211106 | 100.000  |  |

Table 2, entry 6 (**2h**)

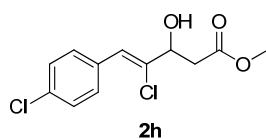

Chiralpak IC-3 column, hexane/*i*-PrOH 95/5, 0.7 mL min<sup>-1</sup>, 254 nm

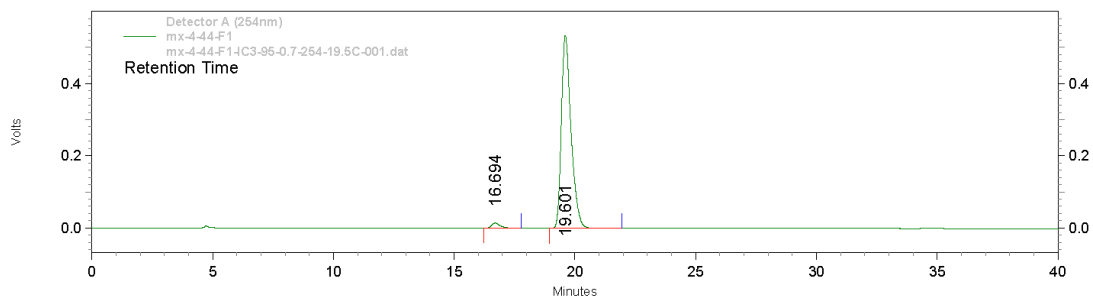

| Detector A (254nm) |                |          |         |        |          |
|--------------------|----------------|----------|---------|--------|----------|
| PK #               | Retention Time | Area     | Area %  | Height | Height % |
| 1                  | 16.694         | 353452   | 2.328   | 14500  | 2.645    |
| 2                  | 19.601         | 14831456 | 97.672  | 533733 | 97.355   |
| 95.3% ee           |                |          |         |        |          |
| Totals             |                | 15184908 | 100.000 | 548233 | 100.000  |

Racemate

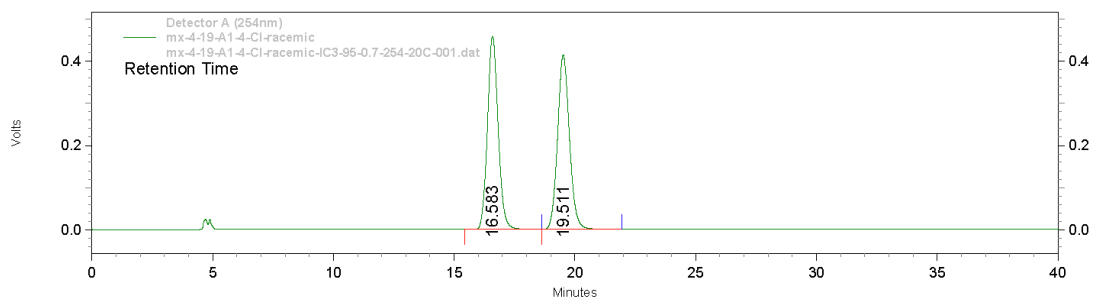

| Detector A (254nm) |                |          |         |        |          |
|--------------------|----------------|----------|---------|--------|----------|
| PK #               | Retention Time | Area     | Area %  | Height | Height % |
| 1                  | 16.583         | 14112902 | 49.907  | 458624 | 52.549   |
| 2                  | 19.511         | 14165251 | 50.093  | 414125 | 47.451   |
| Totals             |                | 28278153 | 100.000 | 872749 | 100.000  |

Table 2, entry 7 (**2i**)

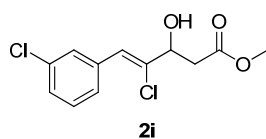

Chiralpak IC-3 column, hexane/*i*-PrOH 95/5, 0.5 mL min<sup>-1</sup>, 254 nm

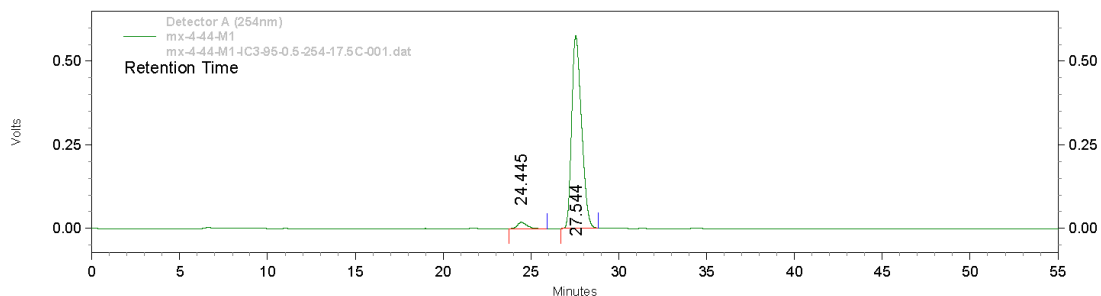

Detector A (254nm)

| PK #   | Retention Time | Area     | Area %  | Height | Height % |          |
|--------|----------------|----------|---------|--------|----------|----------|
| 1      | 24.445         | 670611   | 2.918   | 18782  | 3.157    | 94.2% ee |
| 2      | 27.544         | 22309548 | 97.082  | 576143 | 96.843   |          |
| Totals |                | 22980159 | 100.000 | 594925 | 100.000  |          |

Racemate

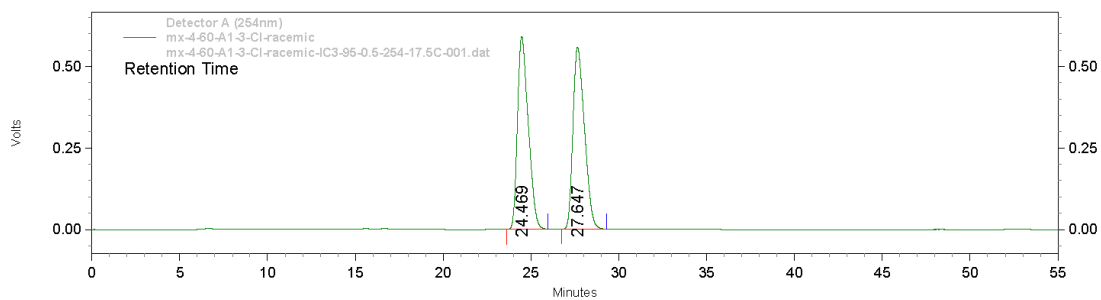

Detector A (254nm)

| PK #   | Retention Time | Area     | Area %  | Height  | Height % |  |
|--------|----------------|----------|---------|---------|----------|--|
| 1      | 24.469         | 25193065 | 49.788  | 590745  | 51.466   |  |
| 2      | 27.647         | 25407237 | 50.212  | 557100  | 48.534   |  |
| Totals |                | 50600302 | 100.000 | 1147845 | 100.000  |  |

Table 2, entry 8 (**2j**)

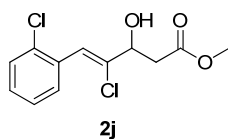

Chiralpak IC-3 column, hexane/*i*-PrOH 97/3, 0.7 mL min<sup>-1</sup>, 254 nm

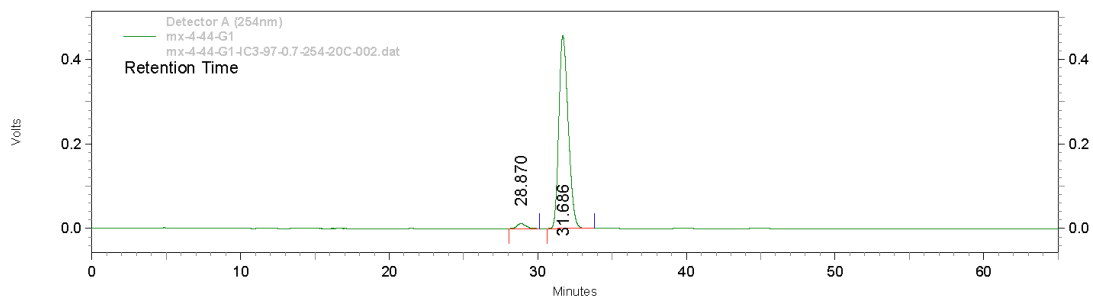

Detector A (254nm)

| PK #   | Retention Time | Area     | Area %  | Height | Height % |                 |
|--------|----------------|----------|---------|--------|----------|-----------------|
| 1      | 28.870         | 456490   | 2.226   | 11610  | 2.479    | <b>95.5% ee</b> |
| 2      | 31.686         | 20053652 | 97.774  | 456715 | 97.521   |                 |
| Totals |                |          | 100.000 | 468325 | 100.000  |                 |

Racemate

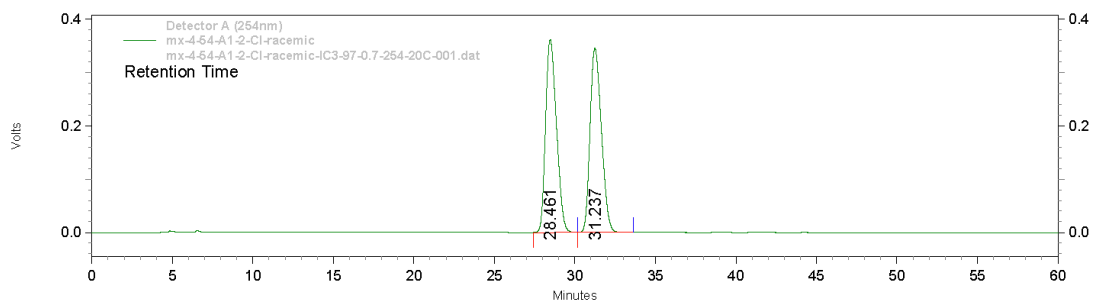

Detector A (254nm)

| PK #   | Retention Time | Area     | Area %  | Height | Height % |  |
|--------|----------------|----------|---------|--------|----------|--|
| 1      | 28.461         | 16945502 | 50.043  | 361316 | 51.121   |  |
| 2      | 31.237         | 16916643 | 49.957  | 345467 | 48.879   |  |
| Totals |                | 33862144 | 100.000 | 706782 | 100.000  |  |



Table 2, entry 9 (**2k**)

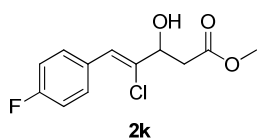

Chiralpak IC-3 column, hexane/*i*-PrOH 95/5, 0.7 mL min<sup>-1</sup>, 254 nm

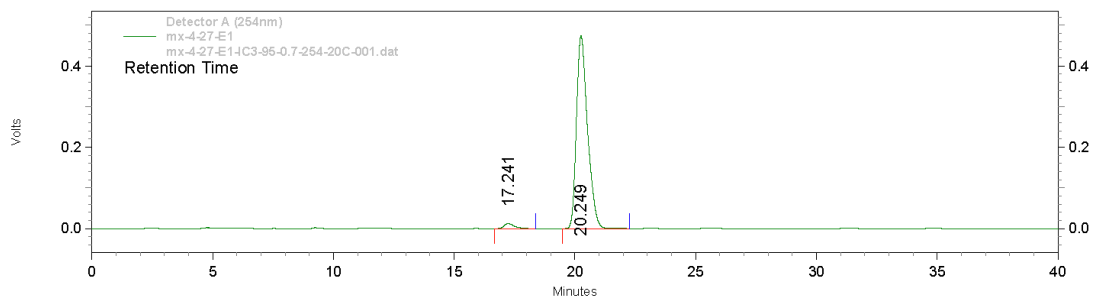

Detector A (254nm)

| PK #     | Retention Time | Area     | Area %  | Height | Height % |
|----------|----------------|----------|---------|--------|----------|
| 1        | 17.241         | 353165   | 2.280   | 12356  | 2.537    |
| 2        | 20.249         | 15133227 | 97.720  | 474651 | 97.463   |
| 95.4% ee |                |          |         |        |          |
| Totals   |                | 15486393 | 100.000 | 487007 | 100.000  |

Racemate

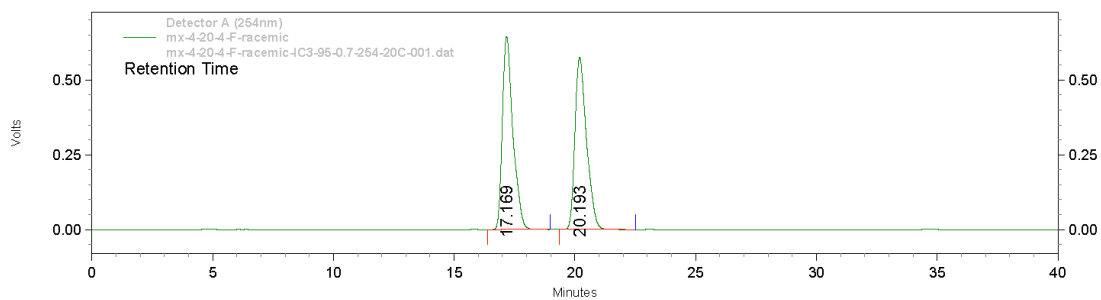

Detector A (254nm)

| PK #   | Retention Time | Area     | Area %  | Height  | Height % |
|--------|----------------|----------|---------|---------|----------|
| 1      | 17.169         | 19589233 | 50.537  | 645164  | 52.855   |
| 2      | 20.193         | 19173310 | 49.463  | 575464  | 47.145   |
| Totals |                | 38762543 | 100.000 | 1220627 | 100.000  |

Table 2, entry 10 (**2I**)

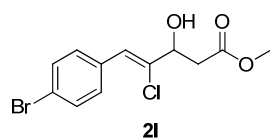

Chiralpak IC-3 column, hexane/*i*-PrOH 97/3, 0.7 mL min<sup>-1</sup>, 254 nm

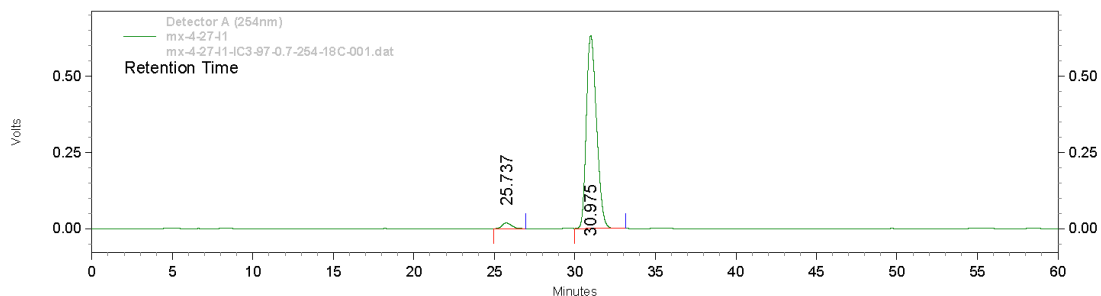

Detector A (254nm)

| PK #   | Retention Time | Area     | Area %  | Height | Height % |
|--------|----------------|----------|---------|--------|----------|
| 1      | 25.737         | 697674   | 2.447   | 18270  | 2.809    |
| 2      | 30.975         | 27815156 | 97.553  | 632074 | 97.191   |
| Totals |                | 28512829 | 100.000 | 650344 | 100.000  |

95.1% ee

Racemate

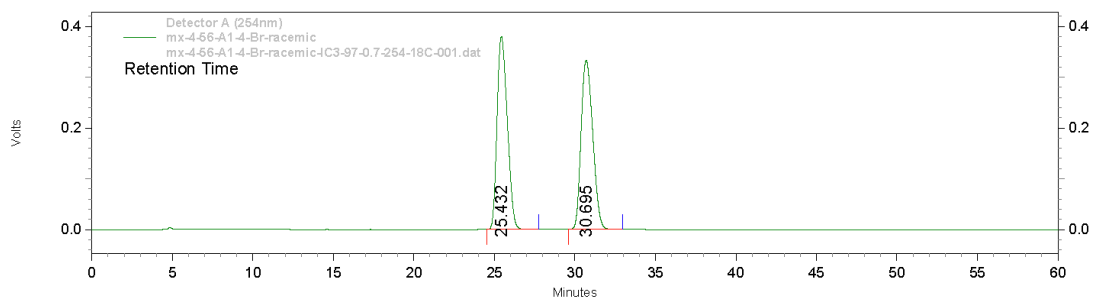

Detector A (254nm)

| PK #   | Retention Time | Area     | Area %  | Height | Height % |
|--------|----------------|----------|---------|--------|----------|
| 1      | 25.432         | 16839185 | 50.102  | 379857 | 53.259   |
| 2      | 30.695         | 16770858 | 49.898  | 333370 | 46.741   |
| Totals |                | 33610043 | 100.000 | 713227 | 100.000  |

Table 2, entry 11 (**2m**)

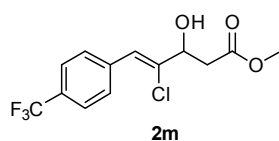

Chiralpak IC-3 column, hexane/*i*-PrOH 97/3, 0.6 mL min<sup>-1</sup>, 254 nm

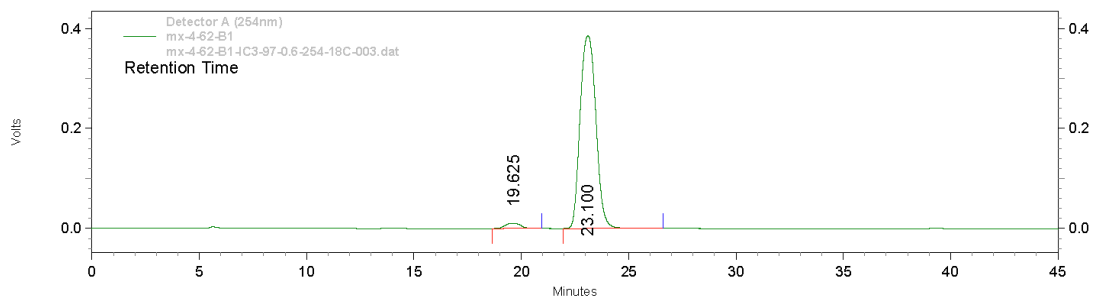

Detector A (254nm)

| PK #   | Retention Time | Area     | Area %  | Height | Height % |
|--------|----------------|----------|---------|--------|----------|
| 1      | 19.625         | 519045   | 2.571   | 10590  | 2.671    |
| 2      | 23.100         | 19665860 | 97.429  | 385923 | 97.329   |
| Totals |                | 20184905 | 100.000 | 396513 | 100.000  |

94.9% ee

Racemate

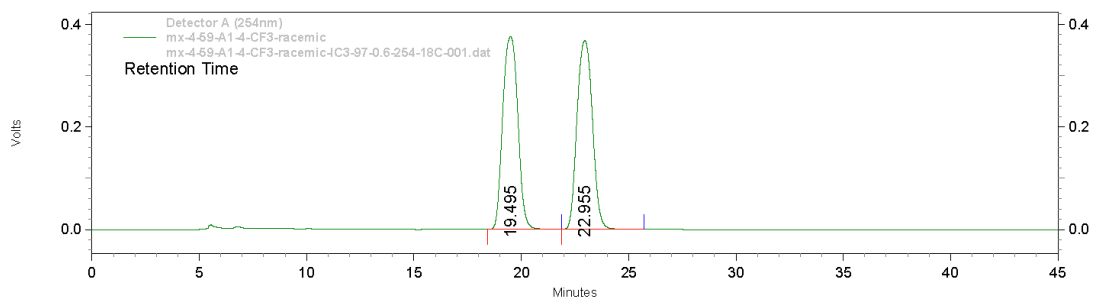

Detector A (254nm)

| PK #   | Retention Time | Area     | Area %  | Height | Height % |
|--------|----------------|----------|---------|--------|----------|
| 1      | 19.495         | 18403861 | 50.022  | 375629 | 50.534   |
| 2      | 22.955         | 18387626 | 49.978  | 367683 | 49.466   |
| Totals |                | 36791487 | 100.000 | 743312 | 100.000  |

Table 2, entry 12 (**2n**)

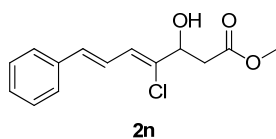

Chiralpak IC-3 column, hexane/*i*-PrOH 95/5, 0.7 mL min<sup>-1</sup>, 254 nm

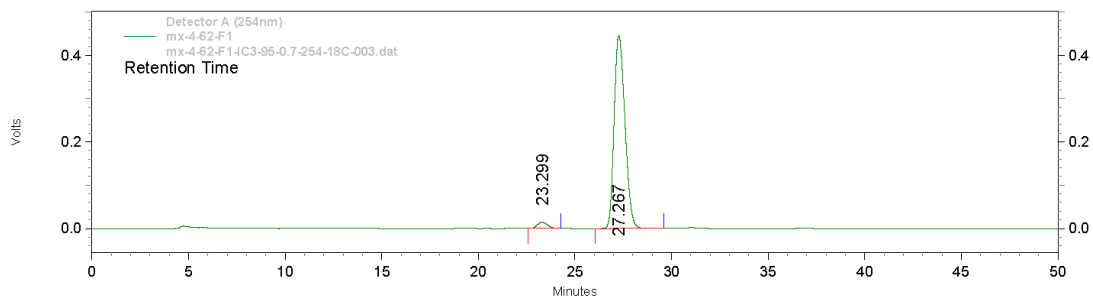

Detector A (254nm)

| PK #   | Retention Time | Area     | Area %  | Height | Height % |
|--------|----------------|----------|---------|--------|----------|
| 1      | 23.299         | 524440   | 2.933   | 14145  | 3.077    |
| 2      | 27.267         | 17358130 | 97.067  | 445542 | 96.923   |
| Totals |                | 17882570 | 100.000 | 459687 | 100.000  |

94.1% ee

Racemate

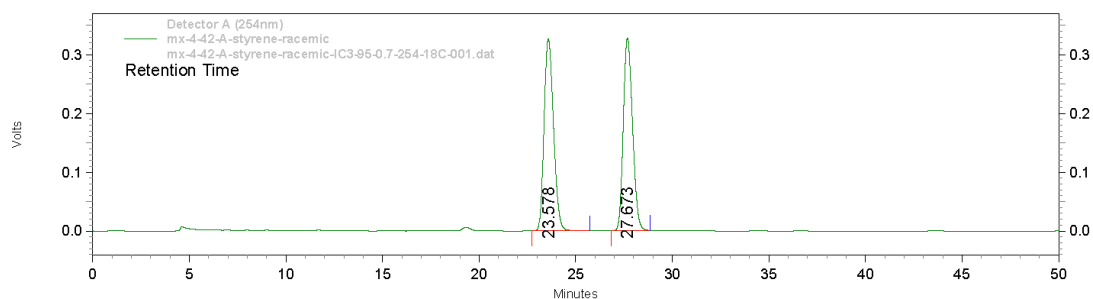

Detector A (254nm)

| PK #   | Retention Time | Area     | Area %  | Height | Height % |
|--------|----------------|----------|---------|--------|----------|
| 1      | 23.578         | 11107145 | 50.490  | 326928 | 49.921   |
| 2      | 27.673         | 10891738 | 49.510  | 327962 | 50.079   |
| Totals |                | 21998883 | 100.000 | 654891 | 100.000  |

Scheme 2 4a-c

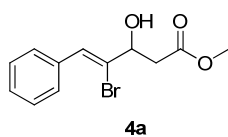

Chiralpak IC-3 column, hexane/*i*-PrOH 95/5, 0.6 mL min<sup>-1</sup>, 254 nm

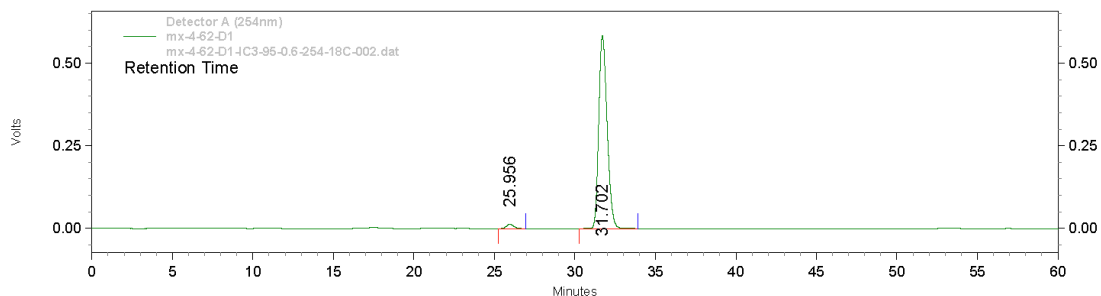

Detector A (254nm)

| PK #     | Retention Time | Area     | Area %  | Height | Height % |
|----------|----------------|----------|---------|--------|----------|
| 1        | 25.956         | 398011   | 1.853   | 13165  | 2.204    |
| 2        | 31.702         | 21082008 | 98.147  | 584157 | 97.796   |
| 96.3% ee |                |          |         |        |          |
| Totals   |                | 21480019 | 100.000 | 597322 | 100.000  |

Racemate

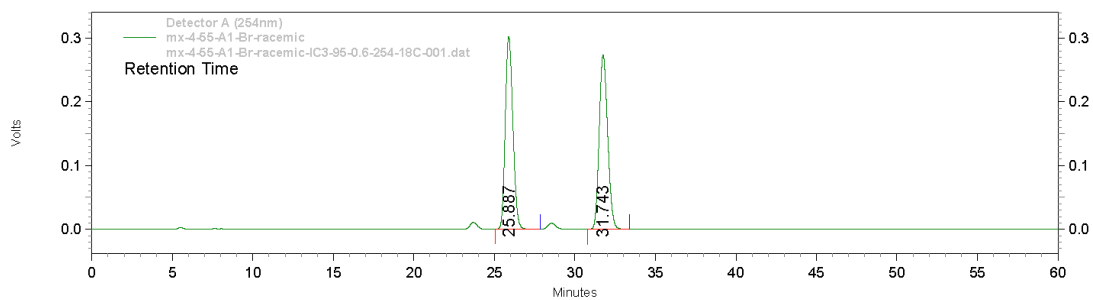

Detector A (254nm)

| PK #   | Retention Time | Area     | Area %  | Height | Height % |
|--------|----------------|----------|---------|--------|----------|
| 1      | 25.887         | 9922574  | 49.855  | 302339 | 52.535   |
| 2      | 31.743         | 9980267  | 50.145  | 273163 | 47.465   |
| Totals |                | 19902841 | 100.000 | 575502 | 100.000  |

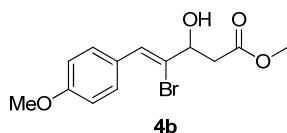

Chiralpak IC-3 column, hexane/*i*-PrOH 90/10, 0.9 mL min<sup>-1</sup>, 254 nm

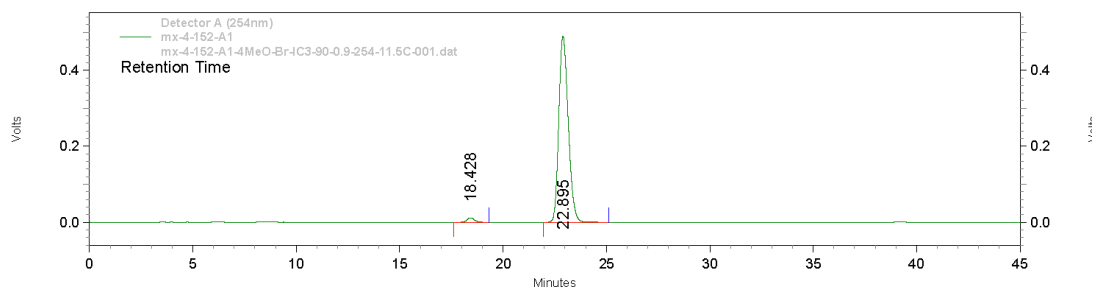

Detector A (254nm)

| Pk #   | Retention Time | Area     | Area %  | Height | Height % |
|--------|----------------|----------|---------|--------|----------|
| 1      | 18.428         | 282108   | 1.786   | 11173  | 2.230    |
| 2      | 22.895         | 15514724 | 98.214  | 489931 | 97.770   |
| Totals |                | 15796832 | 100.000 | 501103 | 100.000  |

96.4% ee

Racemate

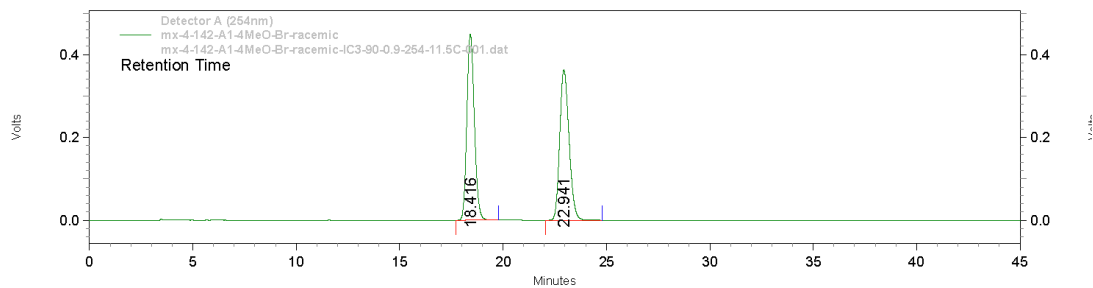

Detector A (254nm)

| Pk #   | Retention Time | Area     | Area %  | Height | Height % |
|--------|----------------|----------|---------|--------|----------|
| 1      | 18.416         | 11361335 | 50.047  | 449430 | 55.319   |
| 2      | 22.941         | 11340063 | 49.953  | 363007 | 44.681   |
| Totals |                | 22701398 | 100.000 | 812437 | 100.000  |

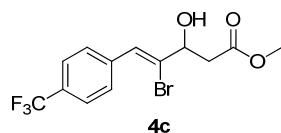

Chiralpak IC-3 column, hexane/*i*-PrOH 95/5, 0.6 mL min<sup>-1</sup>, 254 nm

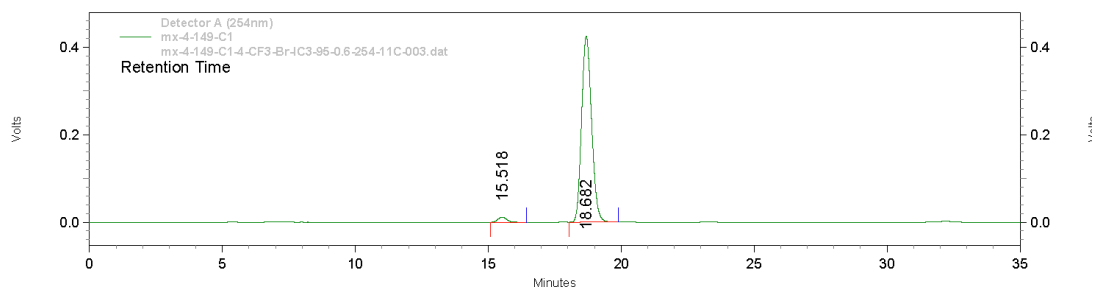

| Detector A (254nm) |                |          |         |        |          |
|--------------------|----------------|----------|---------|--------|----------|
| Pk #               | Retention Time | Area     | Area %  | Height | Height % |
| 1                  | 15.518         | 264010   | 2.322   | 11616  | 2.660    |
| 2                  | 18.682         | 11107804 | 97.678  | 425076 | 97.340   |
| Totals             |                | 11371814 | 100.000 | 436692 | 100.000  |

95.4% ee

Racemate

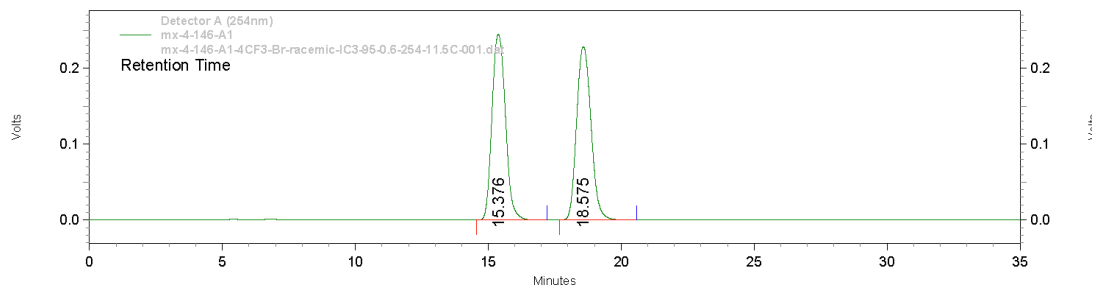

| Detector A (254nm) |                |          |         |        |          |
|--------------------|----------------|----------|---------|--------|----------|
| Pk #               | Retention Time | Area     | Area %  | Height | Height % |
| 1                  | 15.376         | 8612375  | 50.006  | 244983 | 51.730   |
| 2                  | 18.575         | 8610156  | 49.994  | 228595 | 48.270   |
| Totals             |                | 17222531 | 100.000 | 473578 | 100.000  |

Scheme 2 **4a'-c'**

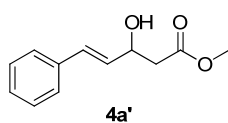

Chiralpak IC-3 column, hexane/*i*-PrOH 90/10, 0.9 mL min<sup>-1</sup>, 254 nm

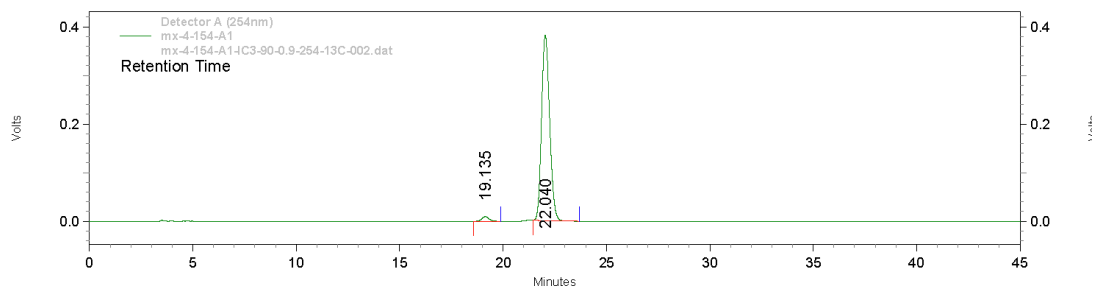

Detector A (254nm)

| Pk #   | Retention Time | Area     | Area %  | Height | Height % |
|--------|----------------|----------|---------|--------|----------|
| 1      | 19.135         | 218531   | 2.078   | 9323   | 2.385    |
| 2      | 22.040         | 10299049 | 97.922  | 381556 | 97.615   |
| Totals |                | 10517580 | 100.000 | 390880 | 100.000  |

95.8% ee

Racemate

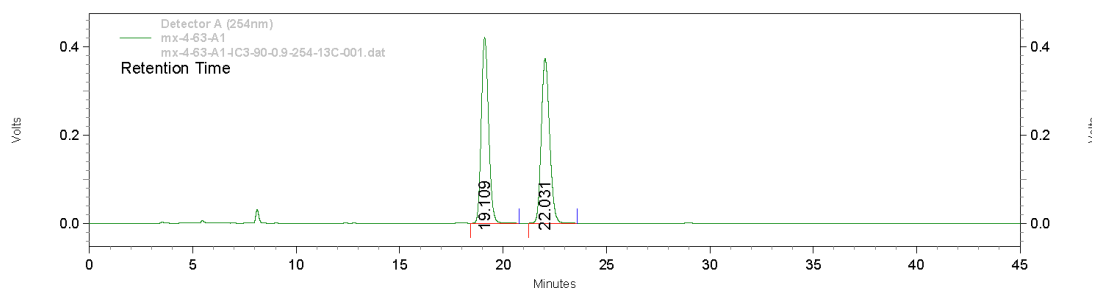

Detector A (254nm)

| Pk #   | Retention Time | Area     | Area %  | Height | Height % |
|--------|----------------|----------|---------|--------|----------|
| 1      | 19.109         | 10278541 | 49.791  | 421139 | 53.094   |
| 2      | 22.031         | 10364992 | 50.209  | 372058 | 46.906   |
| Totals |                | 20643533 | 100.000 | 793197 | 100.000  |



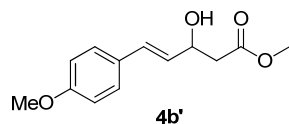

Chiralpak IC-3 column, hexane/*i*-PrOH 90/10, 1.0 mL min<sup>-1</sup>, 254 nm

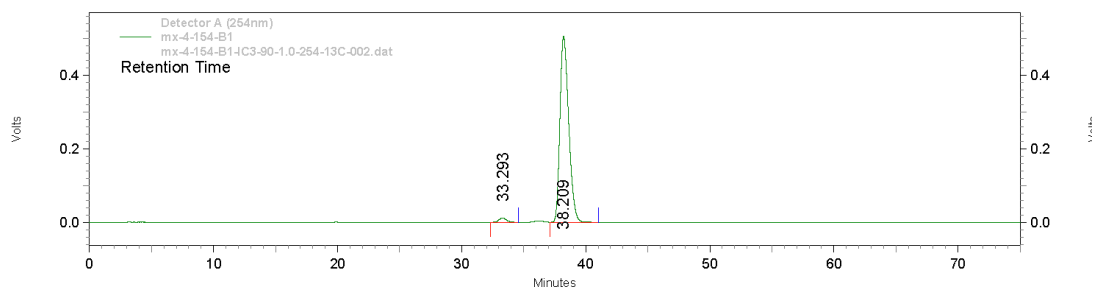

Detector A (254nm)

| PK #   | Retention Time | Area     | Area %  | Height | Height % |
|--------|----------------|----------|---------|--------|----------|
| 1      | 33.293         | 468815   | 1.862   | 11505  | 2.226    |
| 2      | 38.209         | 24714342 | 98.138  | 505319 | 97.774   |
| Totals |                | 25183157 | 100.000 | 516824 | 100.000  |

96.3% ee

Racemate

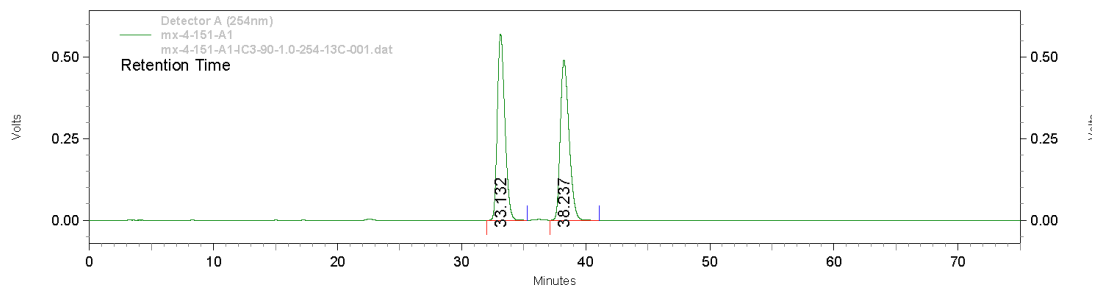

Detector A (254nm)

| PK #   | Retention Time | Area     | Area %  | Height  | Height % |
|--------|----------------|----------|---------|---------|----------|
| 1      | 33.132         | 24096112 | 50.084  | 570940  | 53.750   |
| 2      | 38.237         | 24015063 | 49.916  | 491273  | 46.250   |
| Totals |                | 48111175 | 100.000 | 1062214 | 100.000  |

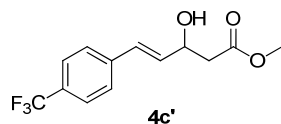

Chiralpak IC-3 column, hexane/*i*-PrOH 95/5, 0.8 mL min<sup>-1</sup>, 254 nm

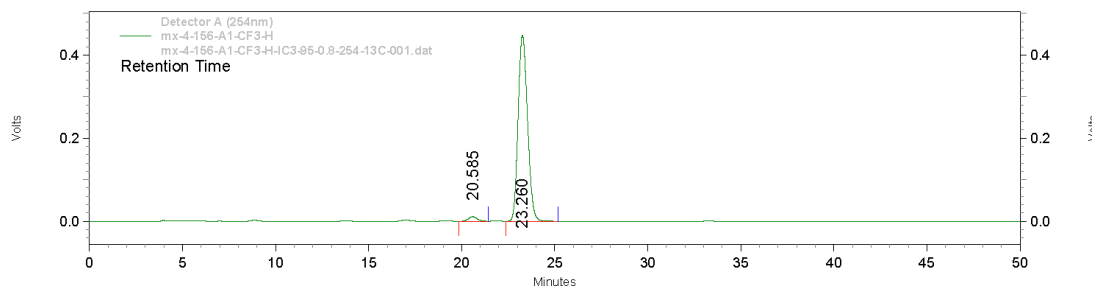

Detector A (254nm)

| Pk #   | Retention Time | Area     | Area %  | Height | Height % |
|--------|----------------|----------|---------|--------|----------|
| 1      | 20.585         | 345509   | 2.150   | 10878  | 2.371    |
| 2      | 23.260         | 15723280 | 97.850  | 447928 | 97.629   |
| Totals |                | 16068789 | 100.000 | 458806 | 100.000  |

95.7% ee

Racemate

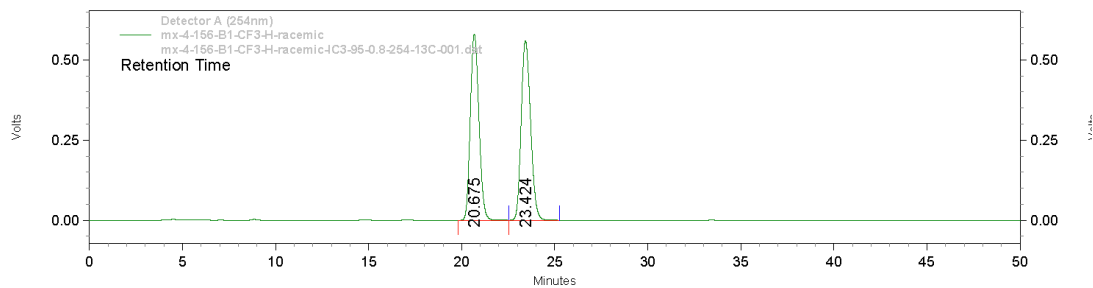

Detector A (254nm)

| Pk #   | Retention Time | Area     | Area %  | Height  | Height % |
|--------|----------------|----------|---------|---------|----------|
| 1      | 20.675         | 18706436 | 48.810  | 580492  | 50.892   |
| 2      | 23.424         | 19618890 | 51.190  | 560139  | 49.108   |
| Totals |                | 38325325 | 100.000 | 1140631 | 100.000  |
